# Supplementary material for: The regioselective annulation of N-methylpyridinium ylides with alkenes enabled by palladium catalysis: access to 3-unsubstituted indolizine derivatives
Source: Royal Society of Chemistry journal article supplement (doi:10.1039/d2qo00555g), 2022-01-01

# Supporting Information

## Regioselective Annulation of *N*-Methylpyridinium Ylides with Alkenes Enabled by Palladium Catalysis: Access to 3-Unsubstituted Indolizine Derivatives

Quan Gou,<sup>\*a</sup> Qianhua Zhu,<sup>a</sup> Mengjiao Deng,<sup>a</sup> Weiwei Li,<sup>a</sup> Xing Ran,<sup>a</sup> Jianfeng Xie,<sup>c</sup>  
Huisheng Huang,<sup>a</sup> Xiaoping Tan<sup>\*a</sup> and Minghong Zhu<sup>b</sup>

<sup>a</sup>Chongqing Key Laboratory of Inorganic Special Functional Materials, School of Chemistry and Chemical Engineering, Yangtze Normal University, Chongqing, 408100 China.

<sup>b</sup>Fuling Hospital, Chongqing University, Chongqing, 408000 China.

<sup>c</sup>Department of Chongqing General Hospital, University of Chinese Academy of Sciences, Chongqing 400013.

\*E-mail: [gouquan@yznu.edu.cn](mailto:gouquan@yznu.edu.cn) [gouq@outlook.com](mailto:gouq@outlook.com) (Q. G.)

\*E-mail: [xptan@yznu.edu.cn](mailto:xptan@yznu.edu.cn) (X. T.)

## Table of Contents

|                                                                                                 |     |
|-------------------------------------------------------------------------------------------------|-----|
| 1. General information .....                                                                    | S2  |
| 2. Preparation of compounds <b>2f</b> , <b>2l</b> , <b>2m</b> , <b>2n</b> , and <b>2o</b> ..... | S3  |
| 3. General procedure for the synthesis of indolizines.....                                      | S7  |
| 4. Spectroscopic data of the title compounds.....                                               | S7  |
| 5. Gram-scale synthesis .....                                                                   | S30 |
| 6. Synthesis of compound <b>6</b> .....                                                         | S31 |
| 7. Synthesis of compound <b>7</b> .....                                                         | S32 |
| 8. Synthesis of compound <b>8</b> .....                                                         | S32 |
| 9. X-ray crystallographic data of compound <b>3c</b> .....                                      | S34 |
| 10. Computational Studies .....                                                                 | S37 |
| 11. References.....                                                                             | S70 |
| 12. <sup>1</sup> H and <sup>13</sup> C NMR spectra.....                                         | S72 |

# 1. General information

Unless otherwise noted, solvents were distilled with a proper drying reagent and stored in a molecular sieve. Copper(I) oxide (98%+) were obtained from the commercial vendor (Bidepharm<sup>®</sup>) and used without further purification. SafeDry DMAc (dimethylacetamide, water  $\leq$  50 ppm) and Pd(OAc)<sub>2</sub> (99%+, Pd: 47%+) was purchased from Adamas-beta<sup>®</sup>. The other catalysts and reagents were purchased from commercial vendors and used directly without further purification. All *N*-methylpyridinium ylides were synthesized according to the reported literatures.<sup>[1]</sup> Column chromatography purifications performed using 300 – 400 mesh silica gel. NMR spectra (<sup>1</sup>H and <sup>13</sup>C NMR) were recorded on 400 or 600 MHz spectrometers (Bruker ADVANCE III). Chemical shifts were reported relative to the residual solvent peak (CHCl<sub>3</sub> in CDCl<sub>3</sub>). The following abbreviations (or combinations thereof) were used to explain multiplicities: s = singlet, d = doublet, t = triplet, q = quartet, m = multiplet. Coupling constants (*J*) were reported in the Hertz unit (Hz). High-resolution mass spectra (HRMS) were obtained by the ESI model from an ab sciex 500R QTOF or Waters Xevo G2-S QTOF instrument.

## 2. Preparation of compounds 2f, 2l, 2m, 2n, and 2o

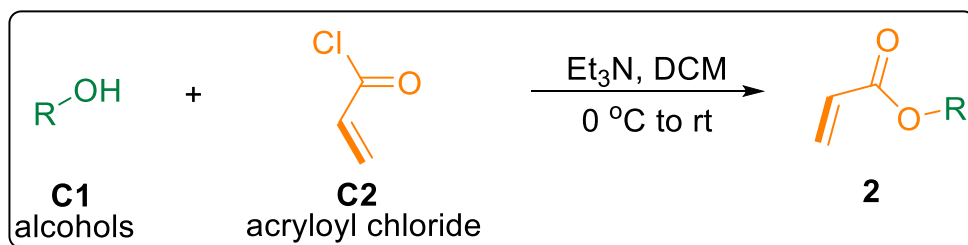

To a 50 mL round flask was charged with alcohols **C1** (1.0 g), Et<sub>3</sub>N (2.0 equiv) and 20 mL DCM. Then the acryloyl chloride **C2** (1.5 equiv) was added into the above mixture under an ice water bath. Next, the reaction mixture was vigorously stirred at rt. After the reaction was complete as monitored by TLC, the mixture was extracted with DCM. The organic layer was combined, dried over Na<sub>2</sub>SO<sub>4</sub>, and evaporated to give the residue. The crude product was separated by column chromatography (eluent: ethyl acetate/petroleum ether) on silica gel to give the compound **2**.

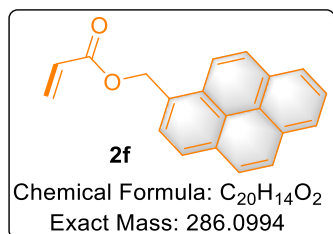

**pyren-1-ylmethyl acrylate (2f):** The compound **2f** was prepared according to the above procedure as a white solid (1.1 g, 90%), m.p. = 77.1–78.7 °C.

<sup>1</sup>H NMR (400 MHz, Chloroform-*d*) δ 8.30 (d, *J* = 9.2 Hz, 1H), 8.25 – 7.99 (m, 8H), 6.46 (dd, *J* = 17.3, 1.5 Hz, 1H), 6.19 (dd, *J* = 17.3, 10.4 Hz, 1H), 5.93 (s, 2H), 5.84 (dd, *J* = 10.4, 1.5 Hz, 1H).

<sup>13</sup>C NMR (101 MHz, Chloroform-*d*) δ 166.2, 131.8, 131.3, 131.2, 130.7, 129.6, 128.8, 128.3, 128.3, 127.9, 127.8, 127.4, 126.1, 125.6, 125.5, 124.9, 124.6, 122.9, 64.9.

HRMS (ESI) *m/z*: [M + Na]<sup>+</sup> Calcd for C<sub>20</sub>H<sub>14</sub>O<sub>2</sub>Na 309.0886; found: 309.0881.

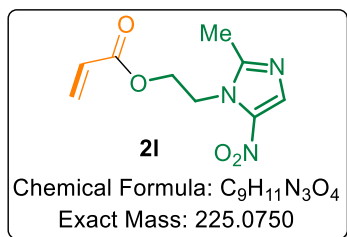

**2-(2-methyl-5-nitro-1H-imidazol-1-yl)ethyl acrylate (2l):** The compound **2l** was prepared according to the above procedure as a light yellow solid (986.2 mg, 75%), m.p. = 132.9–133.1 °C.

**<sup>1</sup>H NMR** (400 MHz, Chloroform-*d*) δ 7.96 (d, *J* = 1.6 Hz, 1H), 6.38 (dq, *J* = 17.3, 1.6 Hz, 1H), 6.06 (ddd, *J* = 17.2, 10.5, 1.3 Hz, 1H), 5.89 (dt, *J* = 10.4, 1.4 Hz, 1H), 4.64 (dd, *J* = 5.7, 4.6 Hz, 2H), 4.56 – 4.47 (m, 2H), 2.50 (s, 3H).

**<sup>13</sup>C NMR** (101 MHz, Chloroform-*d*) δ 165.4, 150.9, 138.5, 133.2, 132.3, 127.3, 62.5, 45.1, 14.3.

**HRMS** (ESI) *m/z*: [M + Na]<sup>+</sup> Calcd for C<sub>9</sub>H<sub>11</sub>N<sub>3</sub>O<sub>4</sub>Na 248.0642; found: 248.0641.

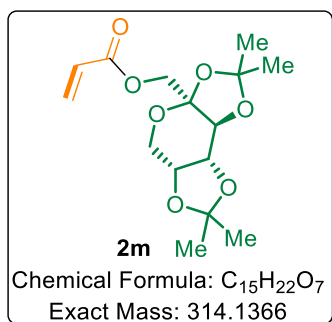

**((3a*S*,5a*R*,8a*R*,8b*S*)-2,2,7,7-tetramethyltetrahydro-3a*H*-bis([1,3]dioxolo)[4,5-*b*:4',5'-*d*]pyran-3a-yl)methyl acrylate (2m):** The compound **2m** was prepared according to the above procedure as a light yellow oil (844.9 mg, 70%).

**<sup>1</sup>H NMR** (400 MHz, Chloroform-*d*) δ 6.25 (dd, *J* = 17.4, 1.5 Hz, 1H), 5.96 (dd, *J* = 17.3, 10.4 Hz, 1H), 5.67 (dd, *J* = 10.4, 1.5 Hz, 1H), 4.42 (dd, *J* = 7.9, 2.6 Hz, 1H), 4.30 (d, *J* = 11.7 Hz, 1H), 4.16 (d, *J* = 2.7 Hz, 1H), 4.04 (dd, *J* = 7.9, 1.8 Hz, 1H), 3.90 (d, *J* = 11.8 Hz, 1H), 3.70 (dd, *J* = 12.9, 2.0 Hz, 1H), 3.54 (d, *J* = 12.9 Hz, 1H), 1.33 (s, 3H), 1.26 (s, 3H), 1.18 (s, 3H), 1.13 (s, 3H).



$^{13}\text{C}$  NMR (101 MHz, Chloroform-*d*)  $\delta$  164.9, 131.1, 128.0, 108.8, 108.4, 101.4, 70.6, 70.2, 69.9, 64.7, 61.0, 26.3, 25.7, 25.1, 23.9.

HRMS (ESI)  $m/z$ :  $[\text{M} + \text{Na}]^+$  Calcd for  $\text{C}_{15}\text{H}_{22}\text{O}_7\text{Na}$  337.1258; found: 337.1265.

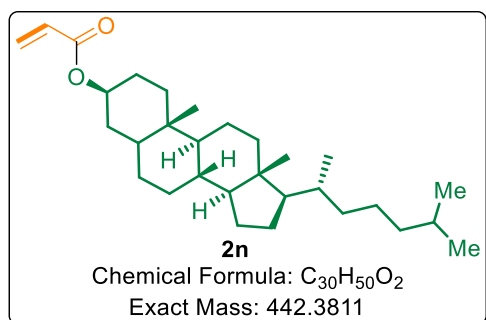

**(3*S*,8*R*,9*S*,10*S*,13*R*,14*S*,17*R*)-10,13-dimethyl-17-((*R*)-6-methylheptan-2-yl)hexadecahydro-1*H*-cyclopenta[*a*]phenanthren-3-yl acrylate (2n):** The compound **2n** was prepared according to the above procedure as a white solid (910.6 mg, 80%), m.p. = 91.6–93.2 °C.

$^1\text{H}$  NMR (400 MHz, Chloroform-*d*)  $\delta$  6.30 (dd,  $J = 17.3, 1.6$  Hz, 1H), 6.01 (dd,  $J = 17.3, 10.4$  Hz, 1H), 5.70 (dd,  $J = 10.4, 1.6$  Hz, 1H), 4.75 – 4.63 (m, 1H), 1.94 – 1.86 (m, 1H), 1.82 – 1.62 (m, 3H), 1.53 – 1.52 (m, 2H), 1.53 – 1.37 (m, 4H), 1.33 – 1.12 (m, 10H), 1.11 – 0.89 (m, 9H), 0.86 – 0.73 (m, 13H), 0.63 – 0.53 (m, 4H).

$^{13}\text{C}$  NMR (101 MHz, Chloroform-*d*)  $\delta$  165.7, 130.0, 129.2, 73.9, 56.4, 56.3, 54.2, 44.7, 42.6, 40.0, 39.5, 36.8, 36.2, 35.8, 35.5, 34.0, 32.0, 28.6, 28.3, 28.0, 27.5, 24.2, 23.9, 22.8, 22.6, 21.2, 18.7, 12.3, 12.1.

HRMS (ESI)  $m/z$ :  $[\text{M} + \text{Na}]^+$  Calcd for  $\text{C}_{30}\text{H}_{50}\text{O}_2\text{Na}$  465.3703; found: 465.3700.

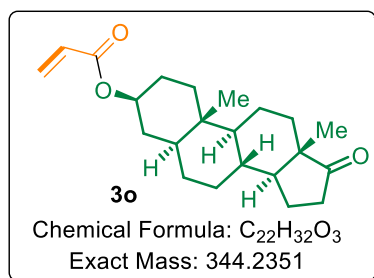

**(3*S*,5*S*,8*R*,9*S*,10*S*,13*S*,14*S*)-10,13-dimethyl-17-oxohexadecahydro-1*H*-cyclopenta[*a*]phenanthren-3-yl acrylate (2o):** The compound **2o** was prepared according to the above procedure as a white solid (651.9 mg, 55%), m.p. = 170.3–171.6 °C.

**<sup>1</sup>H NMR** (400 MHz, Chloroform-*d*) δ 6.38 (dt, *J* = 17.3, 1.4 Hz, 1H), 6.09 (ddd, *J* = 17.3, 10.5, 1.2 Hz, 1H), 5.80 (dt, *J* = 10.4, 1.4 Hz, 1H), 4.78 (ddt, *J* = 16.3, 11.2, 5.0 Hz, 1H), 2.49 – 2.38 (m, 1H), 2.13 – 2.01 (m, 1H), 1.98 – 1.73 (m, 5H), 1.71 – 1.62 (m, 2H), 1.61 – 1.37 (m, 4H), 1.37 – 1.18 (m, 6H), 1.12 – 0.93 (m, 2H), 0.86 (d, *J* = 2.4 Hz, 6H), 0.73 (td, *J* = 11.3, 3.9 Hz, 1H).

**<sup>13</sup>C NMR** (101 MHz, Chloroform-*d*) δ 165.8, 130.2, 129.1, 73.7, 54.3, 51.4, 47.8, 44.7, 36.7, 35.9, 35.7, 35.0, 33.9, 31.5, 30.8, 28.3, 27.4, 21.8, 20.5, 13.8, 12.2.

**HRMS** (ESI) *m/z*: [M + Na]<sup>+</sup> Calcd for C<sub>22</sub>H<sub>32</sub>O<sub>3</sub>Na 367.2244; found: 367.2241.

### 3. General procedure for the synthesis of indolizines

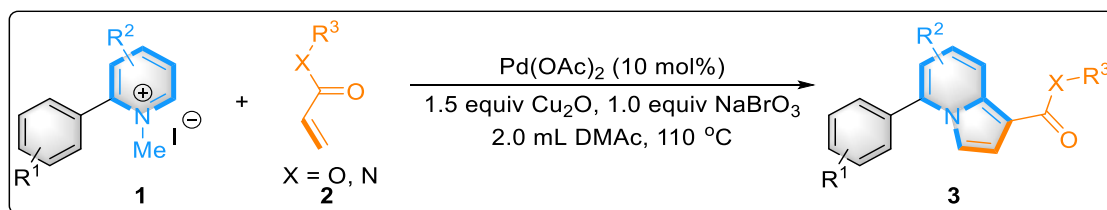

To a 15 mL Schlenk tube was charged with **1** (0.20 mmol),  $\text{Pd}(\text{OAc})_2$  (4.5 mg, 0.02 mmol), **2** (0.8 mmol),  $\text{NaBrO}_3$  (30.2 mg, 0.2 mmol, 1.0 equiv),  $\text{Cu}_2\text{O}$  (42.9 mg, 0.30 mmol, 1.5 equiv) and DMAc (dimethylacetamide, 2.0 mL) under an air atmosphere. The tube was evacuated and filled with Ar (1 atm), and stirred at rt for proper mixing of the reactants. Then the mixture heated at 110 °C (oil bath) with vigorous stirring for 24 h. After that, the reaction mixture was cooled to rt, diluted with ethyl acetate, washed with water, dried by anhydrous sodium sulfate and concentrated in *vacuo* to give the residue. The crude product was separated by column chromatography on silica gel (elution solvent: EtOAc/petroleum ether = 1/30 to 1/10) to afford the title compound **3**.

### 4. Spectroscopic data of the title compounds

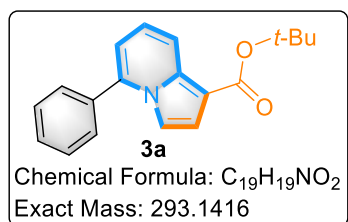

***tert*-butyl 5-phenylindolizine-1-carboxylate (3a)**: The title compound **3a** was prepared according to the general procedure as a white oil (48.7 mg, 85%).

**<sup>1</sup>H NMR** (600 MHz, Chloroform-*d*) δ 8.18 (d, *J* = 9.1 Hz, 1H), 7.60 – 7.47 (m, 5H), 7.25 (dd, *J* = 5.4, 2.0 Hz, 1H), 7.18 (d, *J* = 3.1 Hz, 1H), 7.10 (dd, *J* = 9.1, 6.8 Hz, 1H), 6.62 (d, *J* = 6.8 Hz, 1H), 1.64 (s, 9H).

**<sup>13</sup>C NMR** (151 MHz, Chloroform-*d*) δ 164.7, 138.0, 136.3, 134.7, 129.5, 129.1, 128.7, 122.3, 118.9, 116.1, 113.0, 111.9, 106.1, 79.5, 28.7.

**HRMS** (ESI) *m/z*: [M + H]<sup>+</sup> Calcd for C<sub>19</sub>H<sub>20</sub>NO<sub>2</sub> 294.1489; found: 294.1490.

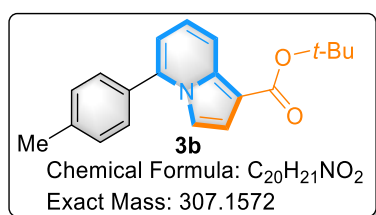

**tert-butyl 5-(p-tolyl)indolizine-1-carboxylate (3b):** The title compound **3b** was prepared according to the general procedure as a yellow oil (49.0 mg, 80%).

**<sup>1</sup>H NMR** (600 MHz, Chloroform-*d*) δ 8.16 (dd, *J* = 9.1, 1.2 Hz, 1H), 7.49 – 7.42 (m, 2H), 7.33 (d, *J* = 7.9 Hz, 2H), 7.26 (d, *J* = 1.9 Hz, 1H), 7.17 (d, *J* = 3.1 Hz, 1H), 7.09 (dd, *J* = 9.1, 6.8 Hz, 1H), 6.60 (dd, *J* = 6.8, 1.3 Hz, 1H), 2.45 (s, 3H), 1.64 (s, 9H).

**<sup>13</sup>C NMR** (151 MHz, Chloroform-*d*) δ 164.8, 139.6, 138.2, 136.3, 131.9, 129.8, 128.5, 122.4, 118.6, 116.0, 112.9, 112.0, 106.0, 79.5, 28.7, 21.4.

**HRMS** (ESI) *m/z*: [M + H]<sup>+</sup> Calcd for C<sub>20</sub>H<sub>22</sub>NO<sub>2</sub> 308.1645; found: 308.1644.

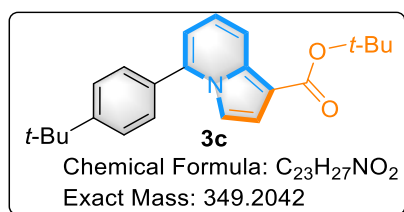

**tert-butyl 5-(4-(tert-butyl)phenyl)indolizine-1-carboxylate (3c):** The title compound **3c** was prepared according to the general procedure as a white solid (60.7 mg, 87%), m.p. = 159.9–160.8 °C.

**<sup>1</sup>H NMR** (600 MHz, Chloroform-*d*) δ 8.20 – 8.13 (m, 1H), 7.57 – 7.47 (m, 4H), 7.30 (dd, *J* = 3.1, 0.6 Hz, 1H), 7.17 (d, *J* = 3.1 Hz, 1H), 7.09 (dd, *J* = 9.1, 6.8 Hz, 1H), 6.61 (dd, *J* = 6.8, 1.3 Hz, 1H), 1.64 (s, 9H), 1.39 (s, 9H).

**<sup>13</sup>C NMR** (151 MHz, Chloroform-*d*) δ 164.8, 152.7, 138.2, 136.3, 131.8, 128.3, 126.0, 122.4, 118.6, 116.0, 112.9, 112.1, 106.0, 79.5, 34.9, 31.3, 28.7.

**HRMS** (ESI) *m/z*: [M + H]<sup>+</sup> Calcd for C<sub>23</sub>H<sub>28</sub>NO<sub>2</sub> 350.2115; found: 350.2104.

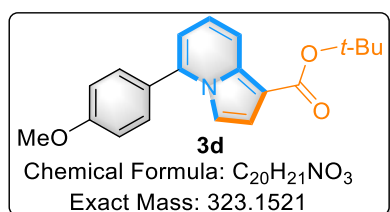

**tert-butyl 5-(4-methoxyphenyl)indolizine-1-carboxylate (3d)**: The title compound **3d** was prepared according to the general procedure as a white solid (54.8 mg, 85%), m.p. = 108.8–109.1 °C.

**<sup>1</sup>H NMR** (600 MHz, Chloroform-*d*) δ 8.16 (dt, *J* = 9.1, 0.9 Hz, 1H), 7.53 – 7.47 (m, 2H), 7.25 (s, 1H), 7.18 (d, *J* = 3.1 Hz, 1H), 7.09 (dd, *J* = 9.1, 6.8 Hz, 1H), 7.06 – 6.97 (m, 2H), 6.59 (dd, *J* = 6.8, 1.3 Hz, 1H), 3.89 (s, 3H), 1.64 (s, 9H).

**<sup>13</sup>C NMR** (151 MHz, Chloroform-*d*) δ 164.8, 160.4, 137.9, 136.3, 130.0, 127.1, 122.4, 118.5, 116.0, 114.5, 112.8, 111.9, 106.0, 79.5, 55.4, 28.7.

**HRMS** (ESI) *m/z*: [M + H]<sup>+</sup> Calcd for C<sub>20</sub>H<sub>22</sub>NO<sub>3</sub> 324.1594; found: 324.1596.

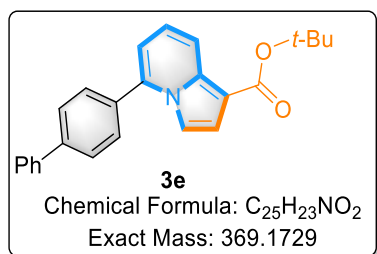

**tert-butyl 5-([1,1'-biphenyl]-4-yl)indolizine-1-carboxylate (3e)**: The title compound **3e** was prepared according to the general procedure as a light yellow solid (55.4 mg,

75%), m.p. = 160.1–161.2 °C.

<sup>1</sup>H NMR (600 MHz, Chloroform-*d*) δ 8.20 (d, *J* = 9.2 Hz, 1H), 7.77 – 7.72 (m, 2H), 7.66 (dt, *J* = 6.6, 1.2 Hz, 4H), 7.52 – 7.47 (m, 2H), 7.44 – 7.38 (m, 1H), 7.36 – 7.32 (m, 1H), 7.21 (d, *J* = 3.1 Hz, 1H), 7.12 (dd, *J* = 9.1, 6.8 Hz, 1H), 6.67 (dd, *J* = 6.8, 1.3 Hz, 1H).

<sup>13</sup>C NMR (151 MHz, Chloroform-*d*) δ 164.7, 142.4, 140.2, 137.8, 136.3, 133.6, 129.1, 129.0, 127.9, 127.8, 127.2, 122.3, 118.9, 116.2, 113.1, 112.0, 106.2, 79.6, 28.7.

HRMS (ESI) *m/z*: [M + H]<sup>+</sup> Calcd for C<sub>25</sub>H<sub>24</sub>NO<sub>2</sub> 370.1802; found: 370.1791.

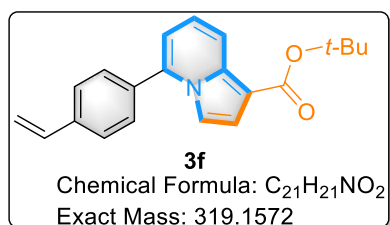

**tert-butyl 5-(4-vinylphenyl)indolizine-1-carboxylate (3f):** The title compound **3f** was prepared according to the general procedure as a yellow oil (49.1 mg, 77%).

<sup>1</sup>H NMR (600 MHz, Chloroform-*d*) δ 8.18 (dd, *J* = 9.1, 1.3 Hz, 1H), 7.60 – 7.52 (m, 4H), 7.28 (d, *J* = 3.1 Hz, 1H), 7.18 (d, *J* = 3.1 Hz, 1H), 7.10 (dd, *J* = 9.1, 6.8 Hz, 1H), 6.79 (dd, *J* = 17.6, 10.9 Hz, 1H), 6.62 (dd, *J* = 6.8, 1.3 Hz, 1H), 5.86 (dd, *J* = 17.6, 0.7 Hz, 1H), 5.37 (dd, *J* = 10.8, 0.7 Hz, 1H), 1.64 (s, 9H).

<sup>13</sup>C NMR (151 MHz, Chloroform-*d*) δ 164.7, 138.8, 137.8, 136.3, 136.0, 134.0, 128.8, 126.9, 122.3, 118.9, 116.2, 115.4, 113.0, 111.9, 106.1, 79.6, 28.7.

HRMS (ESI) *m/z*: [M + H]<sup>+</sup> Calcd for C<sub>21</sub>H<sub>22</sub>NO<sub>2</sub> 320.1645; found: 320.1645.

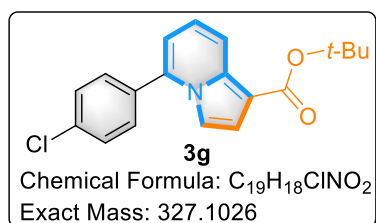

**tert-butyl 5-(4-chlorophenyl)indolizine-1-carboxylate (3g):** The title compound **3g**

was prepared according to the general procedure as a yellow oil (53.0 mg, 81%).

$^1\text{H NMR}$  (600 MHz, Chloroform-*d*)  $\delta$  8.20 (dd,  $J = 9.1, 1.2$  Hz, 1H), 7.52 (d,  $J = 1.6$  Hz, 4H), 7.22 – 7.17 (m, 2H), 7.09 (dd,  $J = 9.1, 6.8$  Hz, 1H), 6.60 (dd,  $J = 6.8, 1.3$  Hz, 1H), 1.64 (s, 9H).

$^{13}\text{C NMR}$  (151 MHz, Chloroform-*d*)  $\delta$  164.6, 136.7, 136.2, 135.6, 133.1, 130.1, 129.5, 122.1, 119.2, 116.3, 113.2, 111.7, 106.4, 79.7, 28.7.

**HRMS** (ESI)  $m/z$ :  $[\text{M} + \text{H}]^+$  Calcd for  $\text{C}_{19}\text{H}_{19}\text{ClNO}_2$  328.1099; found: 328.1101.

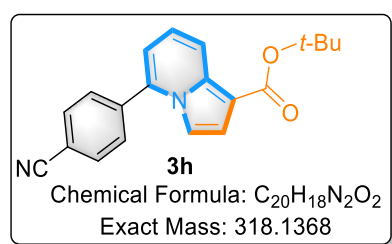

**tert-butyl 5-(4-cyanophenyl)indolizine-1-carboxylate (3h):** The title compound **3h** was prepared according to the general procedure as a yellow oil (44.5 mg, 70%).

$^1\text{H NMR}$  (600 MHz, Chloroform-*d*)  $\delta$  8.24 (dd,  $J = 9.2, 1.2$  Hz, 1H), 7.87 – 7.82 (m, 2H), 7.76 – 7.71 (m, 2H), 7.23 – 7.17 (m, 2H), 7.11 (dd,  $J = 9.1, 6.8$  Hz, 1H), 6.64 (dd,  $J = 6.8, 1.3$  Hz, 1H), 1.64 (s, 9H).

$^{13}\text{C NMR}$  (151 MHz, Chloroform-*d*)  $\delta$  164.4, 139.1, 136.1, 135.8, 133.0, 129.4, 121.9, 120.1, 118.2, 116.7, 113.8, 113.4, 111.5, 106.9, 79.9, 28.6.

**HRMS** (ESI)  $m/z$ :  $[\text{M} + \text{H}]^+$  Calcd for  $\text{C}_{20}\text{H}_{19}\text{N}_2\text{O}_2$  319.1441; found: 319.1443.

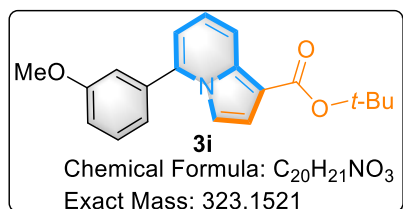

**tert-butyl 5-(3-methoxyphenyl)indolizine-1-carboxylate (3i):** The title compound **3i** was prepared according to the general procedure as a yellow oil (53.0 mg, 82%).

**<sup>1</sup>H NMR** (600 MHz, Chloroform-*d*) δ 8.18 (ddd, *J* = 9.1, 1.3, 0.6 Hz, 1H), 7.47 – 7.41 (m, 1H), 7.28 (dd, *J* = 3.1, 0.6 Hz, 1H), 7.18 (d, *J* = 3.1 Hz, 1H), 7.16 (ddd, *J* = 7.6, 1.6, 0.9 Hz, 1H), 7.12 – 7.08 (m, 2H), 7.04 (ddd, *J* = 8.4, 2.6, 1.0 Hz, 1H), 6.63 (dd, *J* = 6.8, 1.3 Hz, 1H), 3.85 (s, 3H), 1.64 (s, 9H).

**<sup>13</sup>C NMR** (151 MHz, Chloroform-*d*) δ 164.7, 160.1, 137.9, 136.2, 136.0, 130.2, 122.2, 120.9, 118.9, 116.1, 115.1, 114.2, 112.9, 112.1, 106.1, 79.5, 55.4, 28.7.

**HRMS** (ESI) *m/z*: [M + H]<sup>+</sup> Calcd for C<sub>20</sub>H<sub>22</sub>NO<sub>3</sub> 324.1594; found: 324.1589.

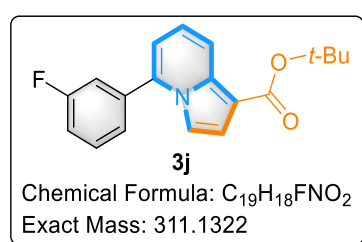

**tert-butyl 5-(3-fluorophenyl)indolizine-1-carboxylate (3j):** The title compound **3j** was prepared according to the general procedure as a yellow oil (52.3 mg, 84%).

**<sup>1</sup>H NMR** (600 MHz, Chloroform-*d*) δ 8.21 (d, *J* = 9.1 Hz, 1H), 7.51 (td, *J* = 8.0, 5.9 Hz, 1H), 7.42 – 7.36 (m, 1H), 7.30 (dt, *J* = 9.3, 2.1 Hz, 1H), 7.25 – 7.18 (m, 3H), 7.10 (dd, *J* = 9.1, 6.8 Hz, 1H), 6.63 (dd, *J* = 6.8, 1.3 Hz, 1H), 1.64 (s, 9H).

**<sup>13</sup>C NMR** (151 MHz, Chloroform-*d*) δ 164.6, 163.0 (d, *J*<sub>C-F</sub> = 247.64 Hz), 136.6 (t, *J*<sub>C-F</sub> = 9.06 Hz), 136.2, 130.9 (d, *J*<sub>C-F</sub> = 7.55 Hz), 124.4 (d, *J*<sub>C-F</sub> = 3.02 Hz), 122.1, 119.4, 116.6 (d, *J*<sub>C-F</sub> = 21.14 Hz), 116.4, 115.9 (d, *J*<sub>C-F</sub> = 21.14 Hz), 113.2, 111.8, 106.4, 79.7, 28.65.

**HRMS** (ESI) *m/z*: [M + H]<sup>+</sup> Calcd for C<sub>19</sub>H<sub>19</sub>FNO<sub>2</sub> 312.1394; found: 312.1395.

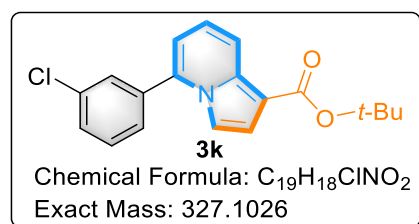

**tert-butyl 5-(3-chlorophenyl)indolizine-1-carboxylate (3k):** The title compound **3k** was prepared according to the general procedure as a yellow oil (52.3 mg, 80%).



**<sup>1</sup>H NMR** (600 MHz, Chloroform-*d*) δ 8.24 – 8.18 (m, 1H), 7.57 (d, *J* = 1.5 Hz, 1H), 7.53 – 7.45 (m, 3H), 7.23 – 7.18 (m, 2H), 7.09 (dd, *J* = 9.1, 6.7 Hz, 1H), 6.61 (dt, *J* = 6.8, 1.0 Hz, 1H), 1.64 (s, 9H).

**<sup>13</sup>C NMR** (151 MHz, Chloroform-*d*) δ 164.6, 136.4, 136.2, 135.2, 130.5, 129.7, 128.8, 126.8, 122.1, 119.4, 116.4, 113.3, 111.8, 106.5, 79.7, 28.7.

**HRMS** (ESI) *m/z* Calcd for C<sub>19</sub>H<sub>19</sub>ClNO<sub>2</sub> (M + H)<sup>+</sup>: 328.1099, found: 328.1100.

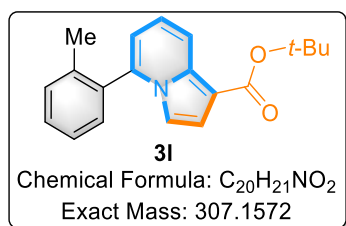

**tert-butyl 5-(o-tolyl)indolizine-1-carboxylate (3l):** The title compound **3l** was prepared according to the general procedure as a yellow solid (51.0 mg, 83%), m.p. = 122.4–123.8 °C.

**<sup>1</sup>H NMR** (600 MHz, Chloroform-*d*) δ 8.20 (dd, *J* = 9.1, 1.3 Hz, 1H), 7.42 (td, *J* = 7.5, 1.6 Hz, 1H), 7.38 – 7.27 (m, 3H), 7.16 (d, *J* = 3.0 Hz, 1H), 7.12 (dd, *J* = 9.1, 6.7 Hz, 1H), 6.70 (dd, *J* = 3.0, 0.6 Hz, 1H), 6.59 (dd, *J* = 6.7, 1.3 Hz, 1H), 2.06 (s, 3H), 1.64 (s, 9H).

**<sup>13</sup>C NMR** (151 MHz, Chloroform-*d*) δ 164.7, 137.7, 137.2, 135.8, 134.0, 130.6, 129.9, 129.7, 126.5, 122.1, 118.7, 116.2, 112.8, 112.1, 106.0, 79.5, 28.7, 18.9.

**HRMS** (ESI) *m/z*: [M + H]<sup>+</sup> Calcd for C<sub>20</sub>H<sub>22</sub>NO<sub>2</sub> 308.1645; found: 308.1637.

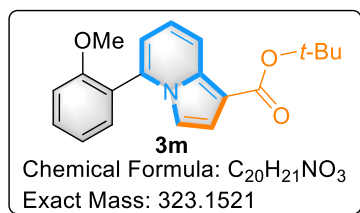

**tert-butyl 5-(2-methoxyphenyl)indolizine-1-carboxylate (3m):** The title compound **3m** was prepared according to the general procedure as a white oil (58.2 mg, 90%).

**<sup>1</sup>H NMR** (600 MHz, Chloroform-*d*) δ 8.19 (dt, *J* = 9.1, 1.5 Hz, 1H), 7.50 (ddd, *J* = 8.3, 7.5, 1.8 Hz, 1H), 7.34 (dd, *J* = 7.4, 1.8 Hz, 1H), 7.17 – 7.13 (m, 1H), 7.13 – 7.06 (m, 2H), 7.04 (dd, *J* = 8.4, 1.0 Hz, 1H), 6.82 (d, *J* = 3.0 Hz, 1H), 6.63 (dd, *J* = 6.8, 1.3 Hz, 1H).

**<sup>13</sup>C NMR** (151 MHz, Chloroform-*d*) δ 164.8, 157.4, 135.9, 135.7, 131.4, 131.2, 123.5, 121.9, 121.1, 118.7, 115.7, 113.4, 112.9, 111.1, 105.7, 79.4, 55.5, 28.7.

**HRMS** (ESI) *m/z*: [M + H]<sup>+</sup> Calcd for C<sub>20</sub>H<sub>22</sub>NO<sub>3</sub> 324.1594; found: 324.1591.

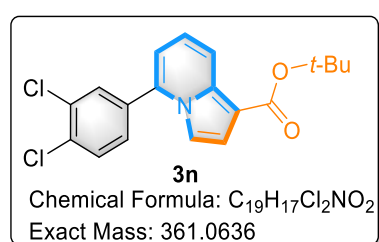

***tert*-butyl 5-(3,4-dichlorophenyl)indolizine-1-carboxylate (3n)**: The title compound **3n** was prepared according to the general procedure as a light yellow solid (41.2 mg, 57%), m.p. = 138.9–139.1 °C.

**<sup>1</sup>H NMR** (600 MHz, Chloroform-*d*) δ 8.21 (dd, *J* = 9.1, 1.2 Hz, 1H), 7.69 (d, *J* = 2.1 Hz, 1H), 7.62 (d, *J* = 8.2 Hz, 1H), 7.44 (dd, *J* = 8.2, 2.1 Hz, 1H), 7.22 – 7.17 (m, 2H), 7.09 (dd, *J* = 9.1, 6.7 Hz, 1H), 6.61 (dd, *J* = 6.8, 1.3 Hz, 1H), 1.64 (s, 9H).

**<sup>13</sup>C NMR** (151 MHz, Chloroform-*d*) δ 164.5, 136.1, 135.4, 134.5, 133.9, 133.6, 131.3, 130.7, 127.9, 121.9, 119.7, 116.6, 113.5, 111.6, 106.7, 79.8, 28.6.

**HRMS** (ESI) *m/z*: [M + H]<sup>+</sup> Calcd for C<sub>19</sub>H<sub>18</sub>Cl<sub>2</sub>NO<sub>2</sub> 362.0709; found: 362.0714.

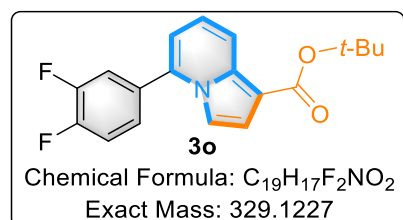

***tert*-butyl 5-(3,4-difluorophenyl)indolizine-1-carboxylate (3o)**: The title compound **3o** was prepared according to the general procedure as a white viscous oil (45.4 mg, 69%).

**<sup>1</sup>H NMR** (600 MHz, Chloroform-*d*)  $\delta$  8.21 (d,  $J = 8.6$  Hz, 1H), 7.46 – 7.37 (m, 1H), 7.37 – 7.26 (m, 2H), 7.24 – 7.18 (m, 2H), 7.09 (dd,  $J = 9.1, 6.8$  Hz, 1H), 6.60 (dd,  $J = 6.8, 1.3$  Hz, 1H), 1.64 (s, 9H).

**<sup>13</sup>C NMR** (151 MHz, Chloroform-*d*)  $\delta$  164.5, 150.8 (ddd,  $J_{C-F} = 12.08$  MHz,  $J_{C-F} = 48.32$  MHz,  $J_{C-F} = 251.42$  MHz), 136.2, 135.7, 131.5 (t,  $J_{C-F} = 6.04$  MHz), 125.2 (q,  $J_{C-F} = 3.02$  MHz), 122.0, 119.5, 118.20 (q,  $J_{C-F} = 16.61$  MHz), 116.5, 113.4, 111.5, 106.6, 79.7, 28.6.

**HRMS** (ESI)  $m/z$ :  $[M + H]^+$  Calcd for C<sub>19</sub>H<sub>18</sub>F<sub>2</sub>NO<sub>2</sub> 330.1300; found: 330.1305.

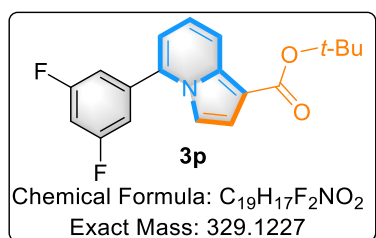

**tert-butyl 5-(3,5-difluorophenyl)indolizine-1-carboxylate (3p):** The title compound **3p** was prepared according to the general procedure as a dark green oil (44.8 mg, 68%).

**<sup>1</sup>H NMR** (600 MHz, Chloroform-*d*)  $\delta$  8.22 (d,  $J = 9.1$  Hz, 1H), 7.23 (dd,  $J = 17.1, 3.1$  Hz, 2H), 7.16 – 7.11 (m, 2H), 7.09 (dd,  $J = 9.1, 6.8$  Hz, 1H), 6.97 (td,  $J = 8.8, 4.4$  Hz, 1H), 6.63 (d,  $J = 6.8$  Hz, 1H), 1.64 (s, 9H).

**<sup>13</sup>C NMR** (151 MHz, Chloroform-*d*)  $\delta$  164.5, 163.5 (dd,  $J_{C-F} = 13.59, 238.58$  Hz), 137.6 (t,  $J_{C-F} = 10.57$  Hz), 136.1, 135.4 (t,  $J_{C-F} = 3.02$  Hz), 121.8, 119.9, 116.6, 113.4, 111.9 (dd,  $J_{C-F} = 6.04, 15.10$  Hz), 111.6, 106.8, 105.1 (t,  $J_{C-F} = 25.67$  Hz), 79.8, 28.6.

**HRMS** (ESI)  $m/z$ :  $[M + H]^+$  Calcd for C<sub>19</sub>H<sub>18</sub>F<sub>2</sub>NO<sub>2</sub> 330.1300; found: 330.1305.

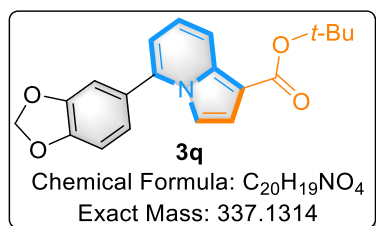

**tert-butyl 5-(benzo[d][1,3]dioxol-5-yl)indolizine-1-carboxylate (3q):** The title

compound **3q** was prepared according to the general procedure as a yellow-brown oil (53.3 mg, 79%).

**<sup>1</sup>H NMR** (600 MHz, Chloroform-*d*)  $\delta$  8.19 – 8.12 (m, 1H), 7.27 (dd,  $J = 3.1, 0.6$  Hz, 1H), 7.18 (d,  $J = 3.1$  Hz, 1H), 7.09 – 7.02 (m, 3H), 6.95 (d,  $J = 7.9$  Hz, 1H), 6.58 (dd,  $J = 6.8, 1.3$  Hz, 1H), 6.06 (s, 2H), 1.64 (s, 9H).

**<sup>13</sup>C NMR** (151 MHz, Chloroform-*d*)  $\delta$  164.7, 148.6, 148.2, 137.6, 136.3, 128.4, 122.8, 122.3, 118.7, 116.1, 112.9, 112.0, 109.0, 109.0, 106.1, 101.6, 79.5, 28.7.

**HRMS** (ESI)  $m/z$ :  $[M + H]^+$  Calcd for C<sub>20</sub>H<sub>20</sub>NO<sub>4</sub> 338.1387; found: 338.1378.

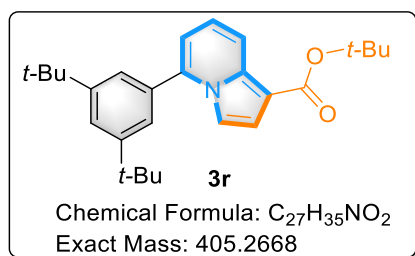

**tert-butyl 5-(3,5-di-tert-butylphenyl)indolizine-1-carboxylate (3r):** The title compound **3r** was prepared according to the general procedure as a yellow oil (66.5 mg, 82%).

**<sup>1</sup>H NMR** (600 MHz, Chloroform-*d*)  $\delta$  8.18 (d,  $J = 9.1$  Hz, 1H), 7.57 – 7.53 (m, 1H), 7.40 (d,  $J = 1.7$  Hz, 2H), 7.27 (dd,  $J = 3.1, 1.6$  Hz, 1H), 7.19 (dd,  $J = 3.1, 1.5$  Hz, 1H), 7.11 (ddd,  $J = 8.7, 6.8, 1.5$  Hz, 1H), 6.65 (d,  $J = 6.7$  Hz, 1H), 1.64 (d,  $J = 1.7$  Hz, 9H), 1.37 (d,  $J = 1.8$  Hz, 18H).

**<sup>13</sup>C NMR** (151 MHz, Chloroform-*d*)  $\delta$  164.8, 151.7, 139.2, 136.4, 134.0, 123.4, 122.9, 122.4, 118.5, 116.0, 112.8, 112.1, 105.9, 79.5, 35.1, 31.4, 28.7.

**HRMS** (ESI)  $m/z$ :  $[M + H]^+$  Calcd for C<sub>27</sub>H<sub>36</sub>NO<sub>2</sub> 406.2741; found: 406.2718.

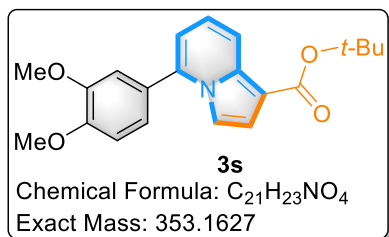

**tert-butyl 5-(3,4-dimethoxyphenyl)indolizine-1-carboxylate (3s):** The title compound **3s** was prepared according to the general procedure as a light yellow oil (59.3 mg, 84%).

**<sup>1</sup>H NMR** (600 MHz, Chloroform-*d*) δ 8.17 (ddd, *J* = 9.0, 1.3, 0.6 Hz, 1H), 7.29 (dd, *J* = 3.1, 0.6 Hz, 1H), 7.19 (d, *J* = 3.1 Hz, 1H), 7.15 (dd, *J* = 8.2, 2.0 Hz, 1H), 7.12 – 7.08 (m, 1H), 7.08 – 7.06 (m, 1H), 7.01 (d, *J* = 8.2 Hz, 1H), 6.61 (dd, *J* = 6.8, 1.3 Hz, 1H), 3.96 (s, 3H), 3.90 (s, 3H), 1.64 (s, 9H).

**<sup>13</sup>C NMR** (151 MHz, Chloroform-*d*) δ 164.7, 150.0, 149.3, 137.9, 136.3, 127.2, 122.3, 121.5, 118.6, 116.1, 112.8, 112.0, 111.6, 111.5, 106.0, 79.5, 56.1, 56.0, 28.7.

**HRMS** (ESI) *m/z*: [M + H]<sup>+</sup> Calcd for C<sub>21</sub>H<sub>24</sub>NO<sub>4</sub> 354.1700; found: 354.1690.

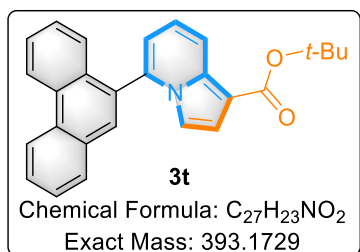

**tert-butyl 5-(phenanthren-9-yl)indolizine-1-carboxylate (3t):** The title compound **3t** was prepared according to the general procedure as a yellow oil (60.5 mg, 77%).

**<sup>1</sup>H NMR** (600 MHz, Chloroform-*d*) δ 8.82 – 8.73 (m, 2H), 8.36 – 8.30 (m, 1H), 7.92 (dd, *J* = 7.9, 1.4 Hz, 1H), 7.87 (s, 1H), 7.75 (ddd, *J* = 8.3, 7.0, 1.4 Hz, 1H), 7.67 (dddd, *J* = 11.8, 8.0, 7.0, 1.2 Hz, 2H), 7.43 (ddd, *J* = 8.1, 6.9, 1.2 Hz, 1H), 7.30 (dd, *J* = 8.3, 1.3 Hz, 1H), 7.21 (dd, *J* = 9.2, 6.7 Hz, 1H), 7.09 (d, *J* = 3.1 Hz, 1H), 6.86 (dd, *J* = 6.6, 1.3 Hz, 1H), 6.66 – 6.62 (m, 1H), 1.65 (s, 9H).

$^{13}\text{C}$  NMR (151 MHz, Chloroform-*d*)  $\delta$  164.8, 136.6, 135.9, 131.3, 131.0, 130.9, 130.6, 129.5, 129.4, 129.2, 127.9, 127.3, 127.3, 127.2, 125.9, 123.3, 122.8, 122.1, 119.3, 116.2, 114.1, 113.2, 106.1, 79.6, 28.7.

HRMS (ESI)  $m/z$ :  $[\text{M} + \text{H}]^+$  Calcd for  $\text{C}_{27}\text{H}_{24}\text{NO}_2$  394.1802; found: 394.1794.

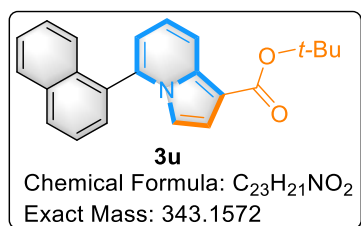

**tert-butyl 5-(naphthalen-1-yl)indolizine-1-carboxylate (3u):** The title compound **3u** was prepared according to the general procedure as a yellow oil (48.04 mg, 70%).

$^1\text{H}$  NMR (600 MHz, Chloroform-*d*)  $\delta$  8.22 (d,  $J = 9.1$  Hz, 1H), 8.05 (s, 1H), 7.99 (d,  $J = 8.4$  Hz, 1H), 7.92 (dd,  $J = 12.9, 7.6$  Hz, 2H), 7.66 (dd,  $J = 8.4, 1.9$  Hz, 1H), 7.62 – 7.54 (m, 2H), 7.29 (t,  $J = 2.4$  Hz, 1H), 7.20 (t,  $J = 2.3$  Hz, 1H), 7.14 (ddd,  $J = 8.8, 6.7, 1.6$  Hz, 1H), 6.73 (d,  $J = 6.7$  Hz, 1H), 1.65 (d,  $J = 1.7$  Hz, 9H).

$^{13}\text{C}$  NMR (151 MHz, Chloroform-*d*)  $\delta$  164.7, 138.0, 136.3, 133.6, 133.5, 132.1, 128.8, 128.4, 128.3, 127.9, 127.2, 126.9, 125.7, 122.4, 119.0, 116.2, 113.4, 112.0, 106.2, 79.6, 28.7.

HRMS (ESI)  $m/z$ :  $[\text{M} + \text{H}]^+$  Calcd for  $\text{C}_{23}\text{H}_{22}\text{NO}_2$  344.1645; found: 344.1637.

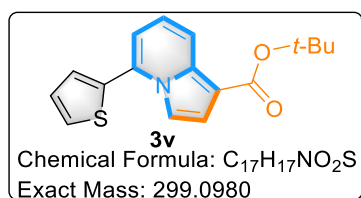

**tert-butyl 5-(thiophen-2-yl)indolizine-1-carboxylate (3v):** The title compound **3v** was prepared according to the general procedure as a yellow oil (44.9 mg, 75%).

**<sup>1</sup>H NMR** (600 MHz, Chloroform-*d*) δ 8.20 (dd, *J* = 9.1, 1.2 Hz, 1H), 7.60 (d, *J* = 3.1 Hz, 1H), 7.54 – 7.42 (m, 2H), 7.23 (d, *J* = 3.1 Hz, 1H), 7.22 – 7.17 (m, 1H), 7.06 (dd, *J* = 9.0, 6.8 Hz, 1H), 6.80 (dd, *J* = 6.8, 1.2 Hz, 1H), 1.64 (s, 9H).

**<sup>13</sup>C NMR** (151 MHz, Chloroform-*d*) δ 164.6, 136.3, 135.4, 131.2, 128.0, 127.7, 127.1, 121.7, 119.4, 116.4, 114.5, 112.3, 106.6, 79.7, 28.7.

**HRMS** (ESI) *m/z*: [M + H]<sup>+</sup> Calcd for C<sub>17</sub>H<sub>18</sub>NO<sub>2</sub>S 300.1053; found: 300.1059.

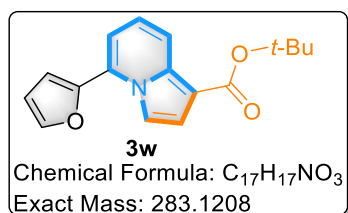

**tert-butyl 5-(furan-2-yl)indolizine-1-carboxylate (3w)**: The title compound **3w** was prepared according to the general procedure as a brown oil (38.5 mg, 68%).

**<sup>1</sup>H NMR** (600 MHz, Chloroform-*d*) δ 8.21 (d, *J* = 8.9 Hz, 1H), 7.82 – 7.77 (m, 1H), 7.62 (s, 1H), 7.29 (dd, *J* = 3.1, 1.6 Hz, 1H), 7.11 – 7.01 (m, 2H), 6.92 (dd, *J* = 3.5, 1.6 Hz, 1H), 6.61 (dt, *J* = 3.5, 1.8 Hz, 1H), 1.64 (s, 9H).

**<sup>13</sup>C NMR** (151 MHz, Chloroform-*d*) δ 164.6, 147.8, 143.3, 136.3, 128.2, 121.4, 119.4, 116.7, 112.9, 112.2, 111.7, 110.6, 106.3, 79.7, 28.7.

**HRMS** (ESI) *m/z*: [M + H]<sup>+</sup> Calcd for C<sub>17</sub>H<sub>18</sub>NO<sub>3</sub> 284.1281; found: 284.1282.

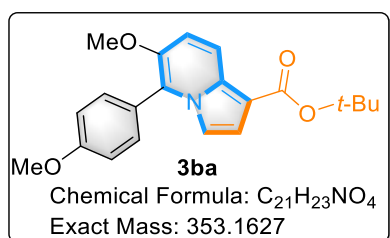

**tert-butyl 6-methoxy-5-(4-methoxyphenyl)indolizine-1-carboxylate (3ba)**: The title compound **3ba** was prepared according to the general procedure as a white oil (37.4 mg, 53%).

**<sup>1</sup>H NMR** (600 MHz, Chloroform-*d*)  $\delta$  8.16 (d,  $J$  = 9.7 Hz, 1H), 7.44 – 7.33 (m, 2H), 7.13 – 7.05 (m, 4H), 6.94 (d,  $J$  = 3.0 Hz, 1H), 3.89 (s, 3H), 3.72 (s, 3H), 1.63 (s, 9H).

**<sup>13</sup>C NMR** (151 MHz, Chloroform-*d*)  $\delta$  164.7, 160.2, 145.1, 133.3, 131.3, 126.2, 123.0, 119.1, 116.1, 114.9, 114.6, 112.3, 105.7, 79.4, 58.7, 55.4, 28.7.

**HRMS** (ESI)  $m/z$ :  $[M + H]^+$  Calcd for C<sub>21</sub>H<sub>24</sub>NO<sub>4</sub> 354.1700; found: 354.1696.

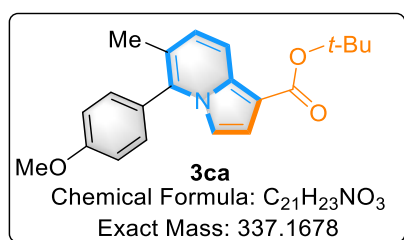

**tert-butyl 5-(4-methoxyphenyl)-6-methylindolizine-1-carboxylate (3ca):** The title compound **3ca** was prepared according to the general procedure as a light yellow oil (41.1 mg, 61%).

**<sup>1</sup>H NMR** (600 MHz, Chloroform-*d*)  $\delta$  8.08 (d,  $J$  = 9.1 Hz, 1H), 7.28 – 7.26 (m, 2H), 7.09 – 7.06 (m, 2H), 7.05 (d,  $J$  = 3.0 Hz, 1H), 7.00 (d,  $J$  = 9.2 Hz, 1H), 6.73 (dd,  $J$  = 3.0, 0.6 Hz, 1H), 3.90 (s, 3H), 2.08 (s, 3H), 1.62 (s, 9H).

**<sup>13</sup>C NMR** (151 MHz, Chloroform-*d*)  $\delta$  164.9, 160.1, 135.2, 134.6, 131.0, 126.1, 125.8, 119.7, 118.3, 115.4, 114.9, 112.5, 105.5, 79.3, 55.4, 28.7, 18.1.

**HRMS** (ESI)  $m/z$ :  $[M + H]^+$  Calcd for C<sub>21</sub>H<sub>24</sub>NO<sub>3</sub> 338.1751; found: 338.1739.

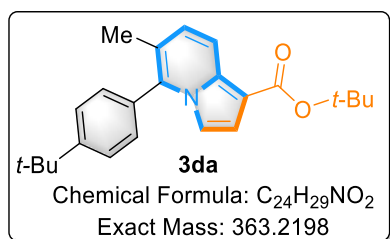

**tert-butyl 5-(4-(tert-butyl)phenyl)-6-methylindolizine-1-carboxylate (3da):** The title compound **3da** was prepared according to the general procedure as a light yellow oil (36.3 mg, 50%).



**<sup>1</sup>H NMR** (600 MHz, Chloroform-*d*) δ 8.08 (d, *J* = 9.2 Hz, 1H), 7.57 – 7.53 (m, 2H), 7.29 – 7.26 (m, 2H), 7.05 (d, *J* = 3.1 Hz, 1H), 7.01 (d, *J* = 9.2 Hz, 1H), 6.75 – 6.72 (m, 1H), 2.08 (s, 3H), 1.63 (s, 9H), 1.40 (s, 9H).

**<sup>13</sup>C NMR** (151 MHz, Chloroform-*d*) δ 164.9, 152.3, 135.1, 134.9, 130.6, 129.3, 126.3, 126.1, 119.5, 118.3, 115.4, 112.7, 105.5, 79.3, 34.9, 31.3, 28.7, 18.1.

**HRMS** (ESI) *m/z*: [M + H]<sup>+</sup> Calcd for C<sub>24</sub>H<sub>30</sub>NO<sub>2</sub> 364.2271; found: 364.2269.

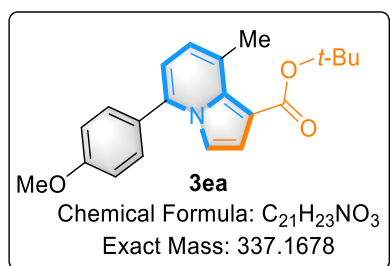

**tert-butyl 5-(4-methoxyphenyl)-8-methylindolizine-1-carboxylate (3ea):** The title compound **3ea** was prepared according to the general procedure as a brown oil (54.6 mg, 81%).

**<sup>1</sup>H NMR** (600 MHz, Chloroform-*d*) δ 7.47 – 7.41 (m, 2H), 7.21 (dd, *J* = 3.1, 0.9 Hz, 1H), 7.13 (dd, *J* = 3.1, 1.2 Hz, 1H), 7.04 – 6.99 (m, 2H), 6.81 (dq, *J* = 6.8, 1.1 Hz, 1H), 6.47 (d, *J* = 6.9 Hz, 1H), 3.88 (s, 3H), 2.76 (s, 3H), 1.60 (s, 9H).

**<sup>13</sup>C NMR** (151 MHz, Chloroform-*d*) δ 164.7, 160.2, 135.7, 135.0, 130.2, 128.7, 127.4, 123.3, 117.3, 114.5, 112.9, 111.8, 108.1, 79.5, 55.4, 28.5, 22.0.

**HRMS** (ESI) *m/z*: [M + H]<sup>+</sup> Calcd for C<sub>21</sub>H<sub>24</sub>NO<sub>3</sub> 338.1751; found: 338.1734.

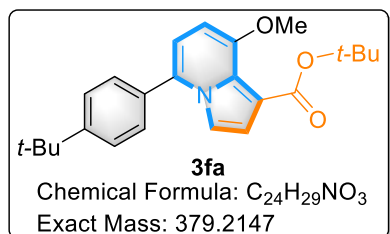

**tert-butyl 5-(4-(tert-butyl)phenyl)-8-methoxyindolizine-1-carboxylate (3fa):** The title compound **3fa** was prepared according to the general procedure as a yellow oil (59.1 mg, 78%).

**<sup>1</sup>H NMR** (600 MHz, Chloroform-*d*)  $\delta$  7.52 – 7.43 (m, 4H), 7.25 (s, 1H), 7.07 (d,  $J$  = 3.0 Hz, 1H), 6.49 (d,  $J$  = 7.6 Hz, 1H), 6.36 (d,  $J$  = 7.7 Hz, 1H), 3.98 (s, 3H), 1.61 (s, 9H), 1.38 (s, 9H).

**<sup>13</sup>C NMR** (151 MHz, Chloroform-*d*)  $\delta$  164.6, 152.1, 151.4, 132.0, 131.4, 128.6, 127.4, 125.9, 116.5, 112.8, 112.5, 108.6, 99.2, 79.5, 55.5, 34.8, 31.3, 28.5.

**HRMS** (ESI)  $m/z$ :  $[M + H]^+$  Calcd for C<sub>24</sub>H<sub>30</sub>NO<sub>3</sub> 380.2220; found: 380.2226.

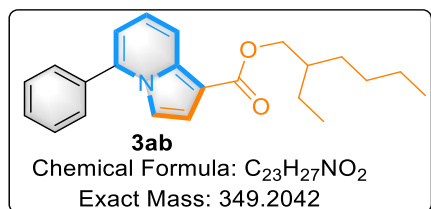

**2-ethylhexyl 5-phenylindolizine-1-carboxylate (3ab):** The title compound **3ab** was prepared according to the general procedure as a yellow oil (47.5 mg, 68%).

**<sup>1</sup>H NMR** (600 MHz, Chloroform-*d*)  $\delta$  8.23 (dd,  $J$  = 9.1, 1.4 Hz, 1H), 7.60 – 7.56 (m, 2H), 7.55 – 7.48 (m, 3H), 7.28 – 7.20 (m, 2H), 7.14 (dd,  $J$  = 9.1, 6.8 Hz, 1H), 6.65 (dd,  $J$  = 6.8, 1.3 Hz, 1H), 4.30 – 4.22 (m, 2H), 1.75 (p,  $J$  = 6.1 Hz, 1H), 1.54 – 1.31 (m, 8H), 0.97 (t,  $J$  = 7.5 Hz, 3H), 0.91 (t,  $J$  = 7.1 Hz, 3H).

**<sup>13</sup>C NMR** (151 MHz, Chloroform-*d*)  $\delta$  165.3, 138.1, 136.6, 134.7, 129.6, 129.2, 128.7, 122.6, 118.8, 116.0, 113.2, 112.2, 104.6, 66.0, 39.1, 30.8, 29.1, 24.2, 23.1, 14.1, 11.2.

**HRMS** (ESI)  $m/z$ :  $[M + H]^+$  Calcd for C<sub>23</sub>H<sub>28</sub>NO<sub>2</sub> 350.2115; found: 350.2102.

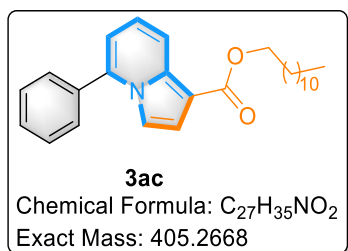

**dodecyl 5-phenylindolizine-1-carboxylate (3ac):** The title compound **3ac** was prepared according to the general procedure as a brown oil (50.2 mg, 62%).

**<sup>1</sup>H NMR** (600 MHz, Chloroform-*d*) δ 8.23 (d, *J* = 9.1 Hz, 1H), 7.59 (d, *J* = 7.3 Hz, 2H), 7.52 (dq, *J* = 13.8, 7.1 Hz, 3H), 7.27 (d, *J* = 2.8 Hz, 1H), 7.22 (d, *J* = 3.0 Hz, 1H), 7.14 (t, *J* = 7.9 Hz, 1H), 6.65 (d, *J* = 6.8 Hz, 1H), 4.32 (t, *J* = 6.7 Hz, 2H), 1.79 (p, *J* = 7.0 Hz, 2H), 1.47 (p, *J* = 7.4 Hz, 2H), 1.36 (q, *J* = 7.1 Hz, 2H), 1.27 (d, *J* = 11.8 Hz, 15H), 0.88 (t, *J* = 6.8 Hz, 3H).

**<sup>13</sup>C NMR** (151 MHz, Chloroform-*d*) δ 165.2, 138.1, 136.7, 134.7, 129.6, 129.2, 128.7, 122.6, 118.8, 115.9, 113.2, 112.2, 104.5, 63.8, 31.9, 29.7, 29.7, 29.6, 29.6, 29.4, 29.1, 26.2, 22.7, 14.13.

**HRMS** (ESI) *m/z*: [M + H]<sup>+</sup> Calcd for C<sub>27</sub>H<sub>36</sub>NO<sub>2</sub> 406.2741; found: 406.2727.

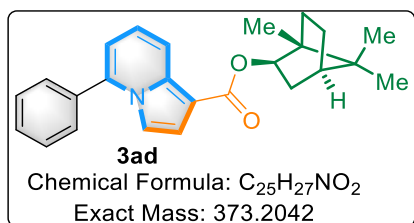

**(1R,2R,4R)-1,7,7-trimethylbicyclo[2.2.1]heptan-2-yl 5-phenylindolizine-1-carboxylate (3ad):** The title compound **3ad** was prepared according to the general procedure as a yellow oil (52.2 mg, 70%).

**<sup>1</sup>H NMR** (600 MHz, Chloroform-*d*) δ 8.29 – 8.23 (m, 1H), 7.60 – 7.55 (m, 2H), 7.55 – 7.48 (m, 3H), 7.25 (d, *J* = 3.0 Hz, 1H), 7.17 (d, *J* = 3.1 Hz, 1H), 7.13 (dd, *J* = 9.1, 6.8 Hz, 1H), 6.64 (dd, *J* = 6.8, 1.3 Hz, 1H), 4.94 (dd, *J* = 6.6, 5.0 Hz, 1H), 1.96 – 1.92 (m, 2H), 1.79 (p, *J* = 2.0 Hz, 1H), 1.74 (tdt, *J* = 9.5, 3.5, 1.8 Hz, 1H), 1.61 (td, *J* = 12.2, 4.3

Hz, 1H), 1.27 (ddd,  $J = 17.1, 8.5, 3.9$  Hz, 1H), 1.18 – 1.12 (m, 4H), 0.98 (s, 3H), 0.89 (s, 3H).

$^{13}\text{C}$  NMR (151 MHz, Chloroform- $d$ )  $\delta$  164.7, 138.1, 136.7, 134.7, 129.6, 129.2, 128.7, 122.6, 118.7, 115.9, 113.2, 112.1, 104.8, 80.1, 48.9, 47.0, 45.2, 39.3, 34.0, 27.2, 20.3, 20.2, 11.8.

HRMS (ESI)  $m/z$ :  $[\text{M} + \text{H}]^+$  Calcd for  $\text{C}_{25}\text{H}_{28}\text{NO}_2$  374.2115; found: 374.2100.

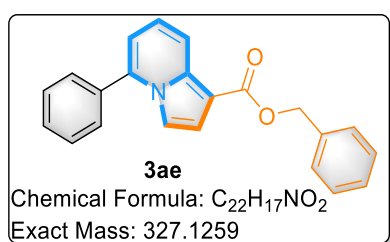

**benzyl 5-phenylindolizine-1-carboxylate (3ae):** The title compound **3ae** was prepared according to the general procedure as a brown oil (53.0mg, 81%).

$^1\text{H}$  NMR (600 MHz, Chloroform- $d$ )  $\delta$  8.24 (dd,  $J = 9.1, 1.2$  Hz, 1H), 7.60 – 7.56 (m, 2H), 7.55 – 7.50 (m, 3H), 7.50 – 7.47 (m, 2H), 7.38 (t,  $J = 7.5$  Hz, 2H), 7.34 – 7.30 (m, 1H), 7.26 (dd,  $J = 8.5, 2.7$  Hz, 2H), 7.14 (dd,  $J = 9.1, 6.8$  Hz, 1H), 6.66 (dd,  $J = 6.8, 1.3$  Hz, 1H), 5.39 (s, 2H).

$^{13}\text{C}$  NMR (151 MHz, Chloroform- $d$ )  $\delta$  164.8, 138.2, 137.2, 137.0, 134.6, 129.6, 129.2, 128.7, 128.5, 128.0, 127.9, 122.9, 118.8, 116.1, 113.3, 112.4, 104.0, 65.3.

HRMS (ESI)  $m/z$ :  $[\text{M} + \text{H}]^+$  Calcd for  $\text{C}_{22}\text{H}_{18}\text{NO}_2$  328.1332; found: 328.1326.

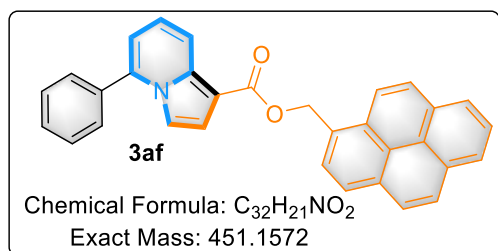

**pyren-1-ylmethyl 5-phenylindolizine-1-carboxylate (3af):** The title compound **3af** was prepared according to the general procedure as a light yellow solid (55.0 mg, 61%),

m.p. = 180.8–181.3 °C.

**<sup>1</sup>H NMR** (600 MHz, Chloroform-*d*) δ 8.45 (d, *J* = 9.2 Hz, 1H), 8.23 – 8.15 (m, 6H), 8.09 – 8.05 (m, 2H), 8.01 (t, *J* = 7.6 Hz, 1H), 7.56 – 7.46 (m, 5H), 7.25 – 7.23 (m, 2H), 7.05 (dd, *J* = 9.1, 6.8 Hz, 1H), 6.61 (dd, *J* = 6.9, 1.3 Hz, 1H), 6.10 (s, 2H).

**<sup>13</sup>C NMR** (151 MHz, Chloroform-*d*) δ 164.94, 138.19, 136.96, 134.54, 131.58, 131.27, 130.82, 130.07, 129.65, 129.59, 129.14, 128.67, 128.04, 127.66, 127.64, 127.46, 126.02, 125.38, 125.36, 124.71, 123.34, 122.98, 118.80, 116.19, 113.33, 112.41, 103.97, 64.03.

**HRMS** (ESI) *m/z*: [M + H]<sup>+</sup> Calcd for C<sub>32</sub>H<sub>22</sub>NO<sub>2</sub> 452.1645; found: 452.1631.

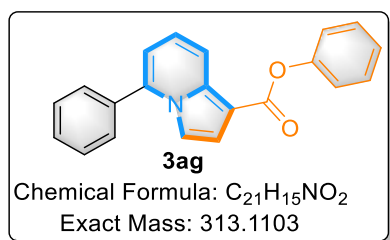

**phenyl 5-phenylindolizine-1-carboxylate (3ag):** The title compound **3ag** was prepared according to the general procedure as a brown oil (45.1 mg, 72%).

**<sup>1</sup>H NMR** (600 MHz, Chloroform-*d*) δ 8.30 (d, *J* = 9.0 Hz, 1H), 7.63 – 7.60 (m, 2H), 7.59 – 7.51 (m, 3H), 7.45 – 7.41 (m, 2H), 7.39 – 7.33 (m, 2H), 7.28 – 7.24 (m, 3H), 7.24 – 7.19 (m, 1H), 6.73 (dd, *J* = 6.8, 1.3 Hz, 1H).

**<sup>13</sup>C NMR** (151 MHz, Chloroform-*d*) δ 163.2, 151.2, 138.5, 137.7, 134.5, 129.7, 129.3, 129.2, 128.7, 125.3, 123.5, 122.2, 118.8, 116.4, 113.7, 112.8, 103.2.

**HRMS** (ESI) *m/z*: [M + H]<sup>+</sup> Calcd for C<sub>21</sub>H<sub>16</sub>NO<sub>2</sub> 314.1176; found: 314.1172.

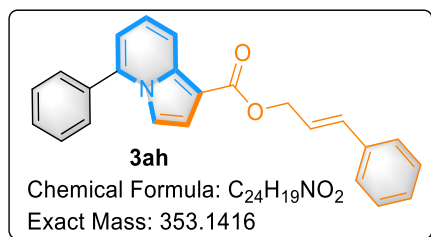

**cinnamyl 5-phenylindolizine-1-carboxylate (3ah):** The title compound **3ah** was

prepared according to the general procedure as a white solid (45.9 mg, 65%), m.p. = 111.8–112.1 °C.

**<sup>1</sup>H NMR** (600 MHz, Chloroform-*d*)  $\delta$  8.29 – 8.22 (m, 1H), 7.61 – 7.58 (m, 2H), 7.57 – 7.49 (m, 3H), 7.46 – 7.41 (m, 2H), 7.33 (dd,  $J$  = 8.5, 6.9 Hz, 2H), 7.28 (dd,  $J$  = 3.1, 0.6 Hz, 1H), 7.27 – 7.24 (m, 2H), 7.16 (dd,  $J$  = 9.0, 6.8 Hz, 1H), 6.75 (dt,  $J$  = 15.9, 1.5 Hz, 1H), 6.67 (dd,  $J$  = 6.9, 1.3 Hz, 1H), 6.47 (dt,  $J$  = 15.9, 6.3 Hz, 1H), 5.00 (dd,  $J$  = 6.3, 1.4 Hz, 2H).

**<sup>13</sup>C NMR** (151 MHz, Chloroform-*d*)  $\delta$  164.8, 138.2, 136.9, 136.6, 134.6, 133.4, 129.6, 129.2, 128.7, 128.6, 127.9, 126.6, 124.5, 122.9, 118.8, 116.0, 113.3, 112.4, 104.0, 64.2.

**HRMS** (ESI)  $m/z$ :  $[M + H]^+$  Calcd for C<sub>24</sub>H<sub>20</sub>NO<sub>2</sub> 354.1489; found: 354.1473.

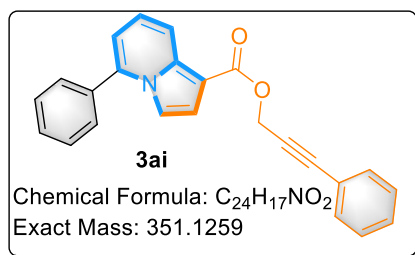

**3-phenylprop-2-yn-1-yl 5-phenylindolizine-1-carboxylate (3ai):** The title compound **3ai** was prepared according to the general procedure as a white solid (49.2 mg, 70%), m.p. = 102.5–103.6 °C.

**<sup>1</sup>H NMR** (600 MHz, Chloroform-*d*)  $\delta$  8.28 (dd,  $J$  = 9.1, 1.2 Hz, 1H), 7.61 – 7.57 (m, 2H), 7.57 – 7.47 (m, 5H), 7.31 (qd,  $J$  = 4.9, 2.6 Hz, 3H), 7.30 – 7.26 (m, 2H), 7.18 (dd,  $J$  = 9.1, 6.8 Hz, 1H), 6.68 (dd,  $J$  = 6.9, 1.2 Hz, 1H), 5.17 (s, 2H).

**<sup>13</sup>C NMR** (151 MHz, Chloroform-*d*)  $\delta$  164.1, 138.3, 137.2, 134.5, 132.0, 129.6, 129.2, 128.7, 128.6, 128.3, 123.2, 122.6, 118.8, 116.1, 113.5, 112.5, 103.4, 85.9, 84.2, 52.0.

**HRMS** (ESI)  $m/z$ :  $[M + H]^+$  Calcd for C<sub>24</sub>H<sub>18</sub>NO<sub>2</sub> 352.1332; found: 352.1328.

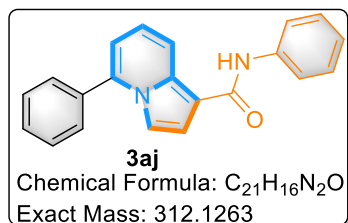

***N*,5-diphenylindolizine-1-carboxamide (3aj):** The title compound **3aj** was prepared according to the general procedure as a yellow oil (25.0 mg, 40%).

**<sup>1</sup>H NMR** (600 MHz, Chloroform-*d*) δ 8.46 (d, *J* = 9.1 Hz, 1H), 7.66 (d, *J* = 8.0 Hz, 2H), 7.62 – 7.51 (m, 6H), 7.36 (t, *J* = 7.7 Hz, 2H), 7.32 (d, *J* = 3.1 Hz, 1H), 7.17 – 7.08 (m, 2H), 7.00 (d, *J* = 3.1 Hz, 1H), 6.67 (d, *J* = 6.7 Hz, 1H).

**<sup>13</sup>C NMR** (151 MHz, Chloroform-*d*) δ 163.2, 138.7, 137.8, 136.5, 134.6, 129.6, 129.2, 129.0, 128.7, 123.6, 122.5, 119.9, 119.3, 113.5, 111.9, 111.7, 107.1.

**HRMS** (ESI) *m/z*: [M + H]<sup>+</sup> Calcd for C<sub>21</sub>H<sub>17</sub>N<sub>2</sub>O 313.1335; found: 313.1337.

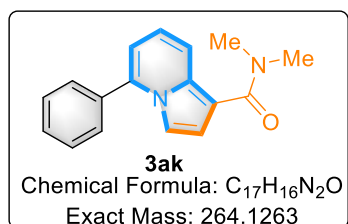

***N,N*-dimethyl-5-phenylindolizine-1-carboxamide (3ak):** The title compound **3ak** was prepared according to the general procedure as a yellow-brown oil (20.1 mg, 38%).

**<sup>1</sup>H NMR** (600 MHz, Chloroform-*d*) δ 7.94 (ddd, *J* = 9.1, 1.3, 0.6 Hz, 1H), 7.61 – 7.57 (m, 2H), 7.55 – 7.48 (m, 3H), 7.27 – 7.26 (m, 1H), 7.00 (dd, *J* = 9.1, 6.7 Hz, 1H), 6.90 (d, *J* = 3.0 Hz, 1H), 6.56 (dd, *J* = 6.7, 1.3 Hz, 1H), 3.19 (s, 6H).

**<sup>13</sup>C NMR** (151 MHz, Chloroform-*d*) δ 167.9, 137.3, 135.5, 135.0, 129.4, 129.1, 128.6, 120.7, 118.9, 114.3, 112.6, 110.8, 107.4, 29.7.

**HRMS** (ESI) *m/z*: [M + H]<sup>+</sup> Calcd for C<sub>17</sub>H<sub>17</sub>N<sub>2</sub>O 265.1335; found: 265.1332.

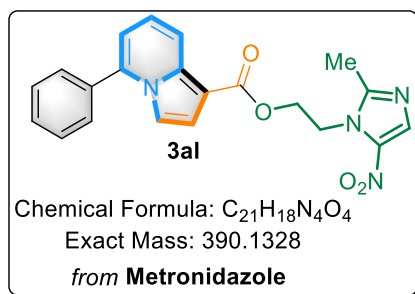

**2-(2-methyl-5-nitro-1H-imidazol-1-yl)ethyl 5-phenylindolizine-1-carboxylate (3al):**

The title compound **3al** was prepared according to the general procedure as a yellow-brown oil (30.2 mg, 40%).

<sup>1</sup>H NMR (600 MHz, Chloroform-*d*) δ 8.13 – 8.08 (m, 1H), 7.99 (s, 1H), 7.61 – 7.50 (m, 5H), 7.26 – 7.25 (m, 1H), 7.18 (dd, *J* = 9.0, 6.8 Hz, 1H), 7.05 (d, *J* = 3.2 Hz, 1H), 6.70 (dd, *J* = 6.8, 1.3 Hz, 1H), 4.75 – 4.65 (m, 4H), 2.48 (s, 3H).

<sup>13</sup>C NMR (151 MHz, Chloroform-*d*) δ 164.0, 151.2, 138.5, 137.4, 134.3, 133.3, 129.8, 129.2, 128.7, 123.6, 118.4, 115.6, 113.7, 112.8, 102.6, 61.3, 45.9, 14.4.

HRMS (ESI) *m/z*: [M + H]<sup>+</sup> Calcd for C<sub>21</sub>H<sub>19</sub>N<sub>4</sub>O<sub>4</sub> 391.1401; found: 391.1405.

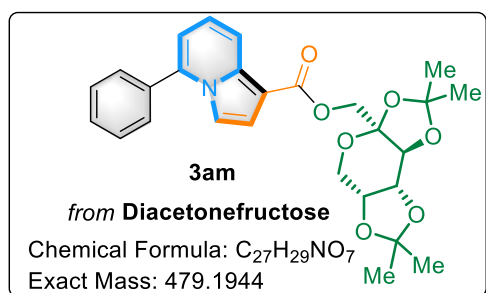

**((3a*S*,5a*R*,8a*R*,8b*S*)-2,2,7,7-tetramethyltetrahydro-3a*H*-bis([1,3]dioxolo)[4,5-**

**b:4',5'-d]pyran-3a-yl)methyl 5-phenylindolizine-1-carboxylate (3am):** The title compound **3am** was prepared according to the general procedure as a light yellow solid (60.4 mg, 63%), m.p. = 142.6–143.1 °C.

<sup>1</sup>H NMR (600 MHz, Chloroform-*d*) δ 8.31 (dd, *J* = 9.2, 1.2 Hz, 1H), 7.61 – 7.57 (m, 2H), 7.56 – 7.48 (m, 3H), 7.26 (d, *J* = 3.5 Hz, 2H), 7.21 (d, *J* = 3.1 Hz, 1H), 7.16 (dd, *J* = 9.1, 6.8 Hz, 1H), 6.67 (dd, *J* = 6.8, 1.3 Hz, 1H), 4.69 (d, *J* = 11.7 Hz, 1H), 4.66 (dd,



$J = 7.9, 2.6$  Hz, 1H), 4.53 (d,  $J = 2.6$  Hz, 1H), 4.36 (d,  $J = 11.7$  Hz, 1H), 4.27 (dd,  $J = 8.0, 1.7$  Hz, 1H), 3.98 (dd,  $J = 13.0, 1.9$  Hz, 1H), 3.84 – 3.79 (m, 1H), 1.55 (s, 3H), 1.52 (s, 3H), 1.40 (s, 3H), 1.36 (s, 3H).

$^{13}\text{C}$  NMR (151 MHz, Chloroform-*d*)  $\delta$  164.0, 138.2, 134.5, 129.6, 129.2, 128.7, 123.0, 118.9, 115.7, 113.5, 112.3, 109.2, 108.8, 103.5, 102.1, 71.0, 70.5, 70.3, 63.6, 61.3, 26.6, 26.0, 25.6, 24.1.

HRMS (ESI)  $m/z$ :  $[\text{M} + \text{H}]^+$  Calcd for  $\text{C}_{27}\text{H}_{30}\text{NO}_7$  480.2017; found: 480.2020.

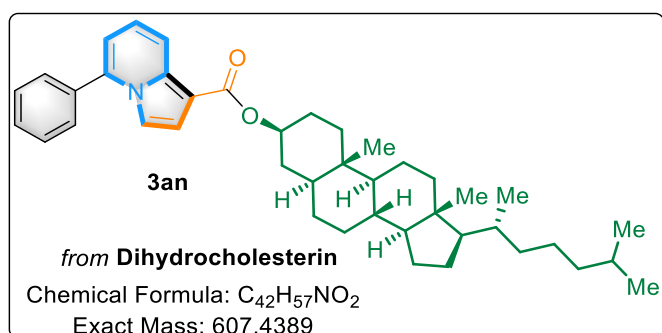

**(3*S*,8*R*,9*S*,10*S*,13*R*,14*S*,17)-10,13-dimethyl-17-((*R*)-6-methylheptan-2-yl)hexadecahydro-1*H*-cyclopenta[*a*]phenanthren-3-yl 5-phenylindolizine-1-carboxylate (3an)**: The title compound **3an** was prepared according to the general procedure as a light yellow solid (60.8 mg, 55%), m.p. = 200.1–200.6 °C.

$^1\text{H}$  NMR (600 MHz, Chloroform-*d*)  $\delta$  8.22 (dd,  $J = 9.2, 1.3$  Hz, 1H), 7.59 – 7.48 (m, 5H), 7.27 – 7.24 (m, 1H), 7.21 (d,  $J = 3.1$  Hz, 1H), 7.12 (dd,  $J = 9.1, 6.8$  Hz, 1H), 6.63 (dd,  $J = 6.8, 1.3$  Hz, 1H), 4.97 (tt,  $J = 11.3, 4.9$  Hz, 1H), 1.99 (tt,  $J = 12.7, 3.7$  Hz, 2H), 1.86 – 1.75 (m, 3H), 1.72 – 1.63 (m, 2H), 1.62 – 1.48 (m, 5H), 1.39 – 1.23 (m, 9H), 1.18 – 1.07 (m, 6H), 1.05 – 0.96 (m, 3H), 0.91 (d,  $J = 6.6$  Hz, 3H), 0.89 (s, 3H), 0.87 (d,  $J = 2.8$  Hz, 3H), 0.86 (d,  $J = 2.8$  Hz, 3H), 0.73 – 0.64 (m, 4H).

$^{13}\text{C}$  NMR (151 MHz, Chloroform-*d*)  $\delta$  164.8, 138.1, 136.6, 134.7, 129.5, 129.1, 128.7, 122.5, 118.9, 116.0, 113.1, 112.1, 104.9, 72.8, 56.5, 56.3, 54.3, 44.9, 42.6, 40.1, 39.5, 37.0, 36.2, 35.8, 35.6, 35.6, 34.6, 32.1, 28.7, 28.3, 28.0, 24.3, 23.9, 22.9, 22.6, 21.3, 18.7, 12.4, 12.1.

HRMS (ESI)  $m/z$ :  $[\text{M} + \text{H}]^+$  Calcd for  $\text{C}_{42}\text{H}_{58}\text{NO}_2$  608.4462; found: 608.4452.

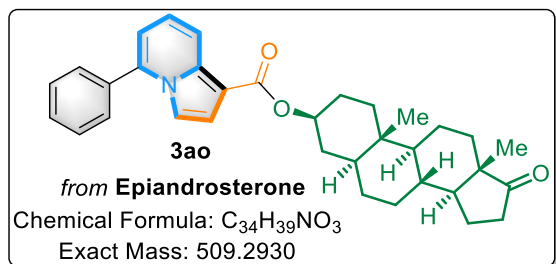

**(3S,5S,8R,9S,10S,13S,14S)-10,13-dimethyl-17-oxohexadecahydro-1H-cyclopenta[a]phenanthren-3-yl 5-phenylindolizine-1-carboxylate (3ao):** The title compound **3ao** was prepared according to the general procedure as a light yellow solid (48.9 mg, 48%), m.p. = 204.6–204.8 °C.

<sup>1</sup>H NMR (600 MHz, Chloroform-*d*) δ 8.22 (dd, *J* = 9.1, 1.3 Hz, 1H), 7.62 – 7.48 (m, 5H), 7.26 (d, *J* = 3.0 Hz, 1H), 7.21 (d, *J* = 3.1 Hz, 1H), 7.13 (dd, *J* = 9.0, 6.8 Hz, 1H), 6.64 (dd, *J* = 6.8, 1.3 Hz, 1H), 4.97 (tt, *J* = 11.3, 4.9 Hz, 1H), 2.49 – 2.38 (m, 1H), 2.08 (dt, *J* = 19.2, 9.1 Hz, 1H), 2.04 – 1.99 (m, 1H), 1.98 – 1.91 (m, 1H), 1.85 – 1.77 (m, 4H), 1.73 – 1.66 (m, 2H), 1.60 – 1.47 (m, 3H), 1.42 – 1.23 (m, 6H), 1.18 – 1.10 (m, 1H), 1.06 – 0.97 (m, 1H), 0.92 (s, 3H), 0.87 (s, 3H), 0.81 – 0.73 (m, 1H).

<sup>13</sup>C NMR (151 MHz, Chloroform-*d*) δ 164.7, 138.1, 136.6, 134.6, 129.6, 129.1, 128.7, 122.6, 118.9, 116.0, 113.2, 112.2, 72.6, 54.4, 51.4, 47.8, 44.8, 36.9, 35.9, 35.8, 35.1, 34.5, 31.6, 30.9, 28.4, 28.0, 21.8, 20.5, 13.8, 12.4.

HRMS (ESI) *m/z*: [M + H]<sup>+</sup> Calcd for C<sub>34</sub>H<sub>40</sub>NO<sub>3</sub> 510.3003; found: 510.3004.

## 5. Gram-scale synthesis

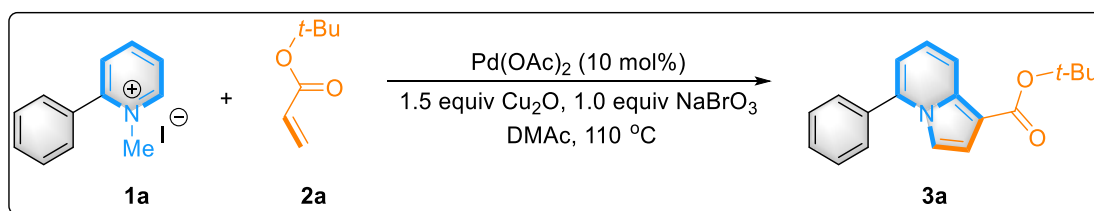

To a 150 mL Schlenk tube was charged with **1a** (1.2 g, 4.04 mmol), Pd(OAc) (89.8 mg, 0.4 mmol), **2a** (2.07 g, 16.2 mmol), NaBrO<sub>3</sub> (610.0 mg, 4.04 mmol, 1.0 equiv), Cu<sub>2</sub>O (866.6 mg, 6.06 mmol, 1.5 equiv) and DMAc (dimethylacetamide, 40.0 mL) under an air atmosphere. The tube was evacuated and filled with Ar (1 atm), and stirred at rt for 1 min for proper mixing of the reactants. Then the mixture heated at 110 °C (oil bath) with vigorous stirring for 24 h. After that, the reaction mixture was cooled to rt, diluted with ethyl acetate, washed with water, dried by anhydrous sodium sulfate and concentrated in *vacuo* to give the residue. The crude product was separated by column chromatography on silica gel (elution solvent: EtOAc/petroleum ether = 1/20) to afford the title compound **3a** (924 mg, 78%).

## 6. Synthesis of compound 6

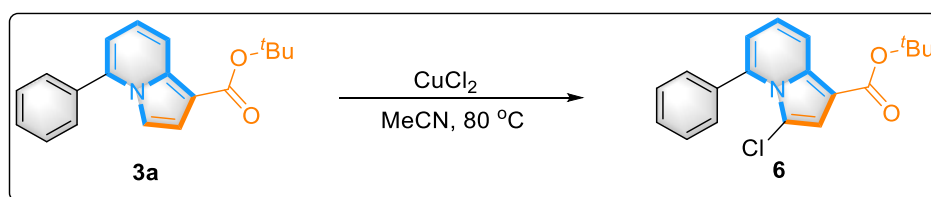

Synthesis method:<sup>[2]</sup> Indolizine **3a** (58.6 mg, 0.2 mmol) and CuCl<sub>2</sub> (40.3 mg, 0.3 mmol) were added to a flask. Then MeCN (1 mL) was added through a syringe and the mixture was stirred at 80 °C for 24 hours under air atmosphere. After the reaction was complete, the reaction was quenched with saturated NH<sub>4</sub>Cl solution and extracted with EtOAc. The combined organic layers were washed with water, brine, then dried over Na<sub>2</sub>SO<sub>4</sub>. The solvents were evaporated under reduced pressure, and the residue was subjected to flash column chromatography with ethyl acetate/petroleum ether (1 : 20) as eluent to obtain the desired product **6** as a solid. (38.5 mg, 62% yield), m.p. = 179.8–180.1 °C. <sup>1</sup>H NMR (600 MHz, Chloroform-*d*) δ 8.29 (dd, *J* = 9.1, 1.4 Hz, 1H), 7.49 – 7.37 (m, 5H), 7.11 (s, 1H), 7.06 (dd, *J* = 9.1, 6.8 Hz, 1H), 6.60 (dd, *J* = 6.8, 1.4 Hz, 1H), 1.62 (s, 9H).

$^{13}\text{C}$  NMR (151 MHz, Chloroform-*d*)  $\delta$  163.8, 137.7, 136.7, 135.0, 129.8, 128.9, 127.5, 121.5, 119.0, 117.0, 116.6, 110.1, 105.6, 80.0, 28.6.

HRMS (ESI)  $m/z$ :  $[\text{M} + \text{H}]^+$  Calcd for  $\text{C}_{19}\text{H}_{19}\text{ClNO}_2$  328.1099; found: 328.1092.

## 7. Synthesis of compound 7

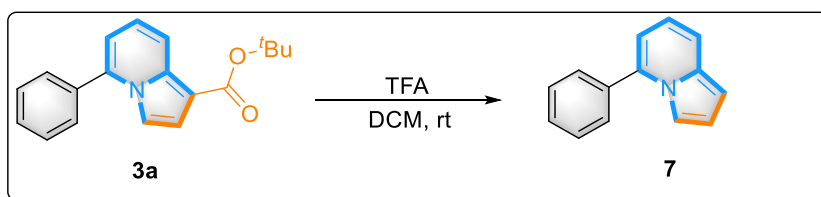

Synthesis method: A solution of indolizine **3a** (58.6 mg, 0.2 mmol) and TFA (15  $\mu\text{L}$ , 0.2 mmol) in DCM (2 mL) was stirred at rt for 19 h. After the reaction was complete, the reaction mixture was concentrated to give the crude. The crude product was purified by flash column chromatography on silica gel (EtOAc/Petroleum = 50/1) to obtain the desired compound **7** as a dark green oil (18.5 mg, 48%).

$^1\text{H}$  NMR (600 MHz, Chloroform-*d*)  $\delta$  7.65 – 7.61 (m, 2H), 7.53 – 7.45 (m, 3H), 7.39 (dt,  $J = 9.0, 0.9$  Hz, 1H), 7.37 – 7.34 (m, 1H), 6.78 – 6.72 (m, 2H), 6.52 (dd,  $J = 3.9, 1.4$  Hz, 1H), 6.41 (dd,  $J = 6.6, 1.3$  Hz, 1H).

$^{13}\text{C}$  NMR (151 MHz, Chloroform-*d*)  $\delta$  136.98, 135.68, 134.00, 129.07, 128.98, 128.54, 118.29, 117.31, 113.27, 111.15, 111.11, 99.54.

HRMS (ESI)  $m/z$ :  $[\text{M} + \text{H}]^+$  Calcd for  $\text{C}_{14}\text{H}_{12}\text{N}$  194.0964; found: 194.0967.

## 8. Synthesis of compound 8

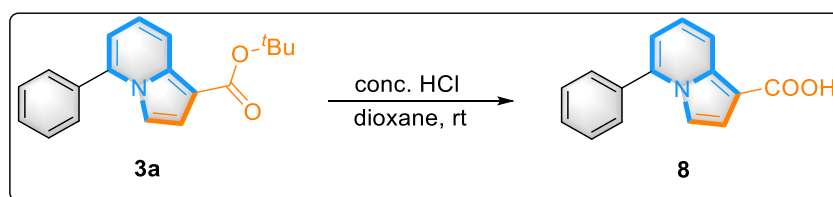

Synthesis method: A solution of indolizine **3a** (58.6 mg, 0.2 mmol) and conc. HCl (13  $\mu$ L, 0.4 mmol) in DCM (2 mL) was stirred at rt for 24 h. After the reaction was complete, the reaction mixture was concentrated to give the crude. The crude product was purified by flash column chromatography on silica gel (EtOAc/Petroleum = 1/1) to obtain the desired compound **8** as a black oil (35.5 mg, 75%).

**<sup>1</sup>H NMR** (600 MHz, Chloroform-*d*)  $\delta$  8.29 (d, *J* = 9.0 Hz, 1H), 7.60 (dd, *J* = 7.9, 1.7 Hz, 2H), 7.58 – 7.49 (m, 3H), 7.31 – 7.27 (m, 2H), 7.23 – 7.18 (m, 1H), 6.71 (dd, *J* = 6.8, 1.3 Hz, 1H).

**<sup>13</sup>C NMR** (151 MHz, Chloroform-*d*)  $\delta$  168.9, 138.4, 134.5, 129.7, 129.2, 128.7, 123.4, 118.9, 116.6, 113.6, 112.8, 103.2.

**HRMS** (ESI) *m/z*: [M + H]<sup>+</sup> Calcd for C<sub>15</sub>H<sub>12</sub>NO<sub>2</sub> 238.0863; found: 238.0857.

## 9. X-ray crystallographic data of compound 3c

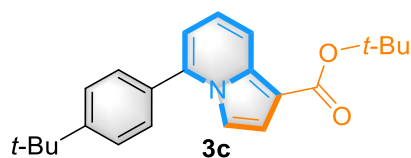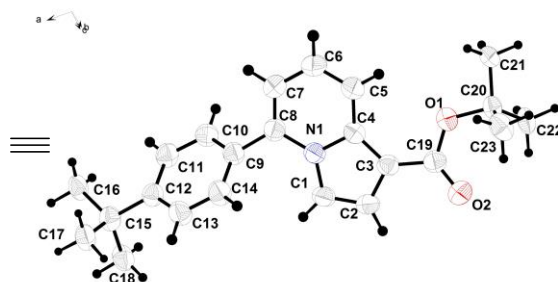

CCDC: 2048332

Figure S1 Molecular Structure of compound 3c

Table S1 Crystal data and structure refinement for 3c

|                                    |                                                               |
|------------------------------------|---------------------------------------------------------------|
| Identification code                | 3c                                                            |
| Empirical formula                  | C <sub>23</sub> H <sub>27</sub> NO <sub>2</sub>               |
| Formula weight                     | 349.45                                                        |
| Temperature/K                      | 293.15                                                        |
| Crystal system                     | monoclinic                                                    |
| Space group                        | P2 <sub>1</sub> /c                                            |
| a/Å                                | 17.6069(3)                                                    |
| b/Å                                | 11.3574(2)                                                    |
| c/Å                                | 10.3434(2)                                                    |
| α/°                                | 90                                                            |
| β/°                                | 102.098(2)                                                    |
| γ/°                                | 90                                                            |
| Volume/Å <sup>3</sup>              | 2022.42(6)                                                    |
| Z                                  | 4                                                             |
| ρ <sub>calc</sub> /cm <sup>3</sup> | 1.148                                                         |
| μ/mm <sup>-1</sup>                 | 0.567                                                         |
| F(000)                             | 752.0                                                         |
| Radiation                          | Cu Kα (λ = 1.54184)                                           |
| 2θ range for data collection/°     | 5.134 to 148.182                                              |
| Index ranges                       | -21 ≤ h ≤ 21, -13 ≤ k ≤ 12, -12 ≤ l ≤ 10                      |
| Reflections collected              | 10931                                                         |
| Independent reflections            | 3976 [R <sub>int</sub> = 0.0346, R <sub>sigma</sub> = 0.0357] |
| Data/restraints/parameters         | 3976/0/242                                                    |

**Table S1 continued**

|                                                |                                  |
|------------------------------------------------|----------------------------------|
| Goodness-of-fit on $F^2$                       | 1.040                            |
| Final R indexes [ $I \geq 2\sigma(I)$ ]        | $R_1 = 0.0471$ , $wR_2 = 0.1398$ |
| Final R indexes [all data]                     | $R_1 = 0.0543$ , $wR_2 = 0.1465$ |
| Largest diff. peak/hole / $e \text{ \AA}^{-3}$ | 0.16/-0.17                       |

**Table S2 Bond lengths for 3c**

| Atom | Atom | Length/ $\text{\AA}$ | Atom | Atom | Length/ $\text{\AA}$ |
|------|------|----------------------|------|------|----------------------|
| O1   | C19  | 1.3488(16)           | C8   | C9   | 1.4850(18)           |
| O1   | C20  | 1.4716(16)           | C9   | C10  | 1.385(2)             |
| O2   | C19  | 1.2084(17)           | C9   | C14  | 1.392(2)             |
| N1   | C1   | 1.3856(16)           | C10  | C11  | 1.3842(19)           |
| N1   | C4   | 1.4028(16)           | C11  | C12  | 1.396(2)             |
| N1   | C8   | 1.3907(17)           | C12  | C13  | 1.395(2)             |
| C1   | C2   | 1.359(2)             | C12  | C15  | 1.5315(18)           |
| C2   | C3   | 1.4121(18)           | C13  | C14  | 1.379(2)             |
| C3   | C4   | 1.4029(18)           | C15  | C16  | 1.524(2)             |
| C3   | C19  | 1.4516(18)           | C15  | C17  | 1.530(2)             |
| C4   | C5   | 1.4080(19)           | C15  | C18  | 1.524(2)             |
| C5   | C6   | 1.352(2)             | C20  | C21  | 1.519(3)             |
| C6   | C7   | 1.414(2)             | C20  | C22  | 1.511(2)             |
| C7   | C8   | 1.355(2)             | C20  | C23  | 1.504(3)             |

**Table S3 Bond Angles for 3c**

| Atom | Atom | Atom | Angle/     | Atom | Atom | Atom | Angle/     |
|------|------|------|------------|------|------|------|------------|
| C19  | O1   | C20  | 122.22(11) | C10  | C11  | C12  | 121.47(13) |
| C1   | N1   | C4   | 108.65(11) | C11  | C12  | C15  | 122.42(12) |
| C1   | N1   | C8   | 129.35(11) | C13  | C12  | C11  | 116.79(12) |
| C8   | N1   | C4   | 121.94(11) | C13  | C12  | C15  | 120.75(12) |
| C2   | C1   | N1   | 108.41(12) | C14  | C13  | C12  | 121.81(13) |
| C1   | C2   | C3   | 108.92(12) | C13  | C14  | C9   | 120.90(13) |
| C2   | C3   | C19  | 124.29(12) | C12  | C15  | C17  | 110.40(12) |
| C4   | C3   | C2   | 107.07(12) | C16  | C15  | C12  | 111.81(13) |
| C4   | C3   | C19  | 128.62(12) | C16  | C15  | C17  | 107.69(14) |
| N1   | C4   | C5   | 118.14(12) | C18  | C15  | C12  | 108.09(12) |
| C3   | C4   | N1   | 106.94(11) | C18  | C15  | C16  | 110.64(17) |
| C3   | C4   | C5   | 134.92(12) | C18  | C15  | C17  | 108.16(16) |
| C6   | C5   | C4   | 120.04(13) | O1   | C19  | C3   | 112.18(11) |
| C5   | C6   | C7   | 120.34(14) | O2   | C19  | O1   | 123.76(13) |
| C8   | C7   | C6   | 121.42(14) | O2   | C19  | C3   | 124.05(13) |
| N1   | C8   | C9   | 118.83(12) | O1   | C20  | C21  | 101.83(12) |

**Table S3 continued**

|     |     |     |            |     |     |     |            |
|-----|-----|-----|------------|-----|-----|-----|------------|
| C7  | C8  | N1  | 118.09(12) | O1  | C20 | C22 | 110.34(13) |
| C7  | C8  | C9  | 123.07(13) | O1  | C20 | C23 | 109.56(13) |
| C10 | C9  | C8  | 119.99(12) | C22 | C20 | C21 | 110.34(16) |
| C10 | C9  | C14 | 117.89(13) | C23 | C20 | C21 | 110.48(17) |
| C14 | C9  | C8  | 122.01(12) | C23 | C20 | C22 | 113.66(18) |
| C9  | C10 | C11 | 121.15(13) |     |     |     |            |

**Table S4 Torsion Angles for 3c**

| A  | B  | C   | D   | Angle/°     | A   | B   | C   | D   | Angle/°     |
|----|----|-----|-----|-------------|-----|-----|-----|-----|-------------|
| N1 | C1 | C2  | C3  | -0.34(16)   | C8  | N1  | C1  | C2  | 178.16(13)  |
| N1 | C4 | C5  | C6  | -1.1(2)     | C8  | N1  | C4  | C3  | -178.46(12) |
| N1 | C8 | C9  | C10 | -129.62(14) | C8  | N1  | C4  | C5  | 1.07(19)    |
| N1 | C8 | C9  | C14 | 54.18(19)   | C8  | C9  | C10 | C11 | -176.20(13) |
| C1 | N1 | C4  | C3  | -0.77(14)   | C8  | C9  | C14 | C13 | 176.55(14)  |
| C1 | N1 | C4  | C5  | 178.76(13)  | C9  | C10 | C11 | C12 | -0.4(2)     |
| C1 | N1 | C8  | C7  | -177.09(14) | C10 | C9  | C14 | C13 | 0.3(2)      |
| C1 | N1 | C8  | C9  | 3.8(2)      | C10 | C11 | C12 | C13 | 0.2(2)      |
| C1 | C2 | C3  | C4  | -0.14(16)   | C10 | C11 | C12 | C15 | -177.51(13) |
| C1 | C2 | C3  | C19 | 178.43(13)  | C11 | C12 | C13 | C14 | 0.3(2)      |
| C2 | C3 | C4  | N1  | 0.55(15)    | C11 | C12 | C15 | C16 | -20.3(2)    |
| C2 | C3 | C4  | C5  | -178.86(16) | C11 | C12 | C15 | C17 | -140.17(15) |
| C2 | C3 | C19 | O1  | 169.77(12)  | C11 | C12 | C15 | C18 | 101.71(19)  |
| C2 | C3 | C19 | O2  | -10.7(2)    | C12 | C13 | C14 | C9  | -0.5(3)     |
| C3 | C4 | C5  | C6  | 178.29(16)  | C13 | C12 | C15 | C16 | 162.11(16)  |
| C4 | N1 | C1  | C2  | 0.70(15)    | C13 | C12 | C15 | C17 | 42.24(19)   |
| C4 | N1 | C8  | C7  | 0.1(2)      | C13 | C12 | C15 | C18 | -75.9(2)    |



## 10. Computational Studies

All the calculations were performed using the Gaussian 09 programs.<sup>[3]</sup> All of the structures were fully optimized with the B3LYP<sup>[4-5]</sup> method and Ahlrichs' split-valence def2-SVP basis set.<sup>[6]</sup> Grimmes's DFT-D3 dispersion correction was used to describe the van der waals interaction.<sup>[7]</sup> Vibrational frequency calculations were performed to ensure that a transition state has only one imaginary frequency and a local minimum has no imaginary frequency. Transition states connecting relevant minima were further examined by running intrinsic reaction coordinate (IRC) calculations.

### Cartesian Coordinates And Energy

#### 1a

|   |          |          |          |
|---|----------|----------|----------|
| C | -2.01748 | 0.18613  | -0.59076 |
| C | -0.62034 | 0.20849  | -0.55415 |
| C | 0.04890  | 1.25461  | 0.09905  |
| C | -0.69032 | 2.28971  | 0.70130  |
| C | -2.08475 | 2.26366  | 0.65557  |
| C | -2.75000 | 1.21159  | 0.01465  |
| H | -2.53436 | -0.63500 | -1.09341 |
| H | -0.04297 | -0.59117 | -1.02489 |
| H | -0.16037 | 3.11886  | 1.18070  |
| H | -2.65479 | 3.07397  | 1.11638  |
| H | -3.84230 | 1.19423  | -0.01661 |
| C | 1.53092  | 1.33337  | 0.09987  |
| C | 2.24408  | 1.47306  | -1.07870 |
| C | 3.63851  | 1.68445  | -1.05096 |

|   |         |         |          |
|---|---------|---------|----------|
| H | 1.69427 | 1.45583 | -2.01985 |
| C | 3.51070 | 1.74168 | 1.34509  |
| C | 4.26592 | 1.84969 | 0.16724  |
| H | 4.19880 | 1.77236 | -1.98409 |
| H | 3.97571 | 1.74740 | 2.32772  |
| H | 5.32311 | 2.10345 | 0.24683  |
| N | 2.21292 | 1.32499 | 1.29469  |
| C | 1.53723 | 1.14793 | 2.58351  |
| H | 1.35399 | 2.14633 | 3.01730  |
| H | 0.59872 | 0.60210 | 2.45034  |
| H | 2.19891 | 0.58179 | 3.25265  |
| I | 2.90070 | 4.59498 | 2.02063  |

**2a**

|   |          |         |          |
|---|----------|---------|----------|
| C | -0.02359 | 0.38339 | 0.04411  |
| O | 1.15233  | 0.09007 | 0.04629  |
| O | -0.51062 | 1.63443 | 0.04152  |
| C | 0.35496  | 2.81785 | 0.04147  |
| C | 1.21252  | 2.83648 | -1.22728 |
| H | 1.76791  | 3.78562 | -1.28291 |
| H | 1.92854  | 2.00525 | -1.23104 |
| H | 0.57209  | 2.75876 | -2.11962 |
| C | -0.64771 | 3.97168 | 0.03733  |
| H | -1.29223 | 3.92457 | 0.92819  |

|   |          |          |          |
|---|----------|----------|----------|
| H | -0.11854 | 4.93665  | 0.03704  |
| H | -1.28818 | 3.92183  | -0.85631 |
| C | 1.20722  | 2.84069  | 1.31378  |
| H | 1.76230  | 3.79004  | 1.36868  |
| H | 0.56286  | 2.76589  | 2.20357  |
| H | 1.92313  | 2.00944  | 1.32343  |
| C | -1.10172 | -0.64616 | 0.04387  |
| H | -0.71781 | -1.67000 | 0.04579  |
| C | -2.41254 | -0.38067 | 0.04185  |
| H | -2.77558 | 0.65008  | 0.04007  |
| H | -3.15336 | -1.18507 | 0.04197  |

CH<sub>3</sub>COOH

|   |          |          |          |
|---|----------|----------|----------|
| H | 0.18879  | -2.01890 | -6.43166 |
| C | -1.37258 | -2.78759 | -5.72391 |
| O | -2.09274 | -2.07994 | -6.38143 |
| C | -1.82179 | -3.84342 | -4.74615 |
| H | -2.91699 | -3.87931 | -4.72052 |
| H | -1.41454 | -4.82250 | -5.04227 |
| H | -1.42412 | -3.61615 | -3.74494 |
| O | -0.02413 | -2.71551 | -5.78712 |

Pd(CH<sub>3</sub>COO)<sub>2</sub>

|   |          |         |         |
|---|----------|---------|---------|
| C | -1.03762 | 0.92592 | 0.13815 |
|---|----------|---------|---------|

|    |          |          |          |
|----|----------|----------|----------|
| O  | 0.19381  | 0.79809  | -0.16042 |
| O  | -1.41614 | 2.08805  | 0.49689  |
| C  | -1.99683 | -0.21649 | 0.04680  |
| H  | -2.68413 | -0.19427 | 0.90431  |
| H  | -2.59775 | -0.10091 | -0.86969 |
| H  | -1.45316 | -1.16896 | 0.00370  |
| C  | 2.04630  | 4.68219  | 0.30919  |
| O  | 2.42716  | 3.51809  | -0.03933 |
| O  | 0.81678  | 4.80758  | 0.61705  |
| C  | 2.98615  | 5.84426  | 0.32598  |
| H  | 3.01704  | 6.28748  | -0.68280 |
| H  | 2.63369  | 6.60643  | 1.03349  |
| H  | 3.99880  | 5.50446  | 0.58281  |
| Pd | 0.50531  | 2.80308  | 0.22837  |

**CH<sub>3</sub>COOCu**

|    |         |          |          |
|----|---------|----------|----------|
| C  | 3.60601 | -2.25711 | -7.86007 |
| O  | 4.54683 | -1.65698 | -8.45844 |
| O  | 3.01744 | -1.75289 | -6.85588 |
| C  | 3.16837 | -3.62512 | -8.34156 |
| H  | 3.39066 | -4.36623 | -7.55785 |
| H  | 2.07831 | -3.62914 | -8.48989 |
| H  | 3.68347 | -3.90078 | -9.26973 |
| Cu | 4.27932 | -0.12935 | -7.07268 |

**CuI**

|    |          |         |         |
|----|----------|---------|---------|
| I  | -0.57809 | 0.07060 | 0.00000 |
| Cu | -2.97451 | 0.07060 | 0.00000 |

**A1**

|   |          |          |          |
|---|----------|----------|----------|
| C | 1.51991  | 2.46929  | 2.27066  |
| C | 0.61582  | 1.45001  | 1.96753  |
| C | -0.60110 | 1.76637  | 1.33639  |
| C | -0.90453 | 3.10762  | 1.03713  |
| C | 0.00265  | 4.11923  | 1.35095  |
| C | 1.22019  | 3.79948  | 1.96273  |
| H | 2.47334  | 2.21587  | 2.73959  |
| H | 0.84778  | 0.40512  | 2.18659  |
| H | -1.86193 | 3.36531  | 0.57846  |
| H | -0.24260 | 5.15911  | 1.12236  |
| H | 1.93470  | 4.59152  | 2.20089  |
| C | -1.56921 | 0.68467  | 1.05965  |
| C | -1.90953 | -0.23669 | 2.06008  |
| C | -2.87629 | -1.20579 | 1.83772  |
| H | -1.38311 | -0.18047 | 3.00901  |
| C | -3.15724 | -0.34604 | -0.37064 |
| C | -3.53952 | -1.23996 | 0.60656  |
| H | -3.11005 | -1.93295 | 2.61734  |

|    |          |          |          |
|----|----------|----------|----------|
| H  | -3.58259 | -0.35840 | -1.37186 |
| H  | -4.31054 | -1.97822 | 0.38754  |
| N  | -2.17819 | 0.57124  | -0.15913 |
| C  | -1.71915 | 1.32331  | -1.34897 |
| H  | -2.38256 | 2.17955  | -1.53334 |
| H  | -1.72491 | 0.62478  | -2.19459 |
| I  | 1.71807  | -0.32752 | -1.08317 |
| C  | 1.09837  | -2.61214 | 1.93901  |
| O  | 1.08984  | -3.04035 | 0.71905  |
| O  | 0.42989  | -1.67875 | 2.38618  |
| C  | 2.07542  | -3.37443 | 2.82350  |
| H  | 1.83548  | -3.20373 | 3.88141  |
| H  | 2.06422  | -4.44793 | 2.58782  |
| H  | 3.09192  | -3.00032 | 2.61978  |
| C  | -2.12567 | -2.84469 | -1.96388 |
| O  | -1.43817 | -1.79026 | -2.21051 |
| C  | -3.27020 | -3.20713 | -2.87342 |
| H  | -3.71509 | -2.30636 | -3.32012 |
| H  | -2.88136 | -3.83058 | -3.69488 |
| H  | -4.02266 | -3.79223 | -2.32718 |
| Pd | -0.04218 | -2.21524 | -0.69458 |
| O  | -1.82576 | -3.56134 | -0.97605 |
| H  | -0.68936 | 1.65505  | -1.19041 |

**A2-ts**

|   |          |          |          |
|---|----------|----------|----------|
| C | 1.14229  | 2.11484  | 2.06845  |
| C | -0.11562 | 1.58459  | 1.76957  |
| C | -0.89659 | 2.17608  | 0.76811  |
| C | -0.42483 | 3.30410  | 0.07387  |
| C | 0.82352  | 3.83659  | 0.39276  |
| C | 1.60692  | 3.24054  | 1.38854  |
| H | 1.75737  | 1.59577  | 2.80438  |
| H | -0.43727 | 0.67586  | 2.27895  |
| H | -1.03123 | 3.75532  | -0.71601 |
| H | 1.19402  | 4.70938  | -0.14969 |
| H | 2.59650  | 3.64477  | 1.61410  |
| C | -2.21966 | 1.59889  | 0.43028  |
| C | -3.33419 | 1.83299  | 1.24185  |
| C | -4.58772 | 1.33061  | 0.90463  |
| H | -3.18472 | 2.43458  | 2.13880  |
| C | -3.59347 | 0.35427  | -1.04479 |
| C | -4.71662 | 0.58941  | -0.27341 |
| H | -5.45280 | 1.52055  | 1.54362  |
| H | -3.62361 | -0.26017 | -1.94287 |
| H | -5.67582 | 0.18178  | -0.59524 |
| N | -2.37000 | 0.83408  | -0.69657 |
| C | -1.20801 | 0.39719  | -1.49351 |
| H | -1.49033 | 0.39740  | -2.55605 |

|    |          |          |          |
|----|----------|----------|----------|
| H  | -1.34787 | -0.98139 | -1.46036 |
| I  | 2.34688  | 0.42947  | -1.41758 |
| C  | 1.88307  | -1.74132 | 1.97735  |
| O  | 1.69140  | -1.98331 | 0.71012  |
| O  | 1.32033  | -0.88851 | 2.65118  |
| C  | 2.95079  | -2.65756 | 2.56557  |
| H  | 2.96598  | -2.55417 | 3.65847  |
| H  | 2.76501  | -3.70271 | 2.27799  |
| H  | 3.93119  | -2.37219 | 2.15239  |
| C  | -1.99914 | -2.53894 | -0.27472 |
| O  | -2.08205 | -2.07557 | -1.46364 |
| C  | -2.90556 | -3.68506 | 0.10260  |
| H  | -2.41114 | -4.62157 | -0.20316 |
| H  | -3.05598 | -3.71402 | 1.18927  |
| H  | -3.86237 | -3.61746 | -0.43263 |
| Pd | 0.36120  | -0.88855 | -0.29533 |
| O  | -1.19030 | -2.09746 | 0.57635  |
| H  | -0.39294 | 1.11677  | -1.38392 |

**A3**

|   |          |         |          |
|---|----------|---------|----------|
| C | -0.05887 | 1.13230 | -3.40820 |
| C | 0.91678  | 0.96502 | -2.42250 |
| C | 1.15252  | 1.99658 | -1.49924 |
| C | 0.43269  | 3.19816 | -1.59137 |



|   |          |          |          |
|---|----------|----------|----------|
| C | -0.53379 | 3.35983  | -2.58723 |
| C | -0.78842 | 2.32207  | -3.48854 |
| H | -0.25484 | 0.31838  | -4.10972 |
| H | 1.48578  | 0.03827  | -2.33681 |
| H | 0.62399  | 4.00331  | -0.87693 |
| H | -1.09515 | 4.29505  | -2.65150 |
| H | -1.55814 | 2.44084  | -4.25480 |
| C | 2.15612  | 1.82351  | -0.41286 |
| C | 3.50472  | 2.12176  | -0.60806 |
| C | 4.42877  | 1.94959  | 0.41494  |
| H | 3.81189  | 2.45811  | -1.59807 |
| C | 2.63506  | 1.21308  | 1.81841  |
| C | 3.97469  | 1.49886  | 1.65830  |
| H | 5.48895  | 2.14223  | 0.24434  |
| H | 2.23026  | 0.81362  | 2.74815  |
| H | 4.65720  | 1.33562  | 2.49282  |
| N | 1.73795  | 1.37426  | 0.81009  |
| C | 0.39762  | 0.84181  | 0.98033  |
| H | 0.12709  | 0.88389  | 2.04173  |
| I | 0.19872  | -3.66022 | -0.82592 |
| C | 3.33549  | -1.39571 | 0.02273  |
| O | 2.18421  | -0.92812 | -0.40179 |
| O | 4.39054  | -1.00557 | -0.45370 |
| C | 3.29646  | -2.40741 | 1.15821  |

|    |          |          |          |
|----|----------|----------|----------|
| H  | 4.31763  | -2.63315 | 1.49132  |
| H  | 2.70089  | -2.02024 | 2.00194  |
| H  | 2.79748  | -3.32670 | 0.81578  |
| Pd | 0.26422  | -1.15495 | 0.25473  |
| H  | -0.29926 | 1.43475  | 0.38705  |
| C  | -2.56766 | 0.18523  | 0.14647  |
| O  | -2.98734 | 0.54893  | -0.92794 |
| O  | -2.61586 | 0.90334  | 1.28238  |
| C  | -3.27823 | 2.21260  | 1.36312  |
| C  | -4.75596 | 2.06599  | 0.98991  |
| H  | -5.28132 | 3.01248  | 1.19021  |
| H  | -4.87458 | 1.81360  | -0.07109 |
| H  | -5.22412 | 1.27648  | 1.59777  |
| C  | -3.12209 | 2.57871  | 2.83831  |
| H  | -2.05692 | 2.61783  | 3.11336  |
| H  | -3.57090 | 3.56380  | 3.03579  |
| H  | -3.61768 | 1.83189  | 3.47661  |
| C  | -2.55925 | 3.22523  | 0.46886  |
| H  | -3.05014 | 4.20667  | 0.55822  |
| H  | -1.50991 | 3.34088  | 0.77868  |
| H  | -2.58040 | 2.91060  | -0.58122 |
| C  | -1.94676 | -1.16055 | 0.35638  |
| H  | -2.19913 | -1.86690 | -0.43775 |
| C  | -1.42885 | -1.60956 | 1.56187  |

|   |          |          |         |
|---|----------|----------|---------|
| H | -1.42185 | -0.94975 | 2.43248 |
| H | -1.30639 | -2.68038 | 1.73944 |

**A4-ts**

|   |          |          |          |
|---|----------|----------|----------|
| C | -0.08750 | 2.70853  | -2.56844 |
| C | 0.77576  | 1.93627  | -1.78530 |
| C | 1.33976  | 2.49083  | -0.62606 |
| C | 1.03786  | 3.81532  | -0.26378 |
| C | 0.18026  | 4.58067  | -1.05663 |
| C | -0.38290 | 4.02714  | -2.21150 |
| H | -0.53042 | 2.27010  | -3.46572 |
| H | 1.02066  | 0.90424  | -2.03872 |
| H | 1.48434  | 4.24936  | 0.63509  |
| H | -0.04823 | 5.61038  | -0.77163 |
| H | -1.05800 | 4.62427  | -2.82942 |
| C | 2.32753  | 1.72889  | 0.19082  |
| C | 3.67154  | 1.67274  | -0.19658 |
| C | 4.61426  | 1.03839  | 0.59593  |
| H | 3.93828  | 2.09577  | -1.16329 |
| C | 2.87911  | 0.56145  | 2.17706  |
| C | 4.20412  | 0.47445  | 1.81360  |
| H | 5.64941  | 0.95643  | 0.26255  |
| H | 2.49180  | 0.12155  | 3.09623  |
| H | 4.90325  | -0.04733 | 2.46785  |

|    |          |          |          |
|----|----------|----------|----------|
| N  | 1.95963  | 1.19114  | 1.39428  |
| C  | 0.56203  | 1.15963  | 1.83796  |
| H  | 0.57074  | 1.60407  | 2.83641  |
| I  | -0.82049 | -2.79053 | -1.03594 |
| C  | 2.87193  | -1.30950 | -0.85040 |
| O  | 1.78611  | -0.60640 | -0.66405 |
| O  | 3.81417  | -0.87235 | -1.50415 |
| C  | 2.94572  | -2.67832 | -0.18728 |
| H  | 3.96188  | -3.08210 | -0.28531 |
| H  | 2.66068  | -2.61562 | 0.87513  |
| H  | 2.22455  | -3.35911 | -0.66436 |
| Pd | 0.10116  | -0.89996 | 0.52443  |
| H  | -0.06539 | 1.75711  | 1.17406  |
| C  | -2.73825 | -0.52424 | 1.19875  |
| O  | -3.70458 | -1.18064 | 0.89779  |
| O  | -2.61682 | 0.81507  | 1.00932  |
| C  | -3.56907 | 1.58084  | 0.20321  |
| C  | -4.96623 | 1.53253  | 0.82820  |
| H  | -5.63321 | 2.22501  | 0.29101  |
| H  | -5.38462 | 0.52033  | 0.78065  |
| H  | -4.92099 | 1.84766  | 1.88274  |
| C  | -2.99881 | 2.99744  | 0.26223  |
| H  | -1.97743 | 3.02004  | -0.14160 |
| H  | -3.61949 | 3.68533  | -0.33177 |

|   |          |          |          |
|---|----------|----------|----------|
| H | -2.97433 | 3.36018  | 1.30180  |
| C | -3.55060 | 1.04072  | -1.22934 |
| H | -4.18943 | 1.66649  | -1.87187 |
| H | -2.52481 | 1.05963  | -1.62792 |
| H | -3.91724 | 0.00679  | -1.26293 |
| C | -1.49615 | -1.07327 | 1.81551  |
| H | -1.58181 | -2.12766 | 2.09270  |
| C | -0.67768 | -0.20309 | 2.63205  |
| H | -1.18996 | 0.69504  | 2.98536  |
| H | -0.06227 | -0.67960 | 3.40251  |

#### **A5**

|   |          |          |          |
|---|----------|----------|----------|
| C | -4.54576 | -0.50880 | 0.64561  |
| C | -3.23918 | -0.97272 | 0.81428  |
| C | -2.60205 | -1.67725 | -0.22098 |
| C | -3.29609 | -1.91904 | -1.41927 |
| C | -4.60219 | -1.45503 | -1.58161 |
| C | -5.22927 | -0.74818 | -0.54993 |
| H | -5.02614 | 0.05201  | 1.45064  |
| H | -2.68826 | -0.76258 | 1.73272  |
| H | -2.81865 | -2.48569 | -2.22167 |
| H | -5.13408 | -1.65076 | -2.51562 |
| H | -6.25012 | -0.38130 | -0.68092 |
| C | -1.24153 | -2.23043 | 0.00946  |

|    |          |          |          |
|----|----------|----------|----------|
| C  | -1.03075 | -3.11947 | 1.06273  |
| C  | 0.22413  | -3.69062 | 1.27635  |
| H  | -1.87769 | -3.36149 | 1.70427  |
| C  | 1.04140  | -2.43044 | -0.59674 |
| C  | 1.26820  | -3.34296 | 0.42841  |
| H  | 0.37749  | -4.38940 | 2.10151  |
| H  | 1.86780  | -2.14237 | -1.26334 |
| H  | 2.27735  | -3.73909 | 0.54672  |
| N  | -0.19252 | -1.90982 | -0.80994 |
| C  | -0.36986 | -0.90335 | -1.90110 |
| H  | -0.68662 | -1.46289 | -2.79436 |
| I  | 0.17636  | 0.36167  | 2.15013  |
| C  | 4.32920  | -0.91367 | -1.35845 |
| O  | 3.98624  | -0.05352 | -0.46148 |
| O  | 3.58787  | -1.74682 | -1.89624 |
| C  | 5.79807  | -0.82683 | -1.75294 |
| H  | 5.99087  | 0.15301  | -2.21756 |
| H  | 6.43205  | -0.88644 | -0.85529 |
| H  | 6.05433  | -1.62986 | -2.45599 |
| Pd | 2.15622  | 0.14959  | 0.44818  |
| H  | -1.19115 | -0.25095 | -1.59713 |
| C  | 0.53053  | 2.15539  | -0.93019 |
| O  | 0.96354  | 3.19588  | -0.49428 |
| O  | -0.76539 | 1.93844  | -1.24433 |

|   |          |          |          |
|---|----------|----------|----------|
| C | -1.80864 | 2.95143  | -1.05762 |
| C | -1.49083 | 4.19311  | -1.89567 |
| H | -2.34400 | 4.88851  | -1.86003 |
| H | -0.59716 | 4.70451  | -1.51848 |
| H | -1.32141 | 3.90992  | -2.94664 |
| C | -3.05729 | 2.24614  | -1.58791 |
| H | -3.25189 | 1.32566  | -1.02012 |
| H | -3.93584 | 2.90271  | -1.49583 |
| H | -2.93004 | 1.98087  | -2.64898 |
| C | -1.95425 | 3.27793  | 0.42944  |
| H | -2.79902 | 3.97017  | 0.57275  |
| H | -2.14331 | 2.35999  | 1.00434  |
| H | -1.03988 | 3.74298  | 0.81856  |
| C | 1.39598  | 0.96278  | -1.25938 |
| H | 2.33887  | 1.37226  | -1.64705 |
| C | 0.85242  | -0.05567 | -2.26110 |
| H | 0.52029  | 0.51022  | -3.15180 |
| H | 1.68575  | -0.68588 | -2.59947 |

**A6-ts**

|   |          |          |          |
|---|----------|----------|----------|
| C | -4.61587 | -0.79467 | 0.05027  |
| C | -3.27662 | -1.11932 | 0.27347  |
| C | -2.70350 | -2.22269 | -0.38308 |
| C | -3.48805 | -2.99808 | -1.24950 |

|   |          |          |          |
|---|----------|----------|----------|
| C | -4.82895 | -2.66721 | -1.46992 |
| C | -5.39326 | -1.56409 | -0.82315 |
| H | -5.05519 | 0.06265  | 0.56626  |
| H | -2.66585 | -0.52297 | 0.95776  |
| H | -3.04366 | -3.85962 | -1.75457 |
| H | -5.43309 | -3.27442 | -2.14860 |
| H | -6.44117 | -1.30598 | -0.99545 |
| C | -1.28022 | -2.58146 | -0.12364 |
| C | -0.95861 | -3.66088 | 0.68278  |
| C | 0.38747  | -3.93259 | 0.97894  |
| H | -1.76854 | -4.26466 | 1.09291  |
| C | 1.05201  | -1.96949 | -0.33162 |
| C | 1.36135  | -3.07331 | 0.50111  |
| H | 0.64954  | -4.79509 | 1.59779  |
| H | 2.51817  | -1.71558 | -1.27047 |
| H | 2.41120  | -3.23319 | 0.76403  |
| N | -0.27252 | -1.82199 | -0.66699 |
| C | -0.66311 | -0.72130 | -1.59207 |
| H | -1.25994 | -1.16948 | -2.40013 |
| I | -0.13759 | 0.75681  | 2.28407  |
| C | 4.27904  | -0.92256 | -1.16761 |
| O | 3.99723  | -0.24507 | -0.18241 |
| O | 3.42973  | -1.72750 | -1.76642 |
| C | 5.64382  | -0.89344 | -1.80670 |



|    |          |          |          |
|----|----------|----------|----------|
| H  | 5.54792  | -0.55334 | -2.84977 |
| H  | 6.30755  | -0.22183 | -1.24977 |
| H  | 6.06037  | -1.91191 | -1.83478 |
| Pd | 1.69823  | 0.00421  | 0.54446  |
| H  | -1.31057 | -0.02765 | -1.04454 |
| C  | 0.62622  | 2.30351  | -0.90355 |
| O  | 1.27215  | 3.28434  | -0.61499 |
| O  | -0.70408 | 2.27363  | -1.08356 |
| C  | -1.56184 | 3.45739  | -0.94263 |
| C  | -1.19558 | 4.46713  | -2.03329 |
| H  | -1.89954 | 5.31341  | -2.00875 |
| H  | -0.17827 | 4.85056  | -1.88116 |
| H  | -1.25566 | 3.99669  | -3.02748 |
| C  | -2.96013 | 2.88185  | -1.16808 |
| H  | -3.18664 | 2.12012  | -0.40693 |
| H  | -3.71600 | 3.67921  | -1.10473 |
| H  | -3.03027 | 2.40980  | -2.16018 |
| C  | -1.43922 | 4.05647  | 0.45921  |
| H  | -2.16911 | 4.87448  | 0.56562  |
| H  | -1.64755 | 3.29345  | 1.22199  |
| H  | -0.43137 | 4.45221  | 0.63259  |
| C  | 1.25730  | 0.95595  | -1.18349 |
| H  | 2.28862  | 1.15760  | -1.50689 |
| C  | 0.51131  | 0.05570  | -2.16694 |

|           |          |          |          |
|-----------|----------|----------|----------|
| H         | 0.08475  | 0.69580  | -2.95955 |
| H         | 1.22375  | -0.62554 | -2.65131 |
| <b>A7</b> |          |          |          |
| C         | -5.38351 | -2.39993 | 0.06193  |
| C         | -4.02684 | -2.18689 | 0.30858  |
| C         | -3.05344 | -2.92006 | -0.39432 |
| C         | -3.46456 | -3.87602 | -1.33625 |
| C         | -4.82469 | -4.08498 | -1.58339 |
| C         | -5.78571 | -3.34755 | -0.88672 |
| H         | -6.13105 | -1.82817 | 0.61713  |
| H         | -3.71350 | -1.45194 | 1.05447  |
| H         | -2.71174 | -4.44966 | -1.88225 |
| H         | -5.13279 | -4.82638 | -2.32459 |
| H         | -6.84867 | -3.51186 | -1.07933 |
| C         | -1.60643 | -2.74778 | -0.08993 |
| C         | -0.88725 | -3.80207 | 0.44560  |
| C         | 0.45677  | -3.62267 | 0.81056  |
| H         | -1.39739 | -4.75315 | 0.60102  |
| C         | 0.31281  | -1.30038 | 0.11695  |
| C         | 1.03825  | -2.37592 | 0.67421  |
| H         | 1.02964  | -4.45816 | 1.22065  |
| H         | 4.04807  | 0.46193  | 0.98474  |
| H         | 2.07372  | -2.19102 | 0.95559  |

|    |          |          |          |
|----|----------|----------|----------|
| N  | -0.97785 | -1.53312 | -0.28782 |
| C  | -1.65862 | -0.46475 | -1.07337 |
| H  | -2.66537 | -0.81066 | -1.32146 |
| I  | 1.93160  | 0.78592  | 2.45002  |
| C  | 4.59463  | -0.44747 | -0.60510 |
| O  | 3.77375  | -1.33661 | -0.51258 |
| O  | 4.74476  | 0.52890  | 0.28863  |
| C  | 5.54513  | -0.29153 | -1.76824 |
| H  | 6.55387  | -0.03499 | -1.41362 |
| H  | 5.56189  | -1.21305 | -2.36269 |
| H  | 5.19470  | 0.54436  | -2.39550 |
| Pd | 1.14727  | 0.44830  | -0.11998 |
| H  | -1.74564 | 0.42696  | -0.43684 |
| C  | 0.49030  | 1.97392  | -1.76443 |
| O  | 1.54535  | 2.46154  | -1.31072 |
| O  | -0.66857 | 2.63355  | -1.83932 |
| C  | -0.88035 | 3.93859  | -1.18523 |
| C  | -0.00362 | 4.99941  | -1.85323 |
| H  | -0.25183 | 5.99174  | -1.44556 |
| H  | 1.05938  | 4.79678  | -1.67379 |
| H  | -0.18594 | 5.01625  | -2.93908 |
| C  | -2.36147 | 4.20503  | -1.45019 |
| H  | -2.98229 | 3.41649  | -0.99790 |
| H  | -2.65607 | 5.17274  | -1.01730 |

|   |          |          |          |
|---|----------|----------|----------|
| H | -2.56226 | 4.22771  | -2.53203 |
| C | -0.60560 | 3.81669  | 0.31582  |
| H | -0.90769 | 4.74884  | 0.81753  |
| H | -1.18715 | 2.98867  | 0.74956  |
| H | 0.45548  | 3.63342  | 0.52343  |
| C | 0.44192  | 0.54827  | -2.09228 |
| H | 1.29974  | 0.21214  | -2.68550 |
| C | -0.88375 | -0.13003 | -2.35749 |
| H | -1.54022 | 0.51911  | -2.96155 |
| H | -0.72906 | -1.06055 | -2.92603 |

**A8-ts**

|   |          |          |          |
|---|----------|----------|----------|
| C | -5.17877 | 0.10783  | -2.22144 |
| C | -4.10384 | 0.19661  | -1.33662 |
| C | -4.13179 | -0.50104 | -0.11436 |
| C | -5.25618 | -1.27969 | 0.20546  |
| C | -6.32871 | -1.36944 | -0.68564 |
| C | -6.29189 | -0.67758 | -1.89983 |
| H | -5.15077 | 0.66060  | -3.16350 |
| H | -3.24277 | 0.82394  | -1.58099 |
| H | -5.28011 | -1.82564 | 1.15154  |
| H | -7.19483 | -1.98507 | -0.43101 |
| H | -7.13154 | -0.74743 | -2.59566 |
| C | -3.01853 | -0.35640 | 0.85556  |

|    |          |          |          |
|----|----------|----------|----------|
| C  | -3.24532 | 0.04961  | 2.15659  |
| C  | -2.15207 | 0.25138  | 3.02970  |
| H  | -4.26883 | 0.24251  | 2.47665  |
| C  | -0.61814 | -0.26049 | 1.21373  |
| C  | -0.86327 | 0.09797  | 2.57320  |
| H  | -2.33332 | 0.55984  | 4.06237  |
| H  | -0.00459 | 0.26799  | 3.22336  |
| N  | -1.72411 | -0.56671 | 0.43725  |
| C  | -1.37034 | -1.27204 | -0.81083 |
| H  | -2.26736 | -1.72623 | -1.24455 |
| I  | 1.18380  | 2.91275  | -0.40661 |
| Pd | 0.98551  | 0.44326  | 0.38295  |
| H  | -0.96022 | -0.54298 | -1.52548 |
| C  | 2.02735  | -1.86915 | 0.70810  |
| O  | 2.71562  | -1.90020 | 1.70845  |
| O  | 2.49292  | -1.96495 | -0.55555 |
| C  | 3.92574  | -1.88700 | -0.87322 |
| C  | 4.64690  | -3.11028 | -0.30157 |
| H  | 5.69546  | -3.11098 | -0.63781 |
| H  | 4.62412  | -3.10049 | 0.79519  |
| H  | 4.16950  | -4.03577 | -0.65993 |
| C  | 3.93018  | -1.90861 | -2.40122 |
| H  | 3.37168  | -1.04719 | -2.79719 |
| H  | 4.96283  | -1.86204 | -2.77848 |

|   |          |          |          |
|---|----------|----------|----------|
| H | 3.46107  | -2.83147 | -2.77541 |
| C | 4.50697  | -0.57162 | -0.34755 |
| H | 5.54857  | -0.47043 | -0.68961 |
| H | 3.93402  | 0.28607  | -0.73427 |
| H | 4.49228  | -0.54004 | 0.74885  |
| C | 0.51456  | -1.79843 | 0.75772  |
| H | 0.24429  | -2.25826 | 1.71342  |
| C | -0.30648 | -2.31800 | -0.42138 |
| H | 0.34189  | -2.51577 | -1.28331 |
| H | -0.80396 | -3.26075 | -0.14211 |

**A9**

|   |          |          |          |
|---|----------|----------|----------|
| C | -5.20623 | 0.24757  | -2.12170 |
| C | -4.03271 | 0.17313  | -1.36944 |
| C | -4.05597 | -0.39341 | -0.08187 |
| C | -5.26801 | -0.86732 | 0.44298  |
| C | -6.43943 | -0.79445 | -0.31653 |
| C | -6.40976 | -0.23968 | -1.59930 |
| H | -5.18175 | 0.69800  | -3.11692 |
| H | -3.09835 | 0.57954  | -1.76676 |
| H | -5.28783 | -1.29692 | 1.44757  |
| H | -7.37832 | -1.17083 | 0.09694  |
| H | -7.32658 | -0.18003 | -2.19108 |
| C | -2.81669 | -0.41082 | 0.73683  |

|    |          |          |          |
|----|----------|----------|----------|
| C  | -2.68658 | 0.37498  | 1.87944  |
| C  | -1.47437 | 0.39522  | 2.60311  |
| H  | -3.52893 | 0.99568  | 2.18261  |
| C  | -0.49262 | -1.06604 | 0.94571  |
| C  | -0.38662 | -0.40280 | 2.21679  |
| H  | -1.40493 | 0.99008  | 3.51707  |
| H  | 0.45456  | -0.62623 | 2.87616  |
| N  | -1.74651 | -1.12923 | 0.31146  |
| C  | -1.71948 | -2.05812 | -0.84072 |
| H  | -2.40581 | -2.89470 | -0.63036 |
| I  | 0.83226  | 1.36409  | -1.98176 |
| Pd | 0.34282  | 0.79519  | 0.54720  |
| H  | -2.06493 | -1.55239 | -1.74984 |
| C  | 1.79880  | -2.08610 | 0.66686  |
| O  | 2.28209  | -1.97446 | 1.77253  |
| O  | 2.44441  | -2.05617 | -0.48647 |
| C  | 3.87900  | -1.71863 | -0.59999 |
| C  | 4.70119  | -2.83212 | 0.04976  |
| H  | 5.77279  | -2.64191 | -0.11623 |
| H  | 4.51418  | -2.87713 | 1.13074  |
| H  | 4.45106  | -3.80666 | -0.39819 |
| C  | 4.08390  | -1.66820 | -2.11211 |
| H  | 3.43536  | -0.89595 | -2.55231 |
| H  | 5.13291  | -1.42839 | -2.34249 |

|   |          |          |          |
|---|----------|----------|----------|
| H | 3.83667  | -2.63930 | -2.56783 |
| C | 4.13989  | -0.34953 | 0.02958  |
| H | 5.17413  | -0.04459 | -0.19288 |
| H | 3.45363  | 0.39630  | -0.39818 |
| H | 4.00596  | -0.37700 | 1.11813  |
| C | 0.29694  | -2.27865 | 0.47762  |
| H | 0.01953  | -3.12278 | 1.13663  |
| C | -0.24814 | -2.48579 | -0.94005 |
| H | 0.28983  | -1.81719 | -1.62534 |
| H | -0.13784 | -3.51913 | -1.29439 |

**A10**

|   |          |          |          |
|---|----------|----------|----------|
| C | -5.38822 | -2.77095 | 0.14678  |
| C | -4.18427 | -2.23391 | -0.31168 |
| C | -3.85476 | -0.89027 | -0.05204 |
| C | -4.76519 | -0.09653 | 0.66705  |
| C | -5.97238 | -0.63483 | 1.12023  |
| C | -6.28566 | -1.97318 | 0.86535  |
| H | -5.63295 | -3.81420 | -0.06806 |
| H | -3.50091 | -2.85300 | -0.89888 |
| H | -4.51094 | 0.94440  | 0.88048  |
| H | -6.66767 | -0.00655 | 1.68244  |
| H | -7.22842 | -2.39437 | 1.22302  |
| C | -2.59972 | -0.29342 | -0.56654 |



|    |          |          |          |
|----|----------|----------|----------|
| C  | -2.58226 | 0.83741  | -1.35066 |
| C  | -1.36231 | 1.36058  | -1.90952 |
| H  | -3.53540 | 1.30787  | -1.59545 |
| C  | -0.19862 | -0.39661 | -0.71276 |
| C  | -0.14673 | 0.63807  | -1.68014 |
| H  | -1.43495 | 2.05988  | -2.74721 |
| H  | 0.76165  | 0.74103  | -2.27545 |
| N  | -1.38149 | -0.88928 | -0.25801 |
| C  | -1.16238 | -1.82902 | 0.86817  |
| H  | -1.28762 | -1.26530 | 1.80879  |
| Pd | -0.24160 | 2.18267  | -0.28256 |
| H  | -1.89705 | -2.64060 | 0.85200  |
| C  | 2.24477  | -1.21798 | -0.70144 |
| O  | 2.52754  | -0.71007 | -1.76277 |
| O  | 3.07060  | -1.92776 | 0.06990  |
| C  | 4.53496  | -1.83573 | -0.06109 |
| C  | 4.94422  | -0.36178 | 0.02299  |
| H  | 6.03297  | -0.28952 | 0.17018  |
| H  | 4.67789  | 0.17750  | -0.89516 |
| H  | 4.42704  | 0.12308  | 0.86572  |
| C  | 5.02703  | -2.60942 | 1.16062  |
| H  | 4.64907  | -3.64314 | 1.13937  |
| H  | 6.12702  | -2.63788 | 1.17431  |
| H  | 4.67400  | -2.12717 | 2.08421  |

|   |         |          |          |
|---|---------|----------|----------|
| C | 4.98491 | -2.50430 | -1.36080 |
| H | 6.08507 | -2.50963 | -1.41126 |
| H | 4.63321 | -3.54738 | -1.39817 |
| H | 4.59106 | -1.96525 | -2.23154 |
| C | 0.93004 | -1.04953 | 0.02079  |
| C | 0.28355 | -2.28511 | 0.66489  |
| H | 0.32032 | -3.14738 | -0.02087 |
| H | 0.77200 | -2.57138 | 1.60398  |
| C | 1.80061 | 2.26043  | 1.90498  |
| O | 0.86248 | 2.91913  | 1.32947  |
| C | 2.56613 | 3.04463  | 2.96747  |
| H | 3.27886 | 3.71789  | 2.46299  |
| H | 1.88066 | 3.67294  | 3.55457  |
| H | 3.12645 | 2.36357  | 3.62213  |
| O | 2.13870 | 1.09190  | 1.65184  |
| H | 1.22694 | -0.30989 | 0.81117  |

**A11-ts**

|   |          |          |          |
|---|----------|----------|----------|
| C | -5.26520 | -2.77725 | 0.40140  |
| C | -4.08604 | -2.25001 | -0.12702 |
| C | -3.81041 | -0.87281 | -0.03149 |
| C | -4.75052 | -0.03800 | 0.59718  |
| C | -5.93283 | -0.56699 | 1.12154  |
| C | -6.19221 | -1.93752 | 1.02919  |

|    |          |          |          |
|----|----------|----------|----------|
| H  | -5.46709 | -3.84782 | 0.31377  |
| H  | -3.37816 | -2.90523 | -0.64104 |
| H  | -4.53851 | 1.03014  | 0.68468  |
| H  | -6.65085 | 0.09480  | 1.61238  |
| H  | -7.11498 | -2.35145 | 1.44319  |
| C  | -2.58078 | -0.29422 | -0.62282 |
| C  | -2.61146 | 0.74498  | -1.52021 |
| C  | -1.40769 | 1.24207  | -2.14430 |
| H  | -3.58050 | 1.15748  | -1.80314 |
| C  | -0.16869 | -0.38568 | -0.80788 |
| C  | -0.17213 | 0.58283  | -1.86160 |
| H  | -1.50777 | 1.84872  | -3.04885 |
| H  | 0.72712  | 0.66309  | -2.47453 |
| N  | -1.34552 | -0.83798 | -0.27981 |
| C  | -1.07689 | -1.61383 | 0.95681  |
| H  | -1.20978 | -0.92888 | 1.81272  |
| Pd | -0.28342 | 2.25134  | -0.60906 |
| H  | -1.78206 | -2.44410 | 1.06779  |
| C  | 2.28715  | -1.00264 | -0.68499 |
| O  | 2.67526  | -0.32473 | -1.62063 |
| O  | 3.06620  | -1.85529 | 0.01496  |
| C  | 4.52452  | -1.82970 | -0.08022 |
| C  | 5.02892  | -0.42399 | 0.26628  |
| H  | 6.12206  | -0.44023 | 0.39750  |

|   |         |          |          |
|---|---------|----------|----------|
| H | 4.77617 | 0.29258  | -0.52549 |
| H | 4.56111 | -0.08427 | 1.20333  |
| C | 4.95209 | -2.83594 | 0.98881  |
| H | 4.52684 | -3.82790 | 0.77260  |
| H | 6.04904 | -2.92206 | 1.01733  |
| H | 4.59643 | -2.51599 | 1.97985  |
| C | 4.97750 | -2.28536 | -1.47012 |
| H | 6.07599 | -2.36326 | -1.49623 |
| H | 4.55544 | -3.27632 | -1.69973 |
| H | 4.64860 | -1.57467 | -2.23800 |
| C | 0.95220 | -0.93105 | -0.08052 |
| C | 0.38677 | -2.04250 | 0.80059  |
| H | 0.45961 | -3.02729 | 0.30626  |
| H | 0.89717 | -2.11795 | 1.77005  |
| C | 1.57756 | 2.07622  | 1.83286  |
| O | 0.90763 | 2.81323  | 1.08042  |
| C | 2.33644 | 2.71433  | 2.98001  |
| H | 3.40478 | 2.75362  | 2.71131  |
| H | 1.97571 | 3.73368  | 3.16622  |
| H | 2.24772 | 2.09430  | 3.88351  |
| O | 1.72292 | 0.80670  | 1.73456  |
| H | 1.27580 | 0.10648  | 0.82437  |

**A12**

|    |          |          |          |
|----|----------|----------|----------|
| C  | -5.59133 | -2.90971 | 0.02110  |
| C  | -4.38324 | -2.35814 | -0.40791 |
| C  | -3.98840 | -1.07570 | 0.01770  |
| C  | -4.84048 | -0.35862 | 0.87541  |
| C  | -6.05181 | -0.91051 | 1.30104  |
| C  | -6.42951 | -2.18850 | 0.87916  |
| H  | -5.88603 | -3.90390 | -0.32465 |
| H  | -3.74628 | -2.91323 | -1.10105 |
| H  | -4.53705 | 0.63409  | 1.21579  |
| H  | -6.70021 | -0.34094 | 1.97178  |
| H  | -7.37507 | -2.62170 | 1.21483  |
| C  | -2.73045 | -0.45504 | -0.46624 |
| C  | -2.71856 | 0.76241  | -1.09481 |
| C  | -1.49586 | 1.30601  | -1.65103 |
| H  | -3.66457 | 1.28293  | -1.24522 |
| C  | -0.31706 | -0.64654 | -0.73120 |
| C  | -0.28962 | 0.56214  | -1.52450 |
| H  | -1.58980 | 2.05697  | -2.44212 |
| H  | 0.57363  | 0.70410  | -2.17731 |
| N  | -1.53670 | -1.14839 | -0.31401 |
| C  | -1.31018 | -2.25856 | 0.64019  |
| H  | -1.45168 | -1.86471 | 1.66278  |
| Pd | -0.20386 | 2.13540  | -0.15617 |
| H  | -2.03277 | -3.06813 | 0.49028  |

|   |         |          |          |
|---|---------|----------|----------|
| C | 2.10006 | -1.07799 | -0.33572 |
| O | 2.53947 | 0.02125  | -0.72778 |
| O | 2.90744 | -2.06302 | 0.12717  |
| C | 4.35365 | -1.93727 | 0.25006  |
| C | 4.70358 | -0.87858 | 1.30112  |
| H | 5.78645 | -0.89731 | 1.50194  |
| H | 4.42976 | 0.12858  | 0.96758  |
| H | 4.17547 | -1.09513 | 2.24316  |
| C | 4.77102 | -3.32801 | 0.73426  |
| H | 4.47558 | -4.09256 | 0.00001  |
| H | 5.86169 | -3.37529 | 0.87443  |
| H | 4.28183 | -3.56333 | 1.69167  |
| C | 4.99061 | -1.63034 | -1.10986 |
| H | 6.08776 | -1.67202 | -1.02195 |
| H | 4.67540 | -2.38024 | -1.85217 |
| H | 4.69484 | -0.63714 | -1.46756 |
| C | 0.73028 | -1.45037 | -0.28778 |
| C | 0.15099 | -2.67722 | 0.38243  |
| H | 0.19752 | -3.56514 | -0.27553 |
| H | 0.67362 | -2.94251 | 1.31257  |
| C | 2.43781 | 2.98470  | 1.23649  |
| O | 1.20700 | 3.00214  | 1.23090  |
| C | 3.23174 | 3.93973  | 2.08894  |
| H | 3.94429 | 4.49030  | 1.45605  |

|   |         |         |         |
|---|---------|---------|---------|
| H | 2.56108 | 4.63568 | 2.60582 |
| H | 3.82352 | 3.36834 | 2.82107 |
| O | 3.18799 | 2.17263 | 0.53947 |
| H | 2.72067 | 1.43506 | 0.02318 |

**B2-ts**

|   |         |          |          |
|---|---------|----------|----------|
| C | 5.02945 | -1.10728 | -1.40532 |
| C | 3.83160 | -0.76114 | -0.77825 |
| C | 3.80006 | 0.32289  | 0.11674  |
| C | 4.97616 | 1.04090  | 0.38655  |
| C | 6.16966 | 0.69319  | -0.25138 |
| C | 6.19675 | -0.37921 | -1.14819 |
| H | 5.05197 | -1.95558 | -2.09342 |
| H | 2.92032 | -1.33952 | -0.95410 |
| H | 4.95061 | 1.87922  | 1.08737  |
| H | 7.08012 | 1.26122  | -0.04616 |
| H | 7.13150 | -0.65259 | -1.64383 |
| C | 2.53997 | 0.66334  | 0.82448  |
| C | 2.44319 | 0.52758  | 2.21236  |
| C | 1.24087 | 0.78559  | 2.86781  |
| H | 3.32588 | 0.18927  | 2.75582  |
| C | 0.22699 | 1.26136  | 0.72109  |
| C | 0.12952 | 1.14873  | 2.11131  |
| H | 1.16722 | 0.67268  | 3.95175  |

|    |          |          |          |
|----|----------|----------|----------|
| H  | -0.51490 | 2.10717  | 0.11232  |
| H  | -0.84249 | 1.32558  | 2.57517  |
| N  | 1.45058  | 1.08711  | 0.12829  |
| C  | 1.51069  | 1.27612  | -1.33475 |
| H  | 2.49508  | 1.66357  | -1.61898 |
| H  | 0.72379  | 1.98587  | -1.61472 |
| I  | -0.06911 | -2.04301 | -0.02923 |
| C  | -3.89323 | -1.30030 | 0.18409  |
| O  | -3.06604 | -0.98688 | -0.78544 |
| O  | -3.77671 | -0.97994 | 1.35444  |
| C  | -5.04991 | -2.15038 | -0.32907 |
| H  | -5.76001 | -2.33193 | 0.48793  |
| H  | -5.55069 | -1.64453 | -1.16801 |
| H  | -4.65669 | -3.10683 | -0.70673 |
| C  | -2.31053 | 2.98333  | -0.57838 |
| O  | -2.80575 | 1.82827  | -0.50358 |
| C  | -3.22986 | 4.13211  | -0.93055 |
| H  | -4.24181 | 3.77079  | -1.14818 |
| H  | -3.25295 | 4.83950  | -0.08718 |
| H  | -2.81775 | 4.67069  | -1.79707 |
| Pd | -1.53948 | 0.15820  | -0.19995 |
| O  | -1.08618 | 3.25432  | -0.36894 |
| H  | 1.32484  | 0.31094  | -1.82582 |



**B3**

|   |          |          |          |
|---|----------|----------|----------|
| C | 5.59281  | -0.96972 | -0.62877 |
| C | 4.29139  | -0.69949 | -0.20458 |
| C | 3.84298  | 0.62998  | -0.10300 |
| C | 4.72015  | 1.67948  | -0.42075 |
| C | 6.02079  | 1.40365  | -0.85114 |
| C | 6.45832  | 0.08022  | -0.95676 |
| H | 5.93486  | -2.00504 | -0.69828 |
| H | 3.62063  | -1.51919 | 0.06434  |
| H | 4.37480  | 2.71306  | -0.33997 |
| H | 6.69360  | 2.22626  | -1.10500 |
| H | 7.47605  | -0.13465 | -1.29151 |
| C | 2.47941  | 0.92491  | 0.40835  |
| C | 2.31047  | 1.65490  | 1.57466  |
| C | 1.02531  | 1.83827  | 2.10242  |
| H | 3.19563  | 2.03975  | 2.08139  |
| C | 0.10099  | 0.53797  | 0.25934  |
| C | -0.05558 | 1.25429  | 1.46410  |
| H | 0.88650  | 2.40845  | 3.02431  |
| H | -1.40583 | 2.08932  | -2.03447 |
| H | -1.05918 | 1.33472  | 1.88568  |
| N | 1.37095  | 0.43926  | -0.24849 |
| C | 1.53430  | -0.22789 | -1.55722 |
| H | 2.41254  | 0.17321  | -2.07396 |

|    |          |          |          |
|----|----------|----------|----------|
| H  | 0.62805  | -0.05054 | -2.14684 |
| I  | -0.70479 | -2.55552 | 0.35913  |
| C  | -4.28616 | -0.86953 | -0.72148 |
| O  | -3.20429 | -1.05054 | -1.41114 |
| O  | -4.36150 | -0.20279 | 0.31364  |
| C  | -5.50449 | -1.58276 | -1.28903 |
| H  | -6.41688 | -1.24178 | -0.78235 |
| H  | -5.57766 | -1.41417 | -2.37396 |
| H  | -5.38345 | -2.66713 | -1.13551 |
| C  | -2.23915 | 2.89780  | -0.52572 |
| O  | -1.42156 | 3.77689  | -0.53404 |
| C  | -3.44384 | 2.76086  | 0.34585  |
| H  | -3.33709 | 3.41792  | 1.21725  |
| H  | -4.32207 | 3.08044  | -0.24026 |
| H  | -3.63307 | 1.70766  | 0.61557  |
| Pd | -1.51798 | -0.24876 | -0.58204 |
| O  | -2.12985 | 1.84860  | -1.42979 |
| H  | 1.63071  | -1.31226 | -1.41308 |

## 11. References

- [1]. (a) Yin, C.; Zhong, K.; Li, W.; Yang, X.; Sun, R.; Zhang, C.; Zheng, X.; Yuan, M.; Li, R.; Lan, Y. *Adv. Synth. Catal.* **2018**, *360*, 3990. (b) Xu, K.; Li, W.; Sun, R.;

- Luo, L.; Chen, X.; Zhang, C.; Zheng, X.; Yuan, M.; Fu, H.; Li, R.; Chen, H. *Org. Lett.* **2020**, *22*, 6107.
- [2]. Xia, J. B.; You, S. L. *Org. Lett.* **2009**, *11*, 1187.
- [3]. Frisch, M. J.; Trucks, G. W.; Schlegel, H. B.; Scuseria, G. E.; Robb, M. A.; Cheeseman, J. R.; Scalmani, G.; Barone, V.; Mennucci, B.; Petersson, G. A.; Nakatsuji, H.; Caricato, M.; Li, X.; Hratchian, H. P.; Izmaylov, A. F.; Bloino, J.; Zheng, G.; Sonnenberg, J. L.; Hada, M.; Ehara, M.; Toyota, K.; Fukuda, R.; Hasegawa, J.; Ishida, M.; Nakajima, T.; Honda, Y.; Kitao, O.; Nakai, H.; Vreven, T.; Montgomery, J. A.; Peralta, J. E.; Ogliaro, F.; Bearpark, M.; Heyd, J. J.; Brothers, E.; Kudin, K. N.; Staroverov, V. N.; Kobayashi, R.; Normand, J.; Raghavachari, K.; Rendell, A.; Burant, J. C.; Iyengar, S. S.; Tomasi, J.; Cossi, M.; Rega, N.; Millam, J. M.; Klene, M.; Knox, J. E.; Cross, J. B.; Bakken, V.; Adamo, C.; Jaramillo, J.; Gomperts, R.; Stratmann, R. E.; Yazyev, O.; Austin, A. J.; Cammi, R.; Pomelli, C.; Ochterski, J. W.; Martin, R. L.; Morokuma, K.; Zakrzewski, V. G.; Voth, G. A.; Salvador, P.; Dannenberg, J. J.; Dapprich, S.; Daniels, A. D.; Farkas; Foresman, J. B.; Ortiz, J. V.; Cioslowski, J.; Fox, D. J. Gaussian 09 Revision D.01. **2009**.
- [4]. Lee, C.; Yang, W.; Parr, R. G. *Phys. Rev. B* **1988**, *37*, 785.
- [5]. Becke, A. D. *J. Chem. Phys.* **1993**, *98*, 1372.
- [6]. Weigend, F.; Ahlrichs, R. *Phys. Chem. Chem. Phys.* **2005**, *7*, 3297.
- [7]. Grimme, S.; Antony, J.; Ehrlich, S.; Krieg, H. *J. Chem. Phys.* **2010**, *132*, 154104.

# 12. $^1\text{H}$ and $^{13}\text{C}$ NMR spectra

400 MHz  $^1\text{H}$  NMR of **2f** in  $\text{CDCl}_3$

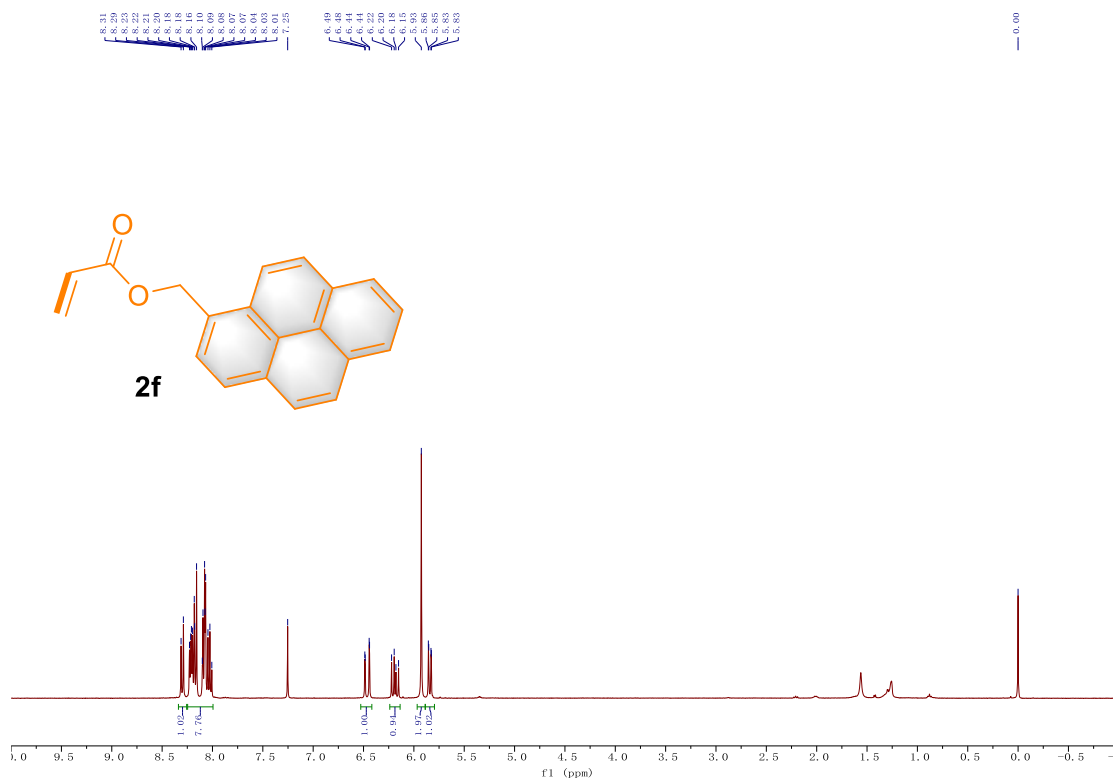

101 MHz  $^{13}\text{C}$  NMR of **2f** in  $\text{CDCl}_3$

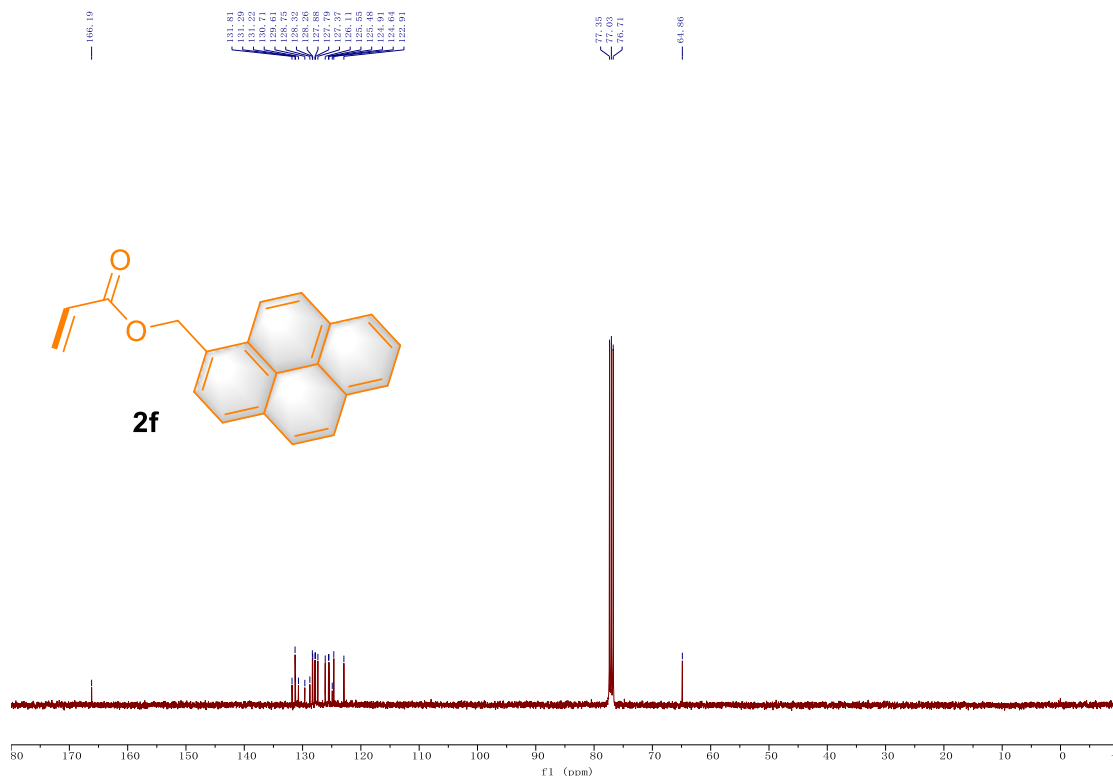

### 400 MHz $^1\text{H}$ NMR of **21** in $\text{CDCl}_3$

Jan04-2022 DMJ-579.1.fid

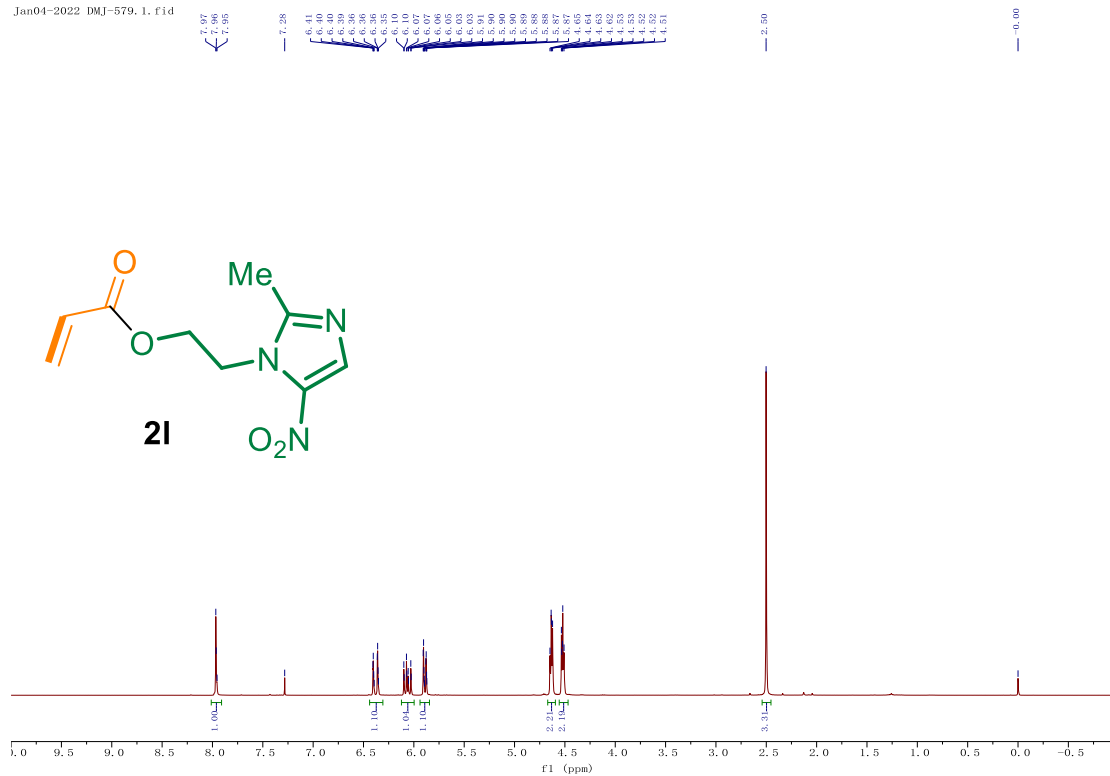

### 101 MHz $^{13}\text{C}$ NMR of **21** in $\text{CDCl}_3$

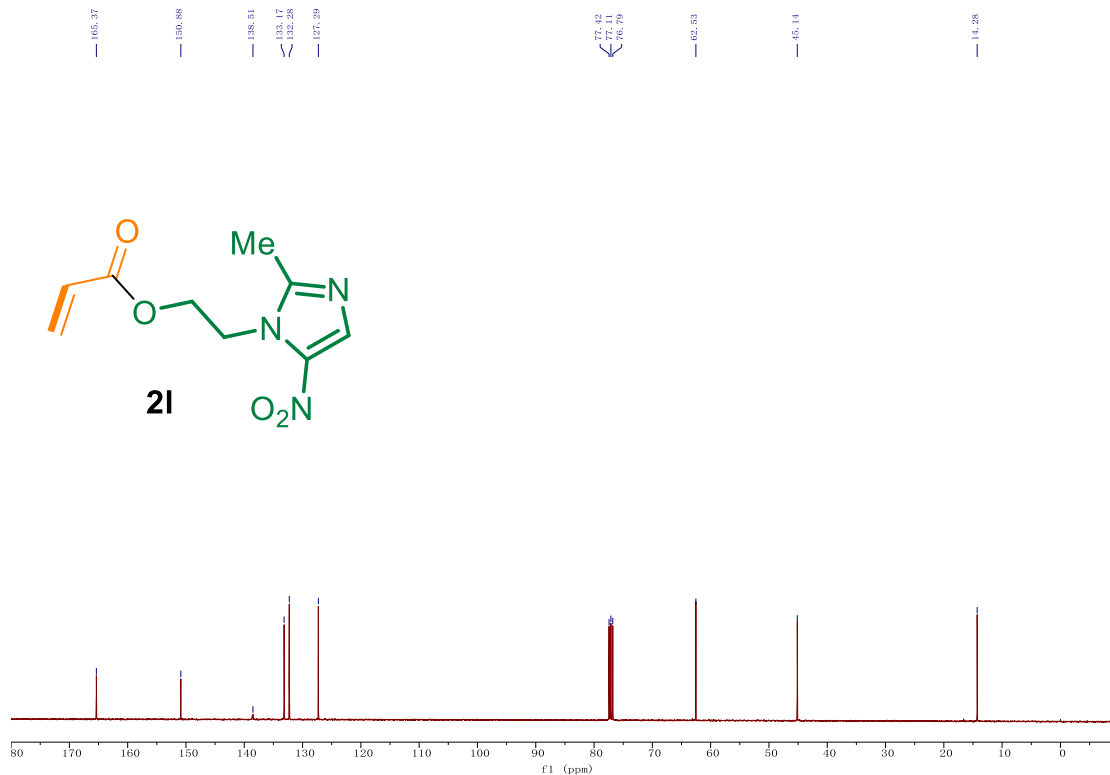

### 400 MHz $^1\text{H}$ NMR of **2m** in $\text{CDCl}_3$

Jan04-2022 DMJ-597.1.fid

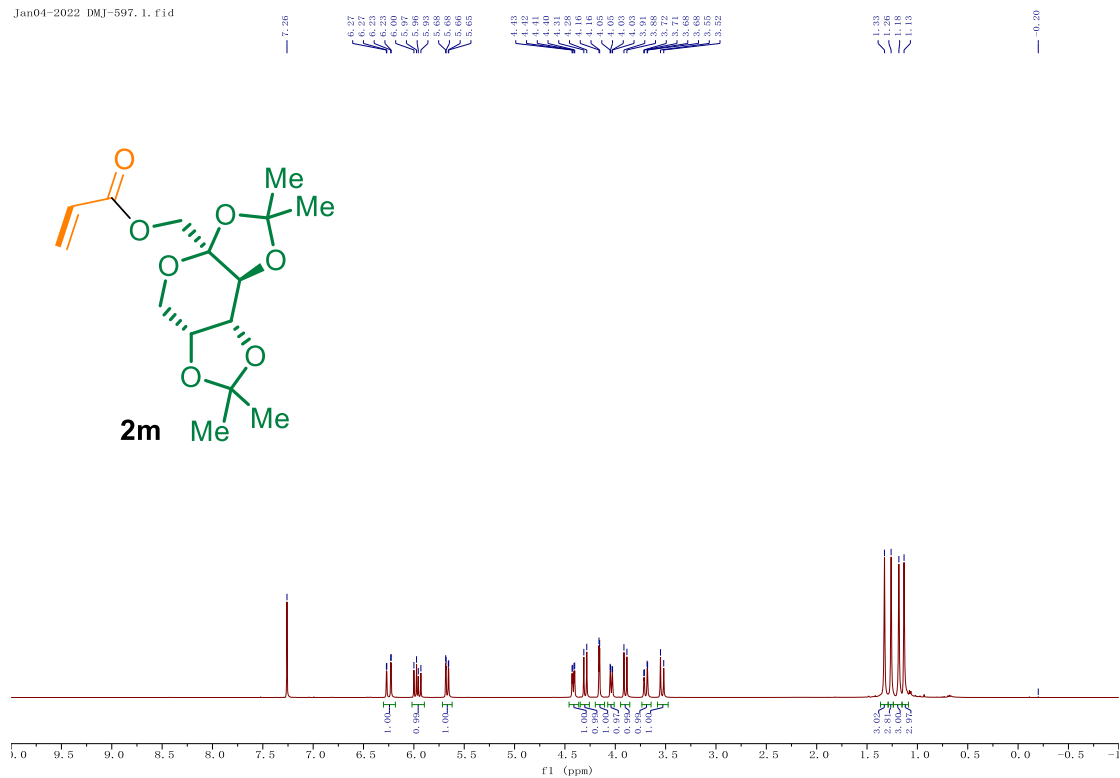

### 101 MHz $^{13}\text{C}$ NMR of **2m** in $\text{CDCl}_3$

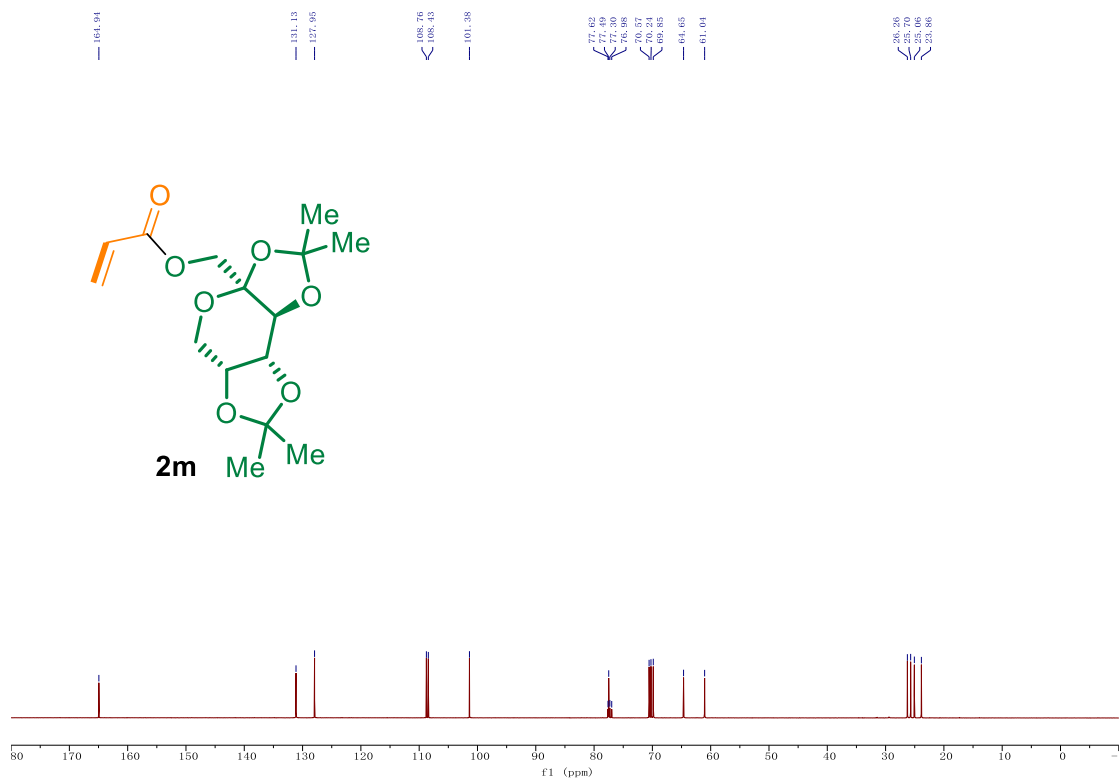

### 400 MHz <sup>1</sup>H NMR of 2n in CDCl<sub>3</sub>

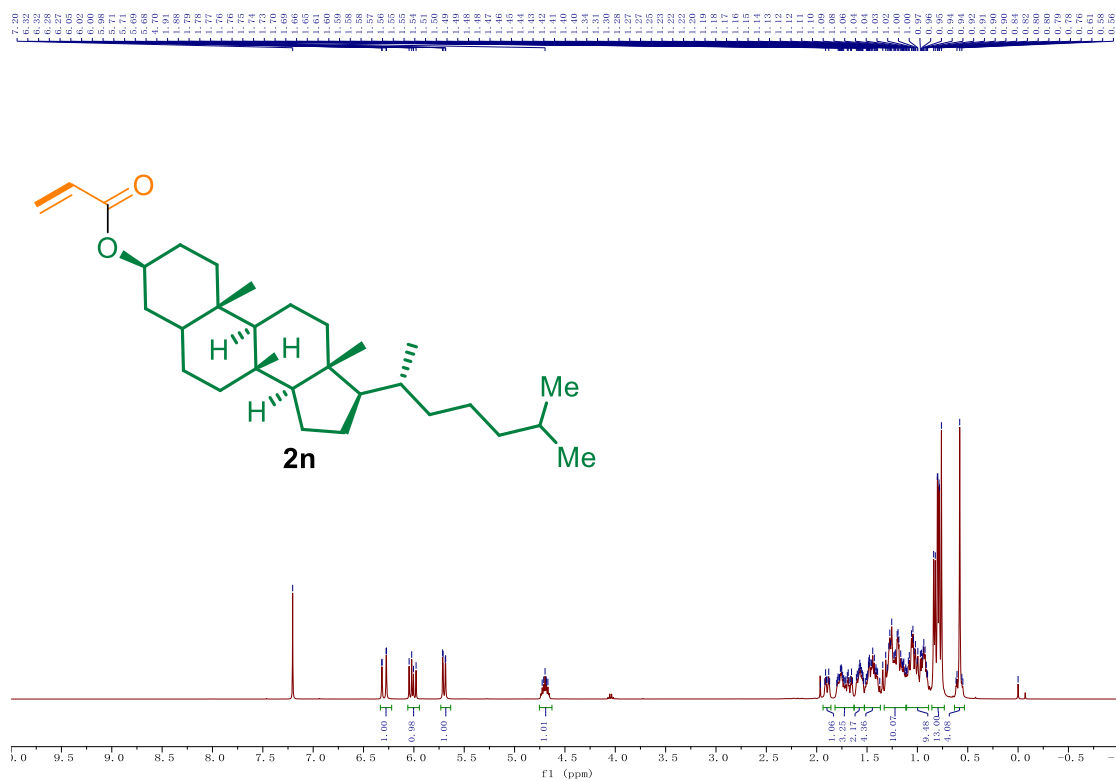

### 101 MHz <sup>13</sup>C NMR of 2n in CDCl<sub>3</sub>

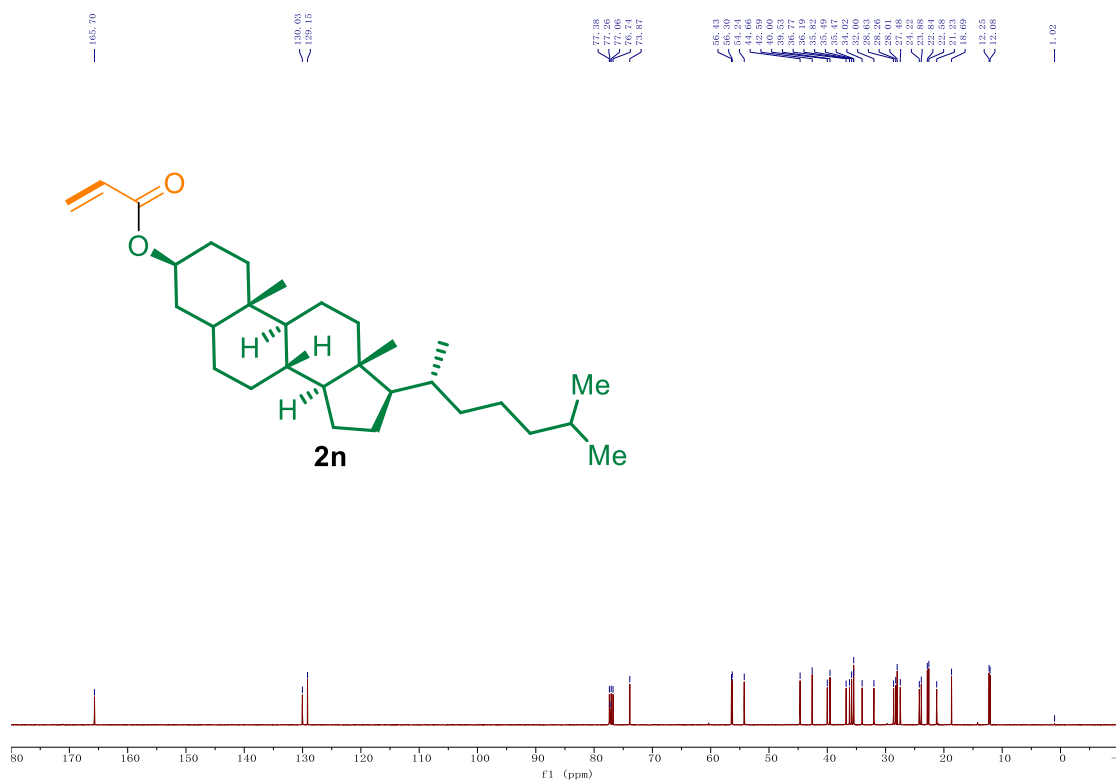

400 MHz  $^1\text{H}$  NMR of **2o** in  $\text{CDCl}_3$

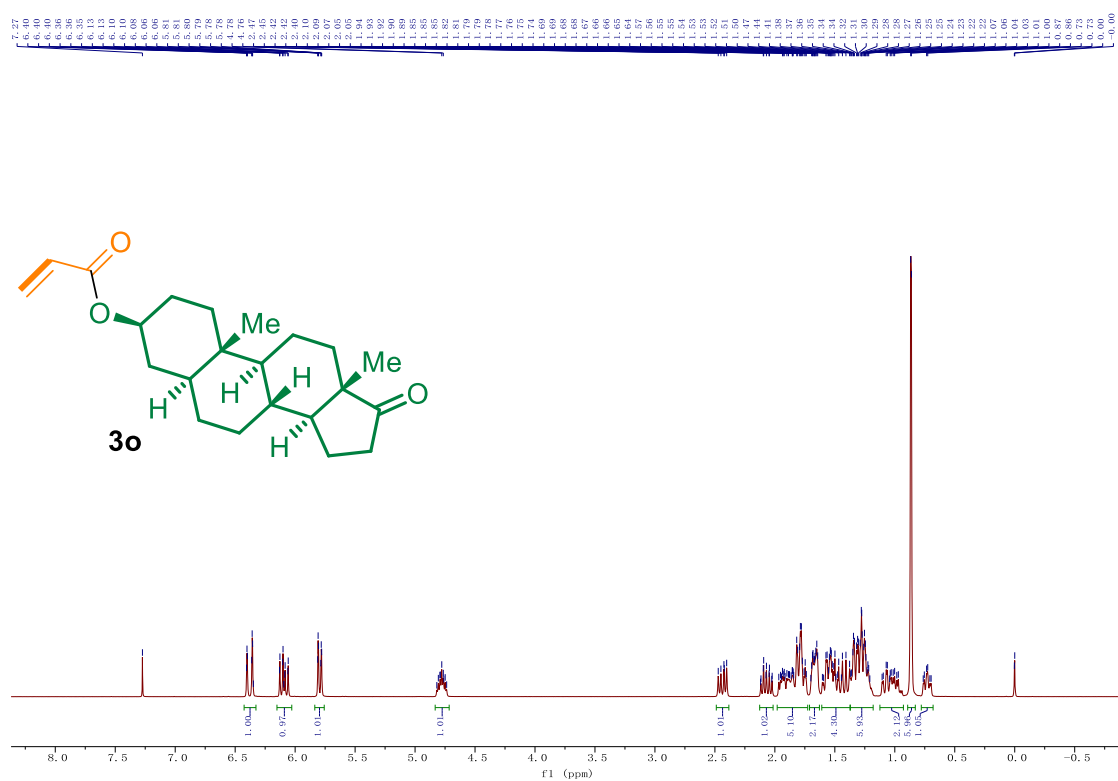

101 MHz  $^{13}\text{C}$  NMR of **2o** in  $\text{CDCl}_3$

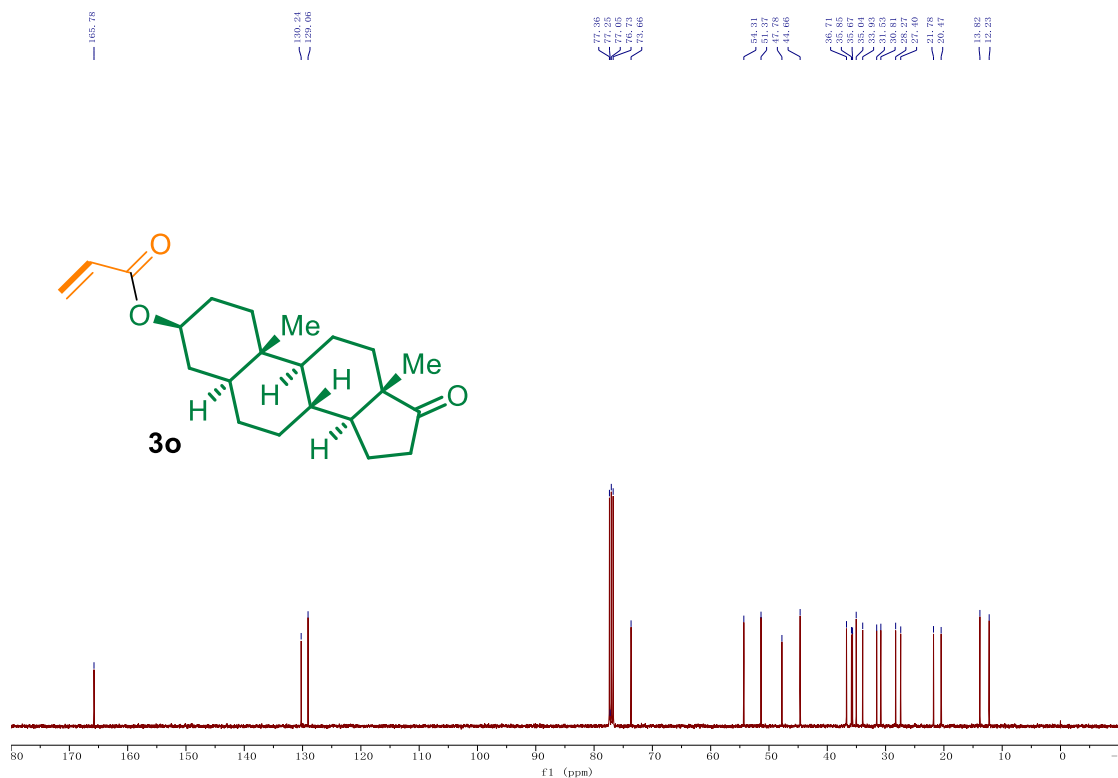



### 600 MHz $^1\text{H}$ NMR of **3a** in $\text{CDCl}_3$

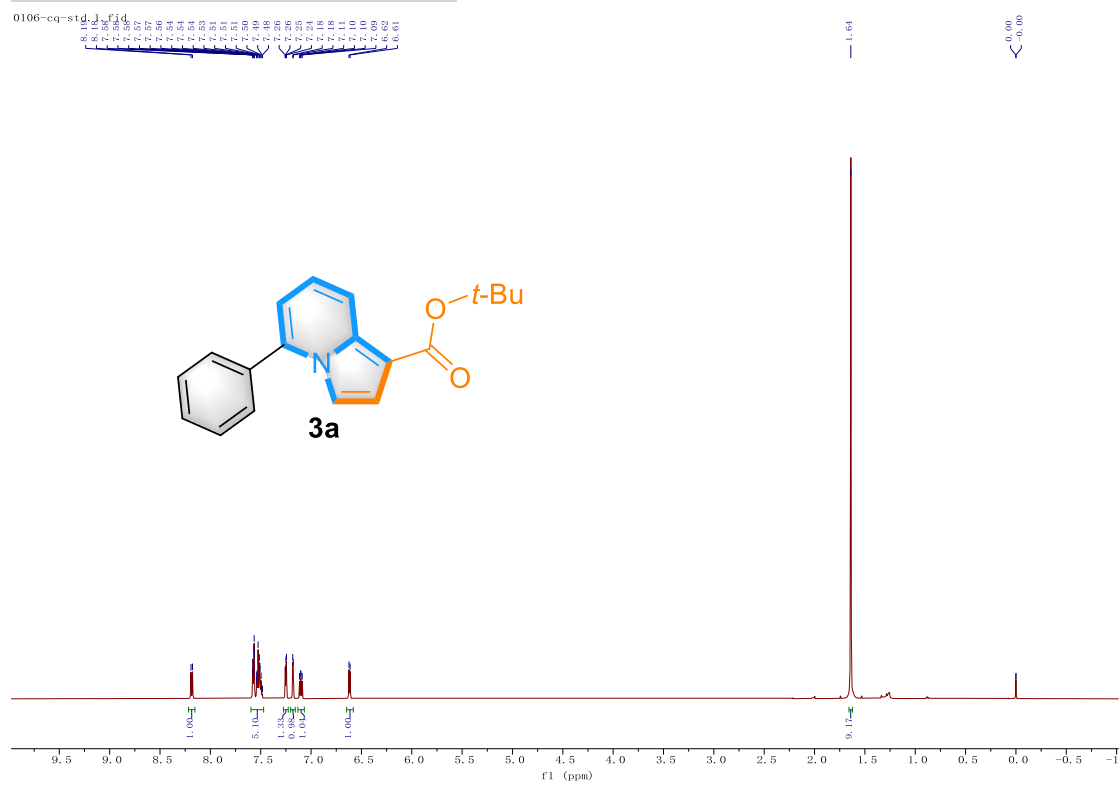

### 151 MHz $^{13}\text{C}$ NMR of **3a** in $\text{CDCl}_3$

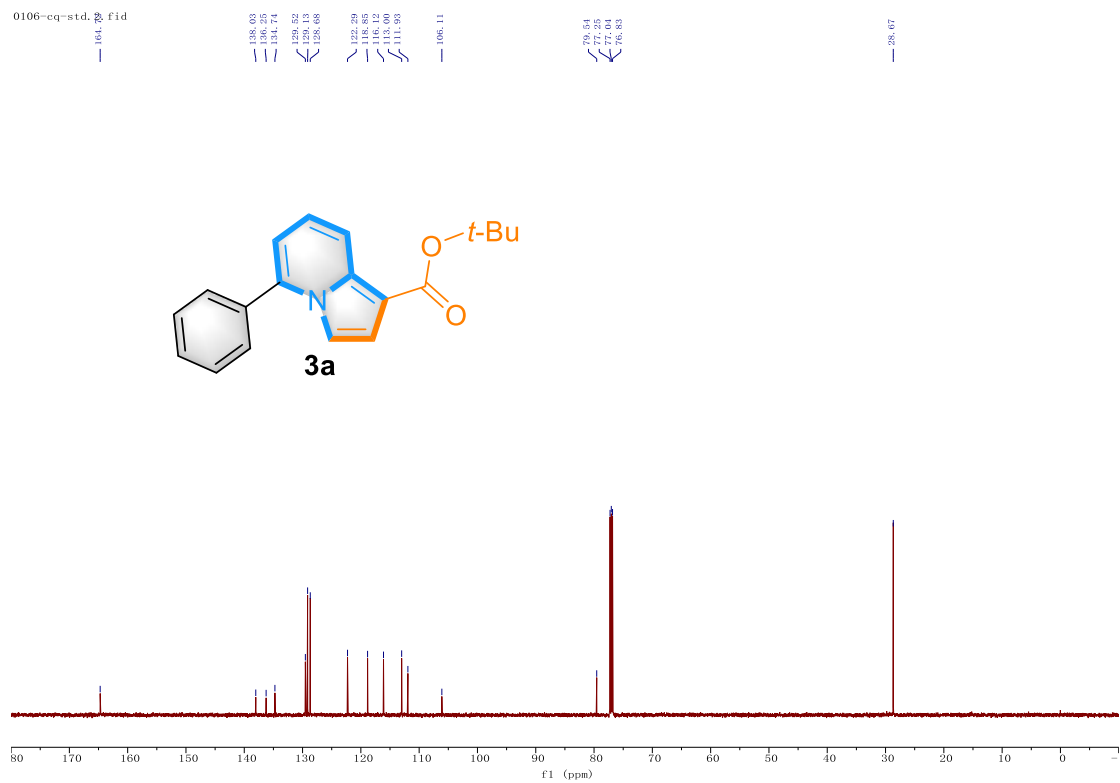

600 MHz  $^1\text{H}$  NMR of **3b** in  $\text{CDCl}_3$

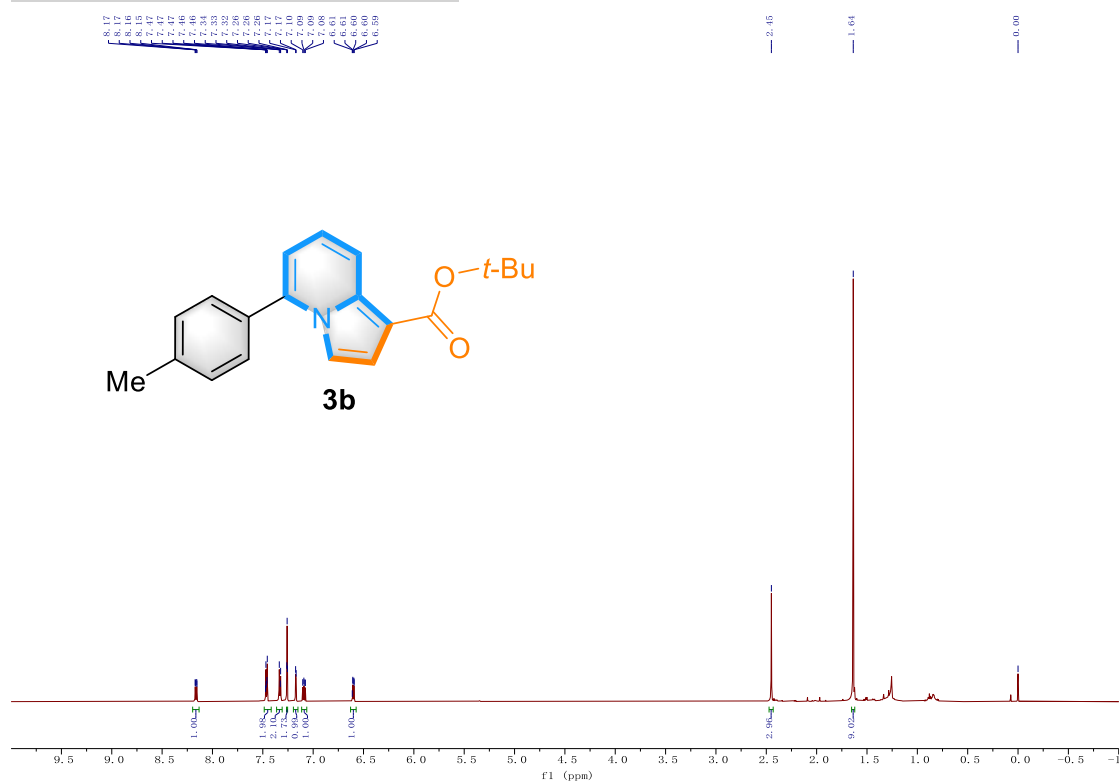

151 MHz  $^{13}\text{C}$  NMR of **3b** in  $\text{CDCl}_3$

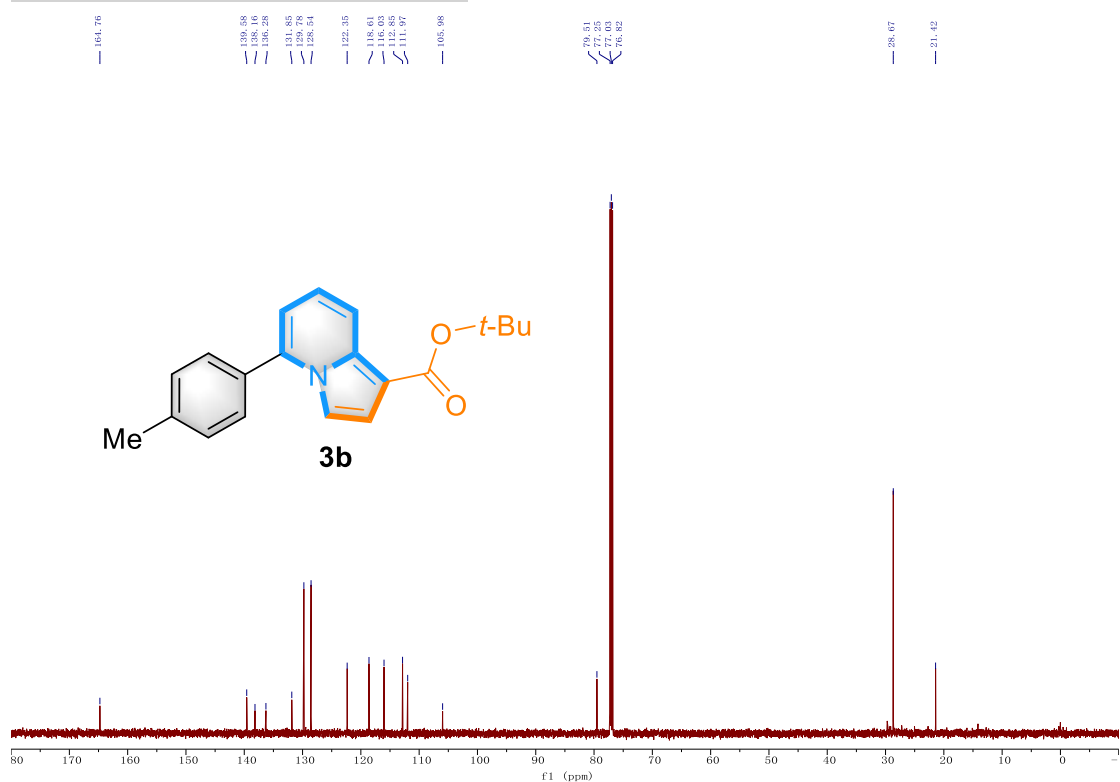

600 MHz  $^1\text{H}$  NMR of **3c** in  $\text{CDCl}_3$

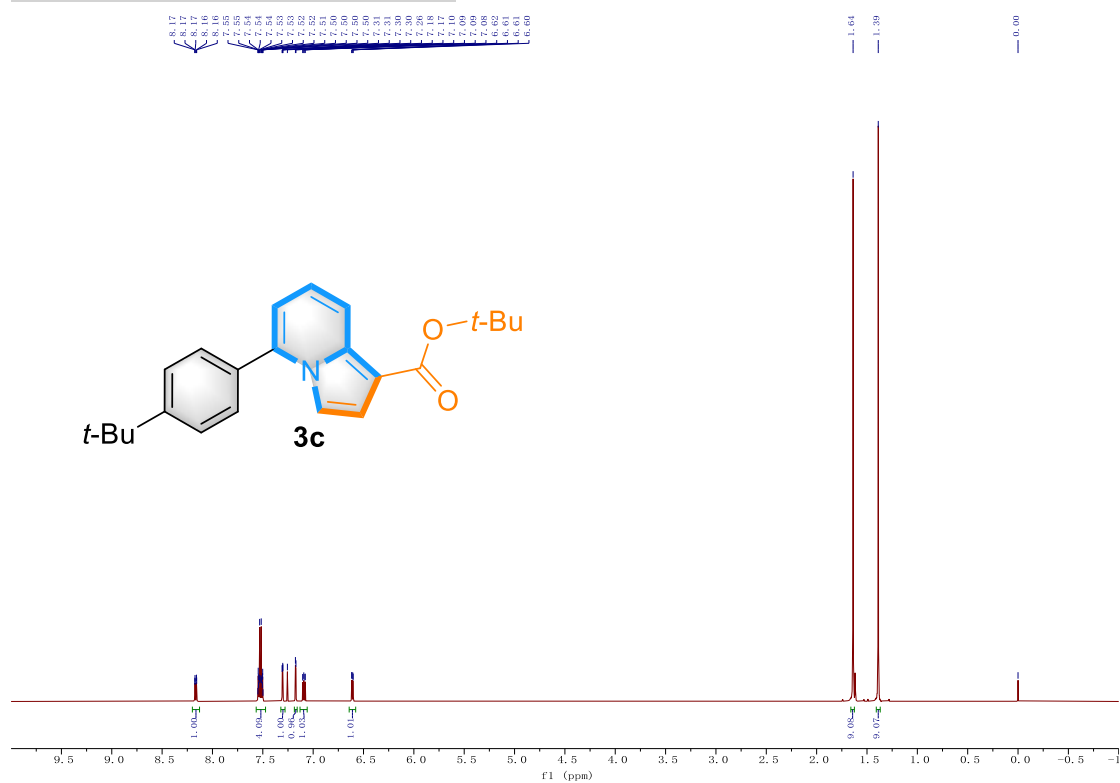

151 MHz  $^{13}\text{C}$  NMR of **3c** in  $\text{CDCl}_3$

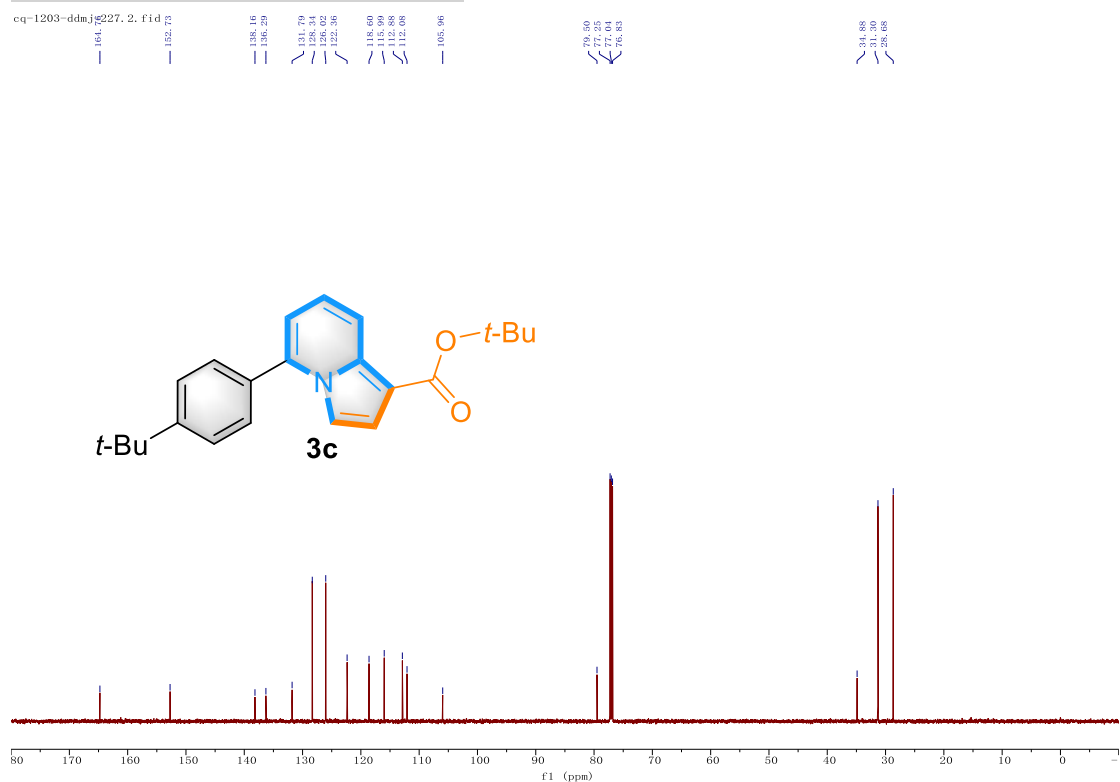

### 600 MHz <sup>1</sup>H NMR of **3d** in CDCl<sub>3</sub>

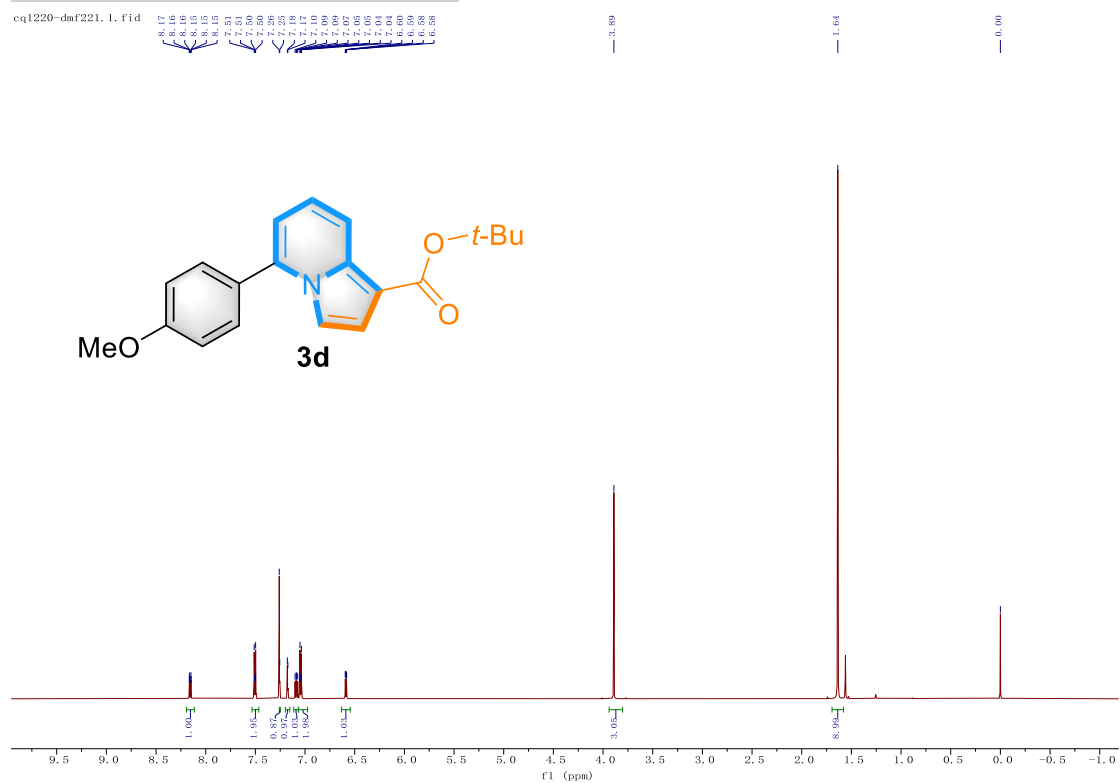

### 151 MHz <sup>13</sup>C NMR of **3d** in CDCl<sub>3</sub>

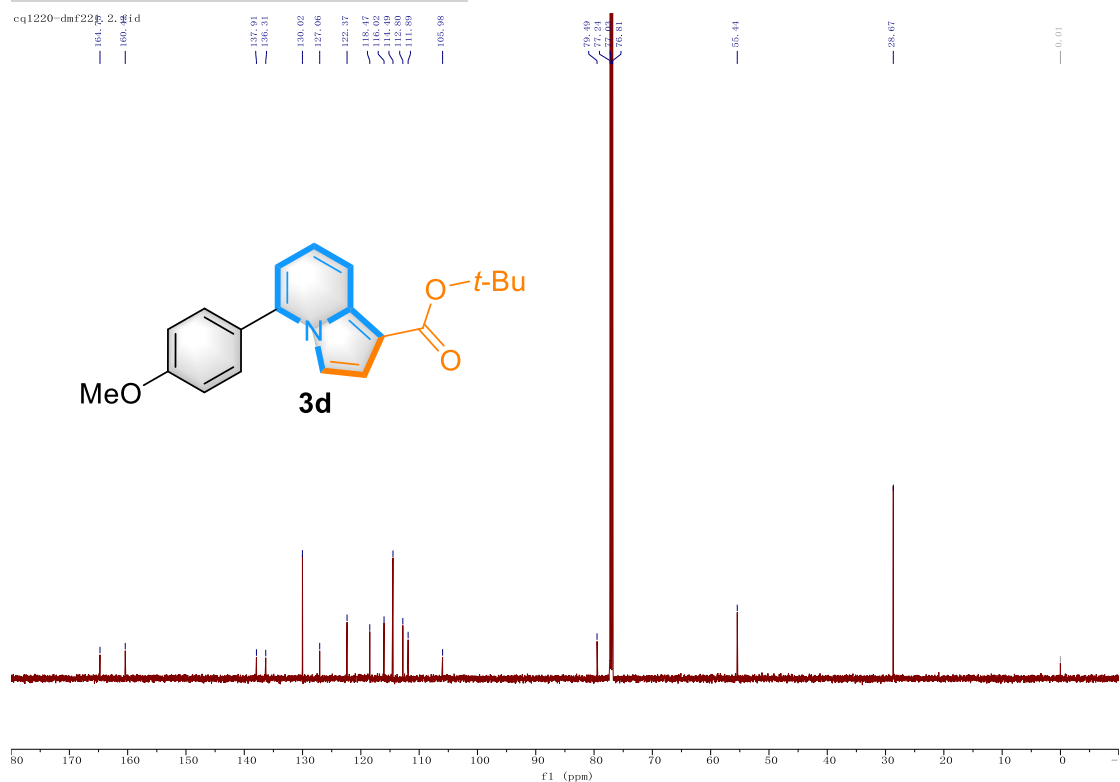

### 600 MHz <sup>1</sup>H NMR of **3e** in CDCl<sub>3</sub>

0322-eq-340.1.fid

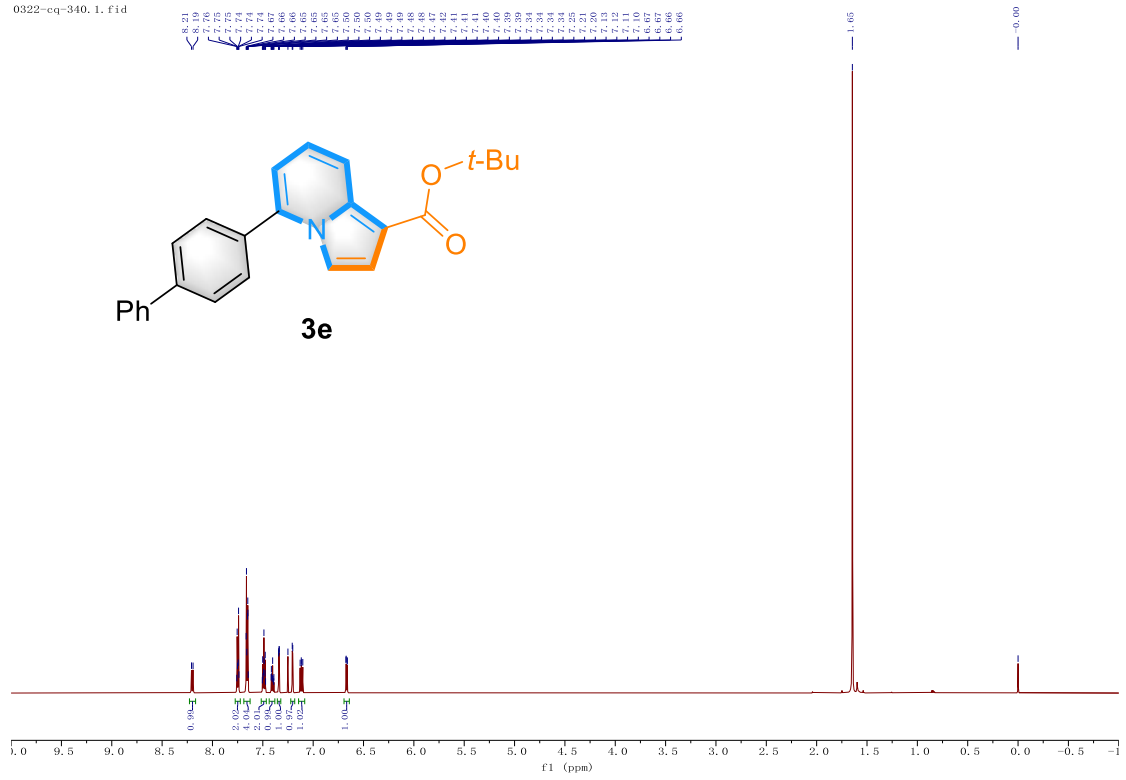

### 151 MHz <sup>13</sup>C NMR of **3e** in CDCl<sub>3</sub>

0322-eq-340.fid

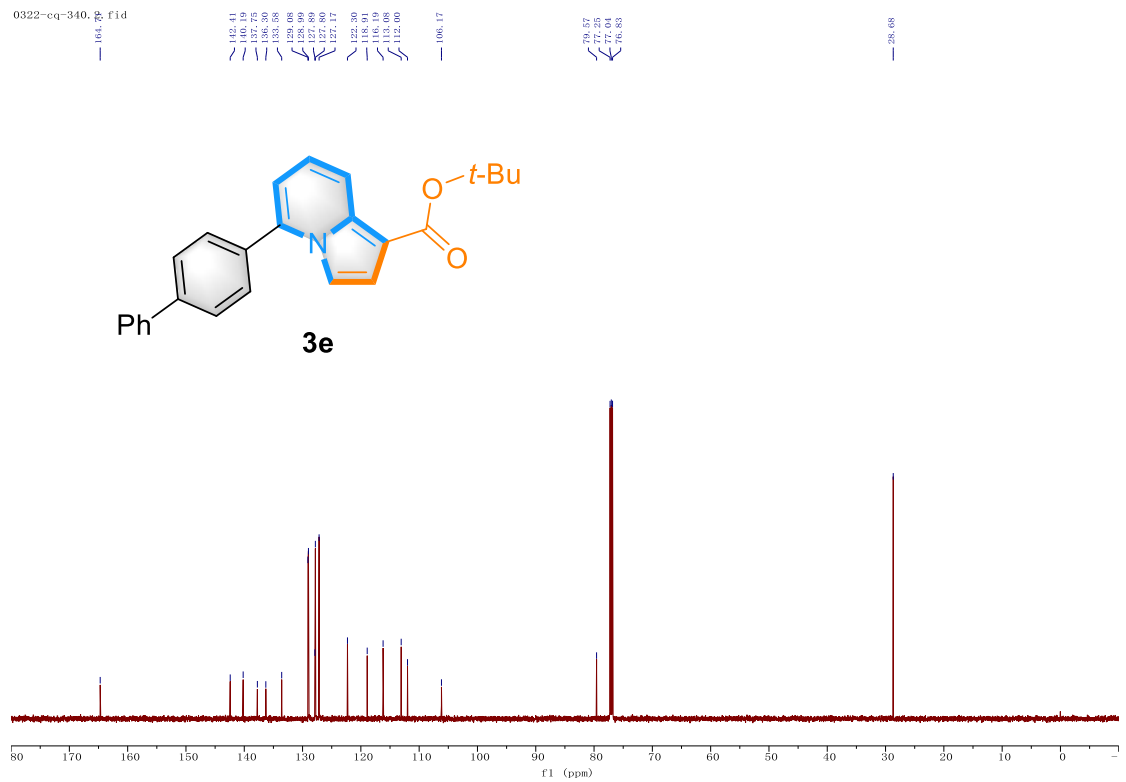

### 600 MHz <sup>1</sup>H NMR of **3f** in CDCl<sub>3</sub>

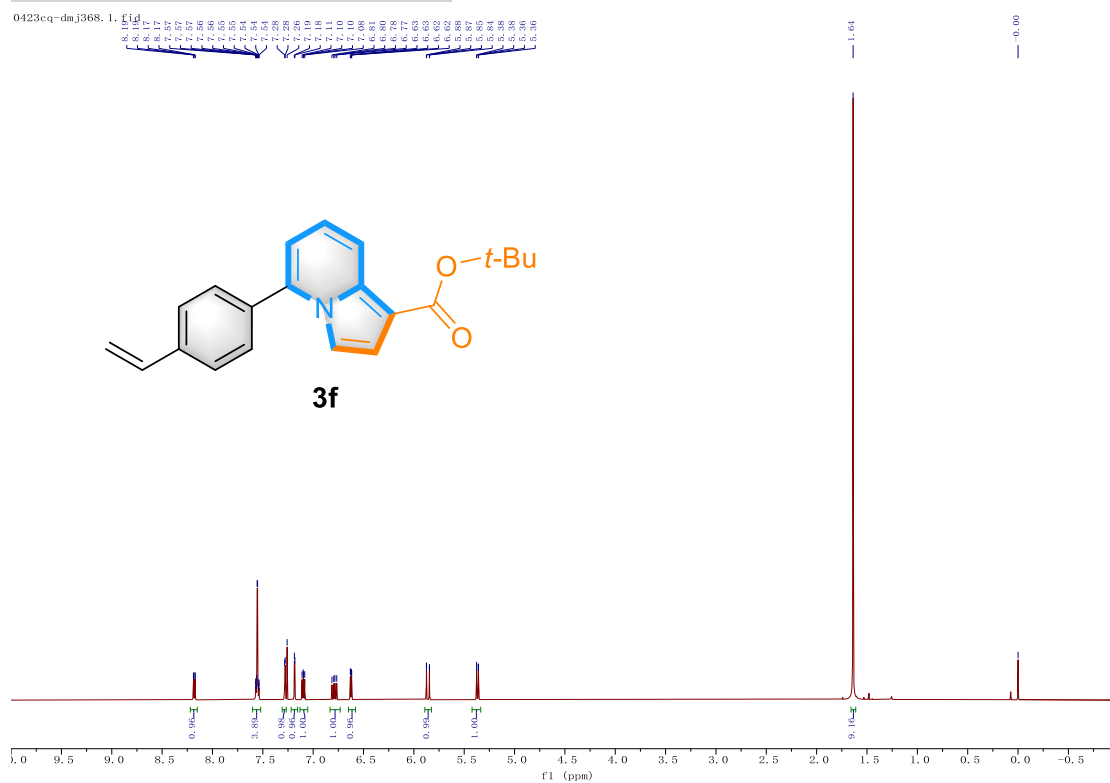

### 151 MHz <sup>13</sup>C NMR of **3f** in CDCl<sub>3</sub>

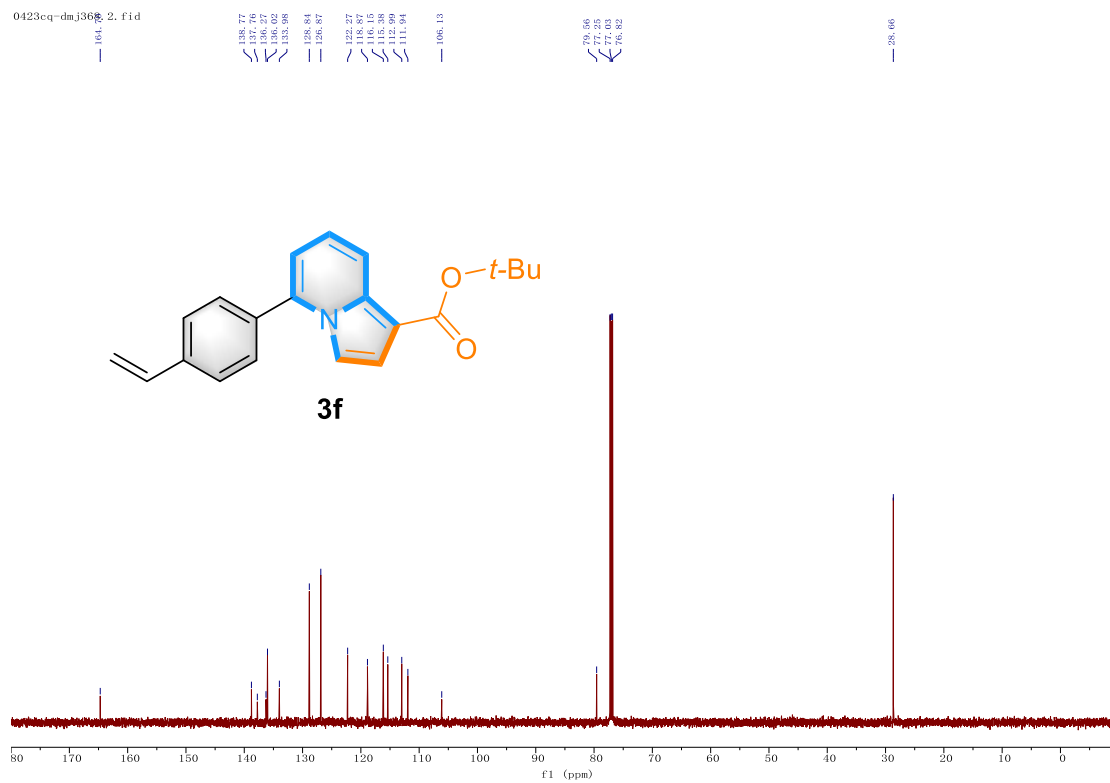

### 600 MHz $^1\text{H}$ NMR of **3g** in $\text{CDCl}_3$

0106-eq-219. 1. fid

8.50  
8.30  
8.19  
8.15  
7.53  
7.52  
7.51  
7.50  
7.30  
7.20  
7.11  
7.09  
6.81  
6.60

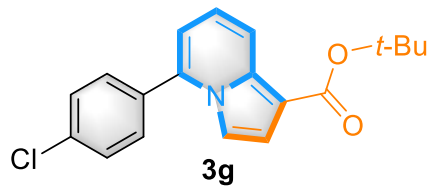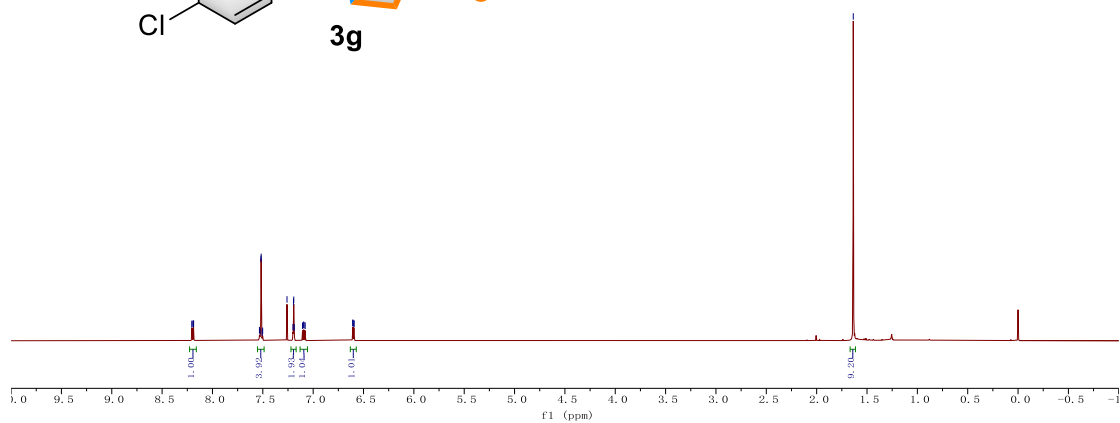

### 151 MHz $^{13}\text{C}$ NMR of **3g** in $\text{CDCl}_3$

0106-eq-219. fid

136.73  
135.90  
135.90  
133.32  
130.05  
129.45  
123.12  
118.23  
116.34  
113.18  
111.09  
106.40

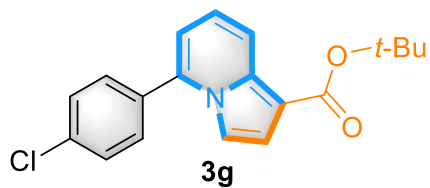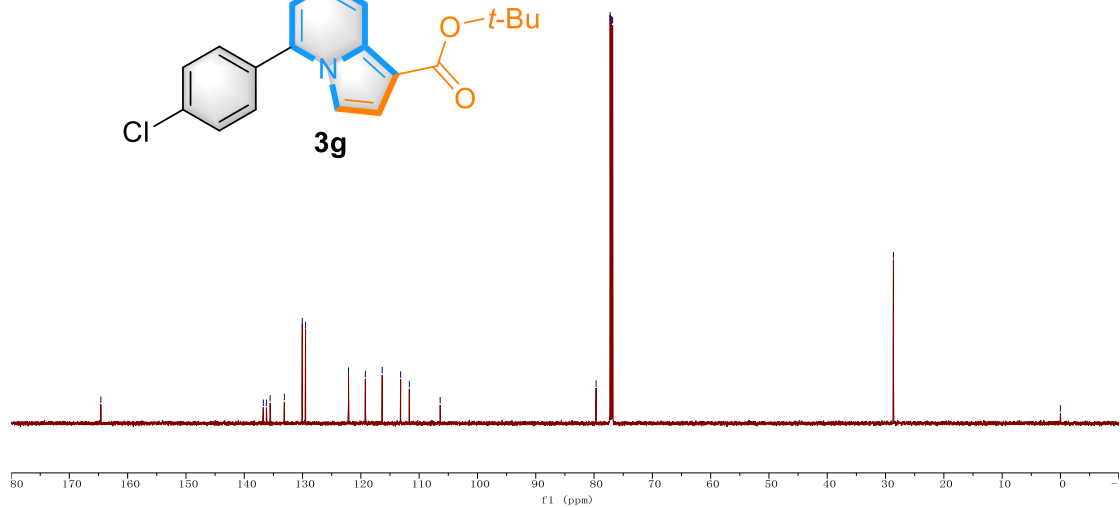

### 600 MHz $^1\text{H}$ NMR of **3h** in $\text{CDCl}_3$

cq0604-609.1.fid

8.25, 8.23, 8.21, 7.88, 7.82, 7.74, 7.62, 7.59, 7.22, 7.19, 7.19, 7.19, 7.19, 7.11, 7.11, 7.11, 7.11, 6.05, 6.05, 6.03, 6.03

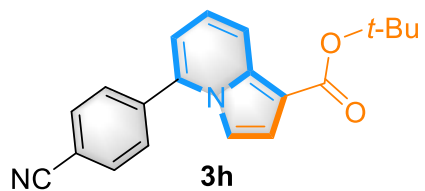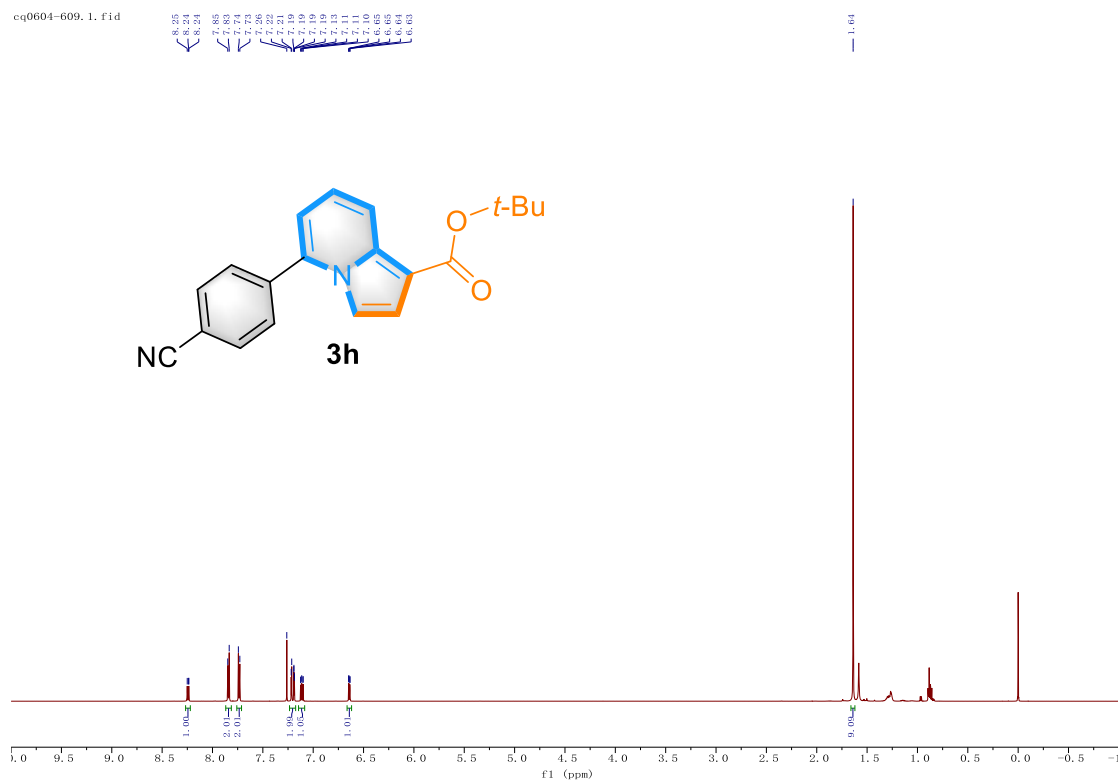

### 151 MHz $^{13}\text{C}$ NMR of **3h** in $\text{CDCl}_3$

164.43, 138.13, 138.13, 137.72, 133.04, 128.40, 127.02, 126.15, 118.15, 116.70, 113.42, 111.46, 106.88, 79.86, 77.63, 77.62, 28.42, 0.00

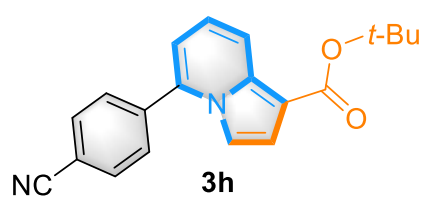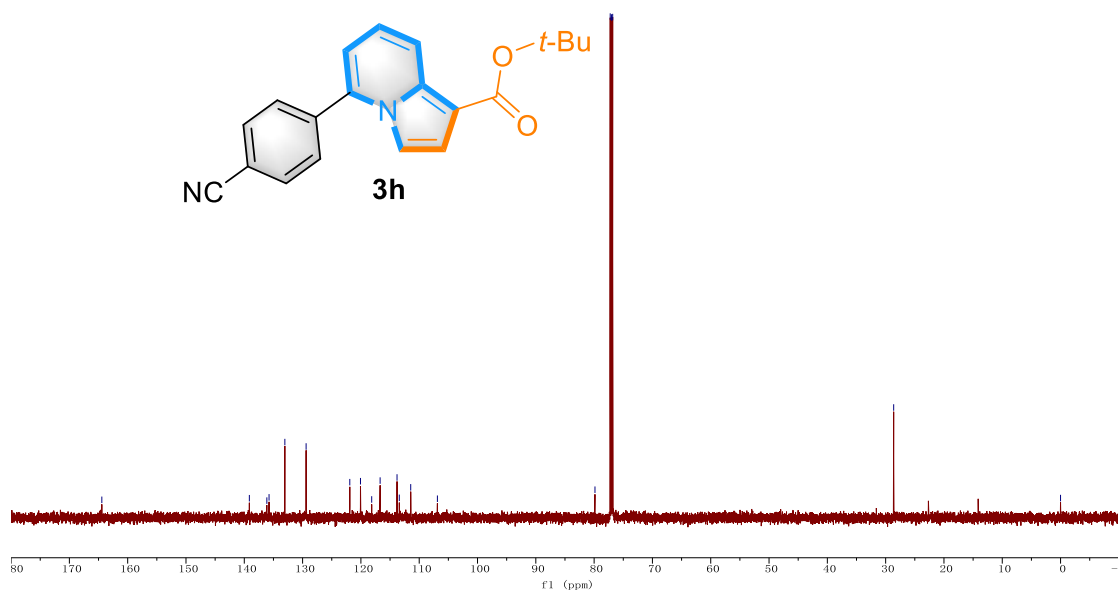



### 600 MHz <sup>1</sup>H NMR of **3i** in CDCl<sub>3</sub>

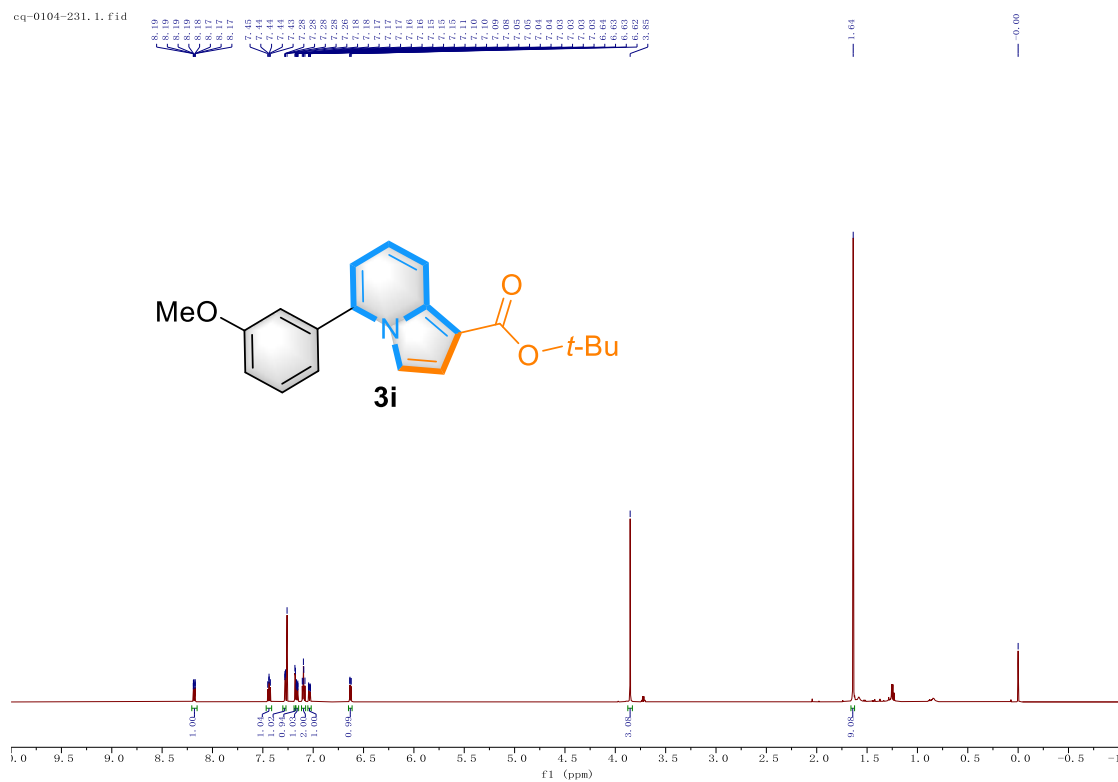

### 151 MHz <sup>13</sup>C NMR of **3i** in CDCl<sub>3</sub>

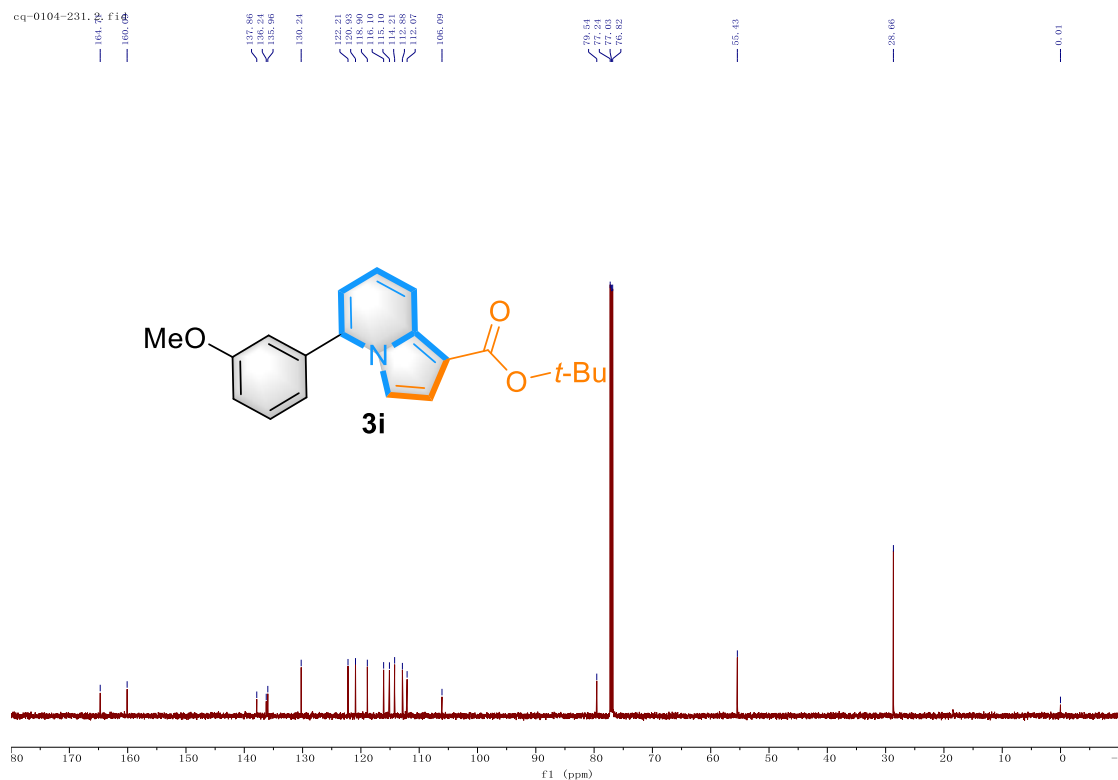

### 600 MHz <sup>1</sup>H NMR of **3j** in CDCl<sub>3</sub>

cq-0123-dmj-223.1.fid

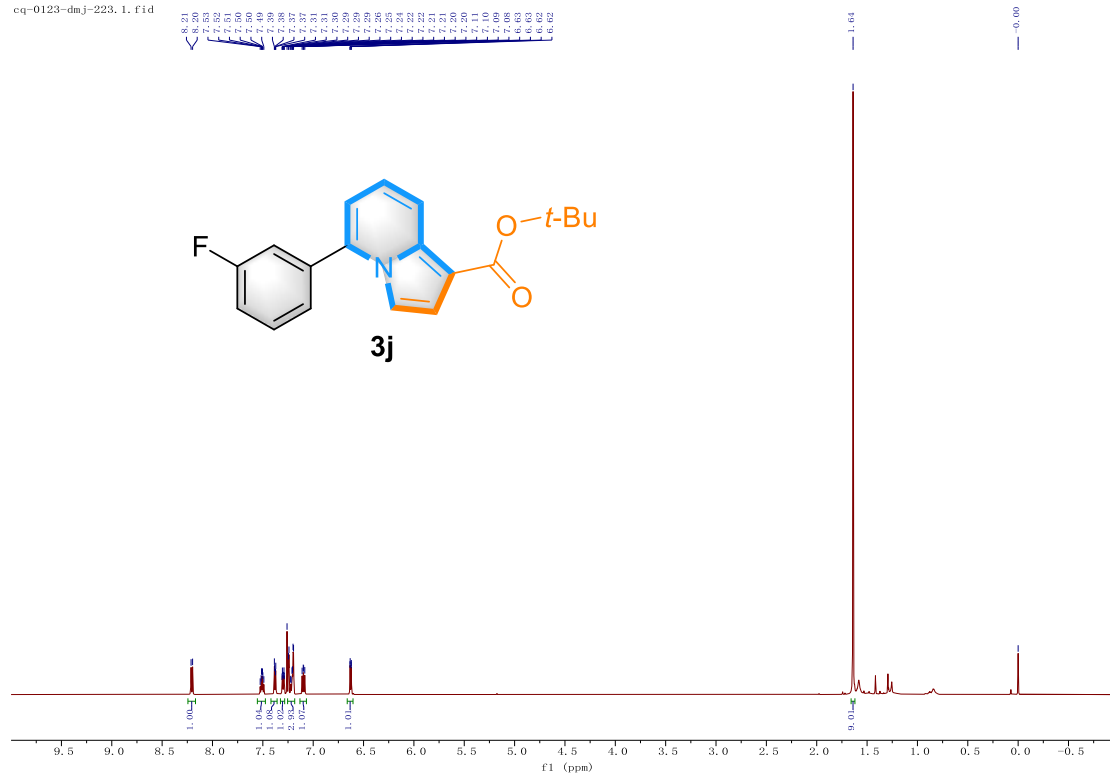

### 151 MHz <sup>13</sup>C NMR of **3j** in CDCl<sub>3</sub>

cq-0123-dmj-223.2.fid

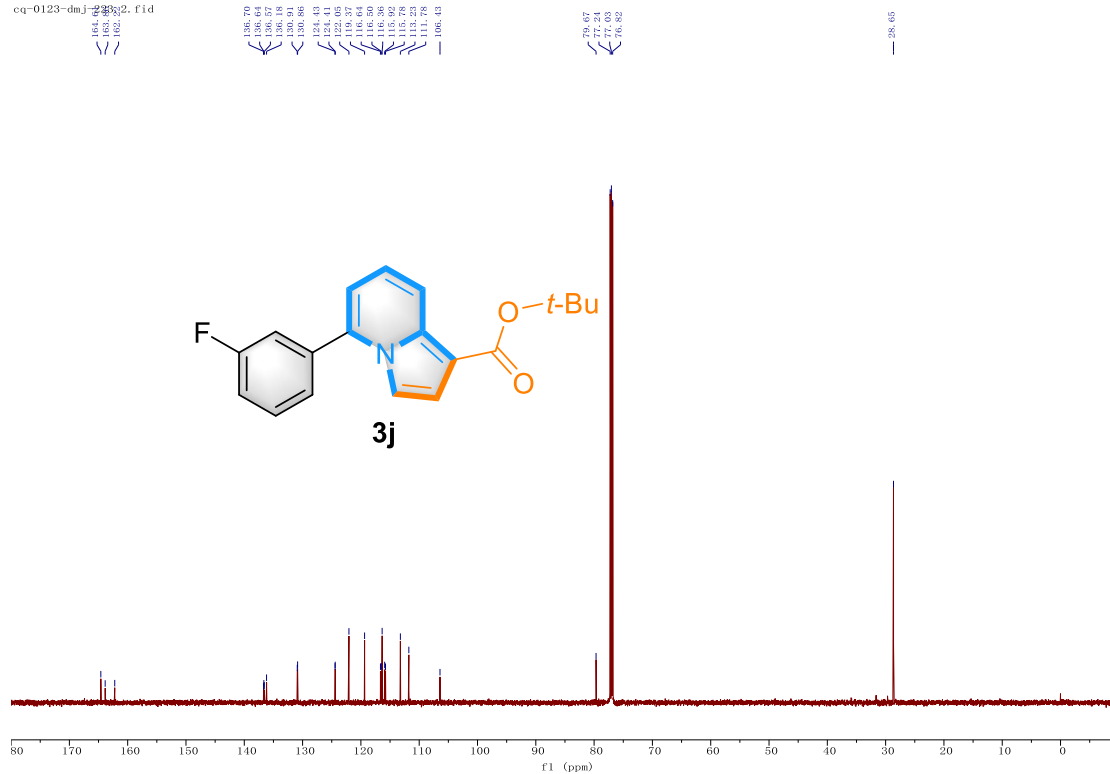

600 MHz  $^1\text{H}$  NMR of **3k** in  $\text{CDCl}_3$

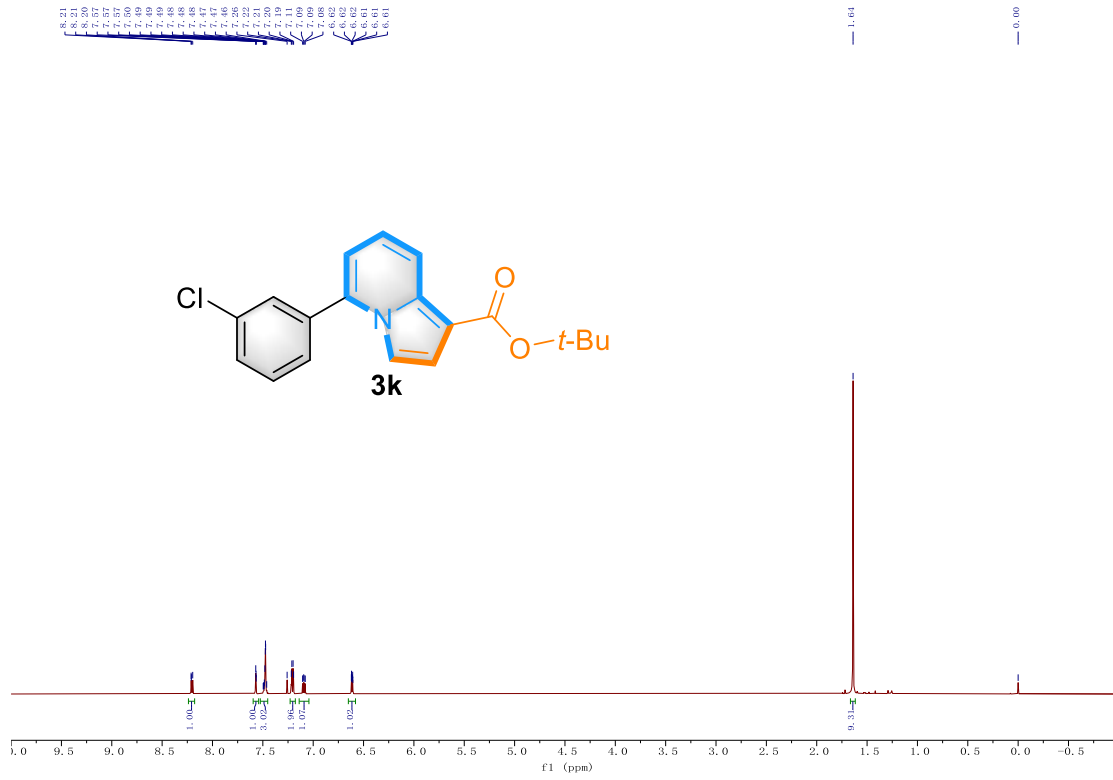

151 MHz  $^{13}\text{C}$  NMR of **3k** in  $\text{CDCl}_3$

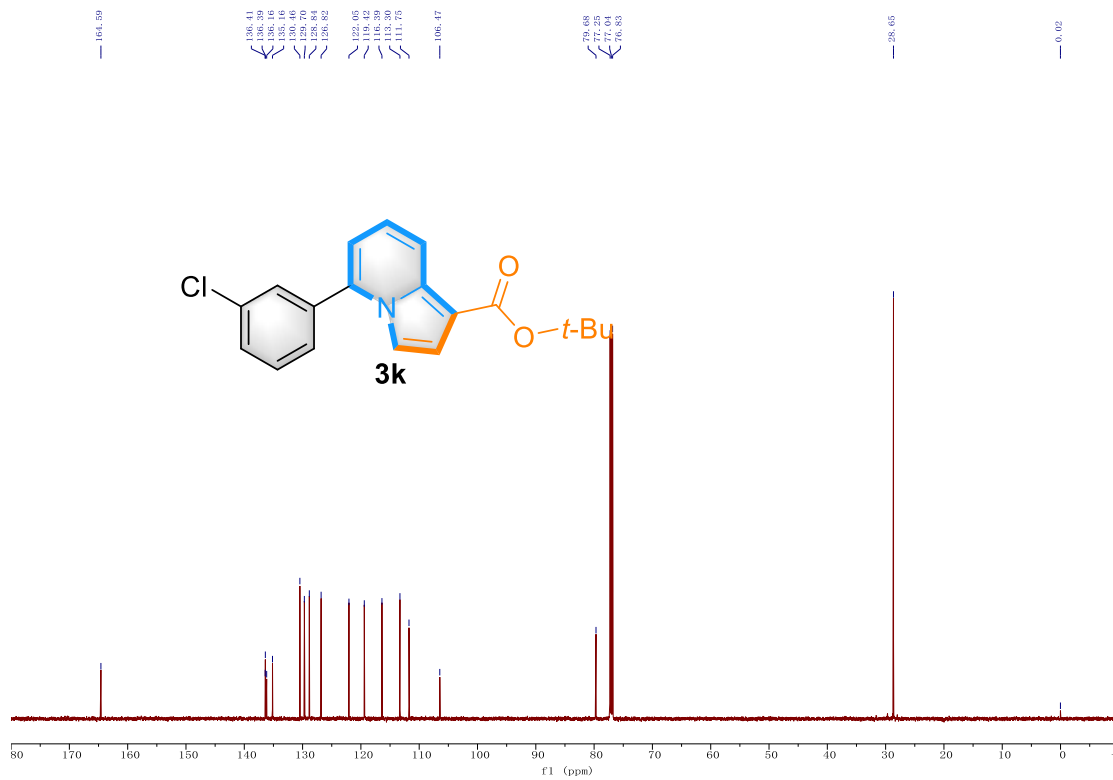

# 600 MHz <sup>1</sup>H NMR of **31** in CDCl<sub>3</sub>

0322-cq-320.1.fid

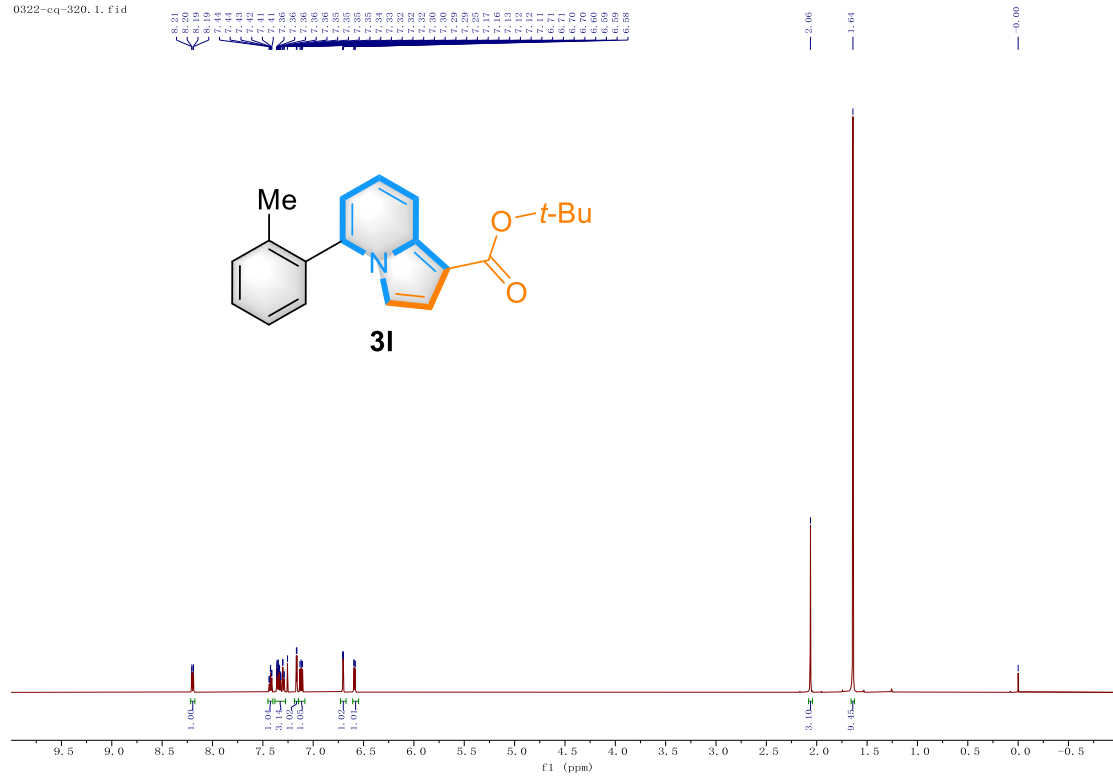

# 151 MHz <sup>13</sup>C NMR of **31** in CDCl<sub>3</sub>

0322-cq-320.fid

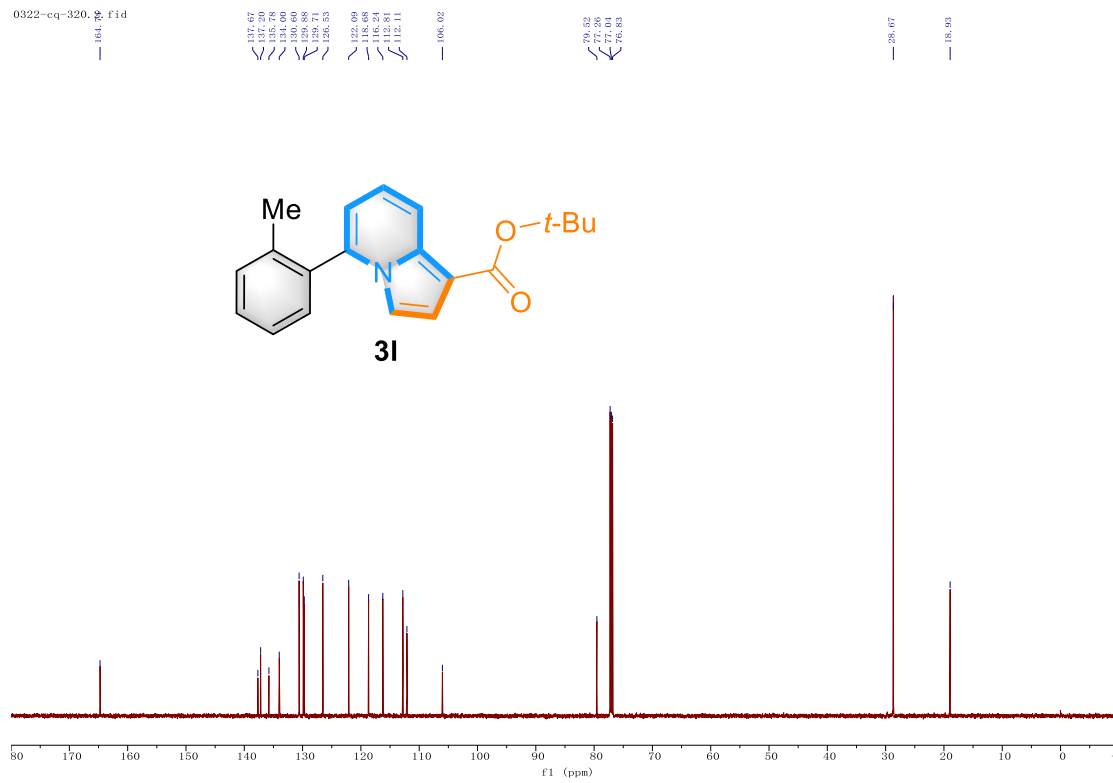

## 600 MHz <sup>1</sup>H NMR of **3m** in CDCl<sub>3</sub>

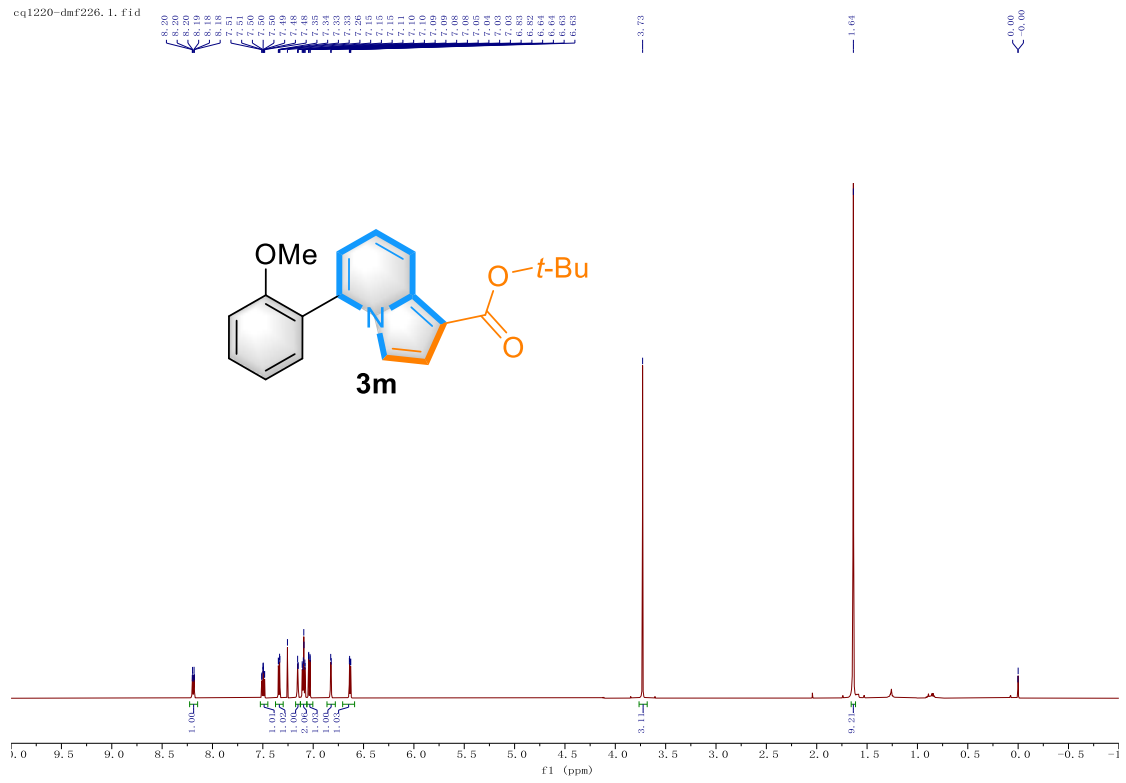

## 151 MHz <sup>13</sup>C NMR of **3m** in CDCl<sub>3</sub>

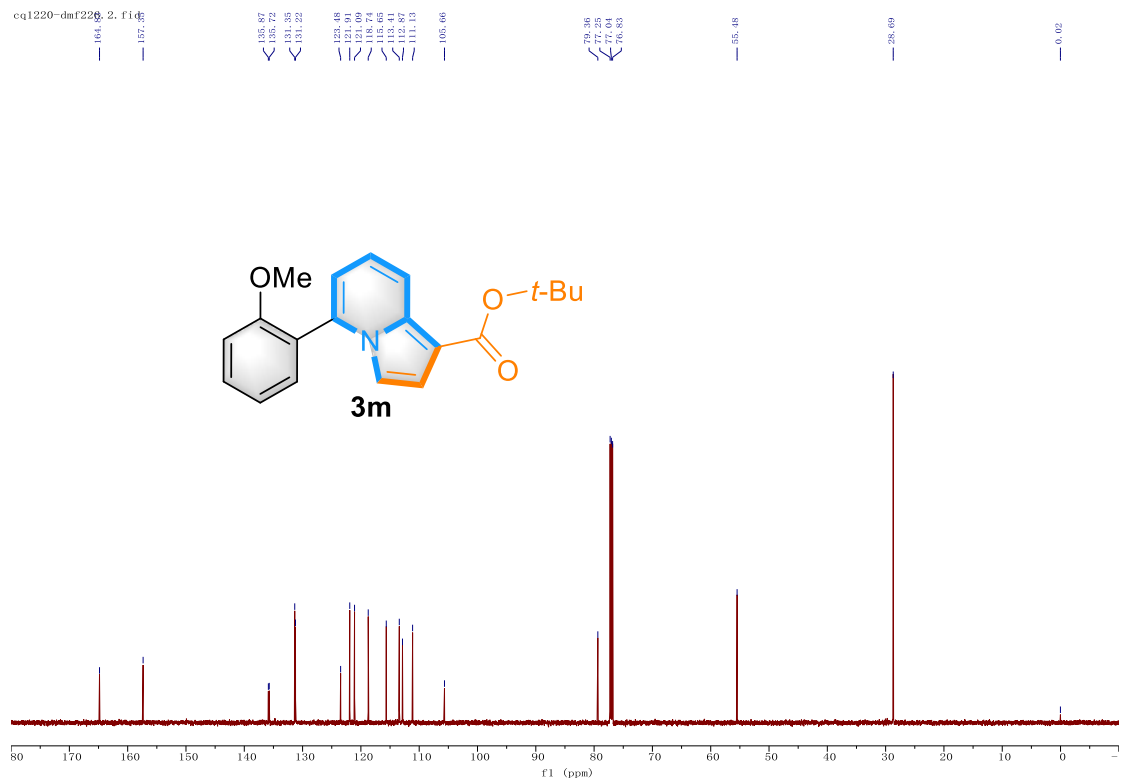

600 MHz  $^1\text{H}$  NMR of **3n** in  $\text{CDCl}_3$

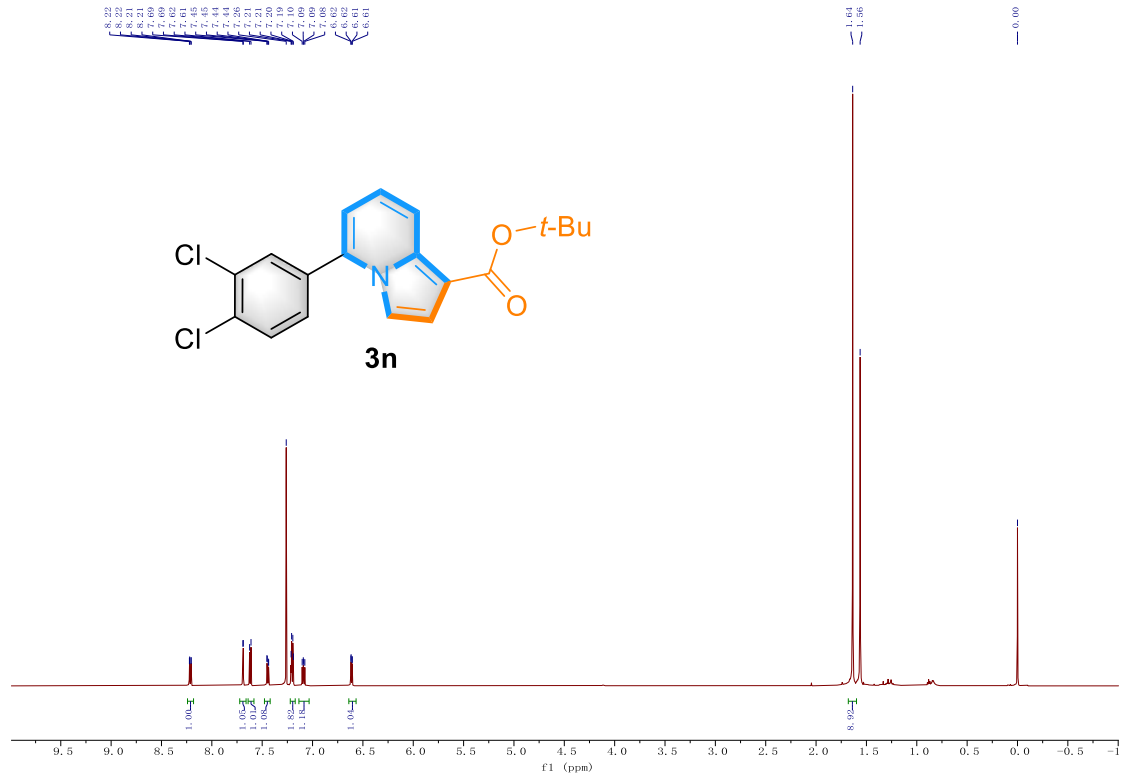

151 MHz  $^{13}\text{C}$  NMR of **3n** in  $\text{CDCl}_3$

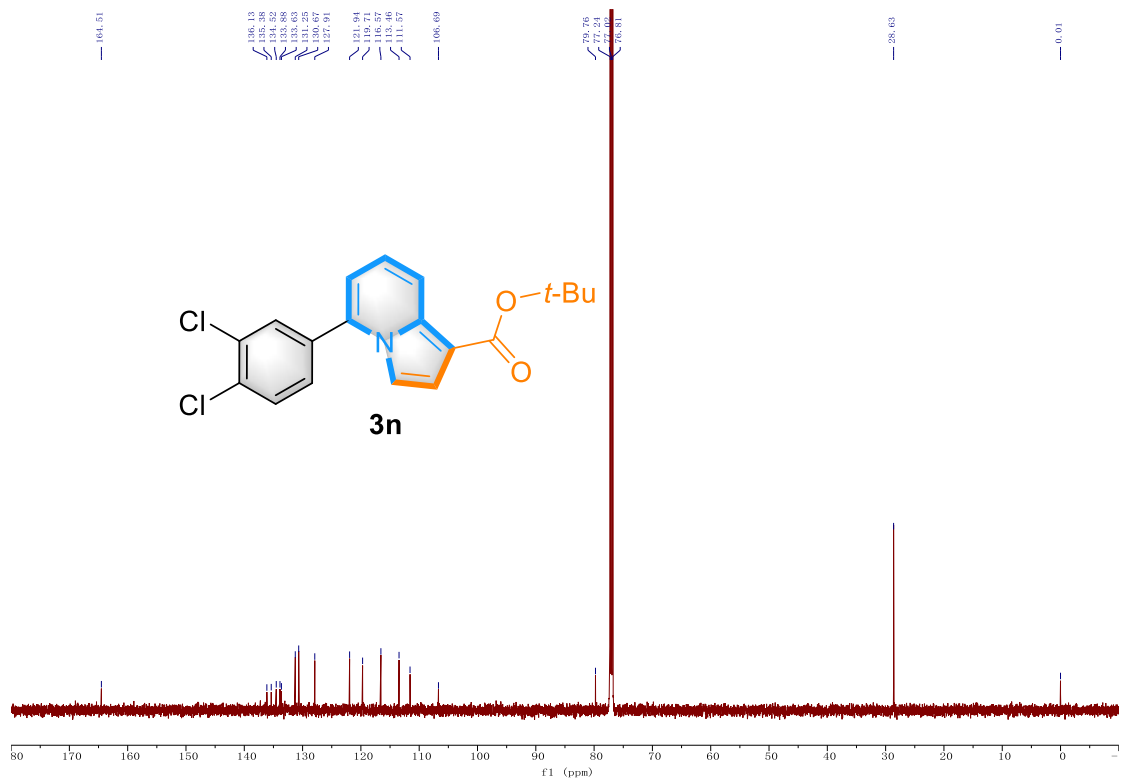

600 MHz <sup>1</sup>H NMR of **3o** in CDCl<sub>3</sub>

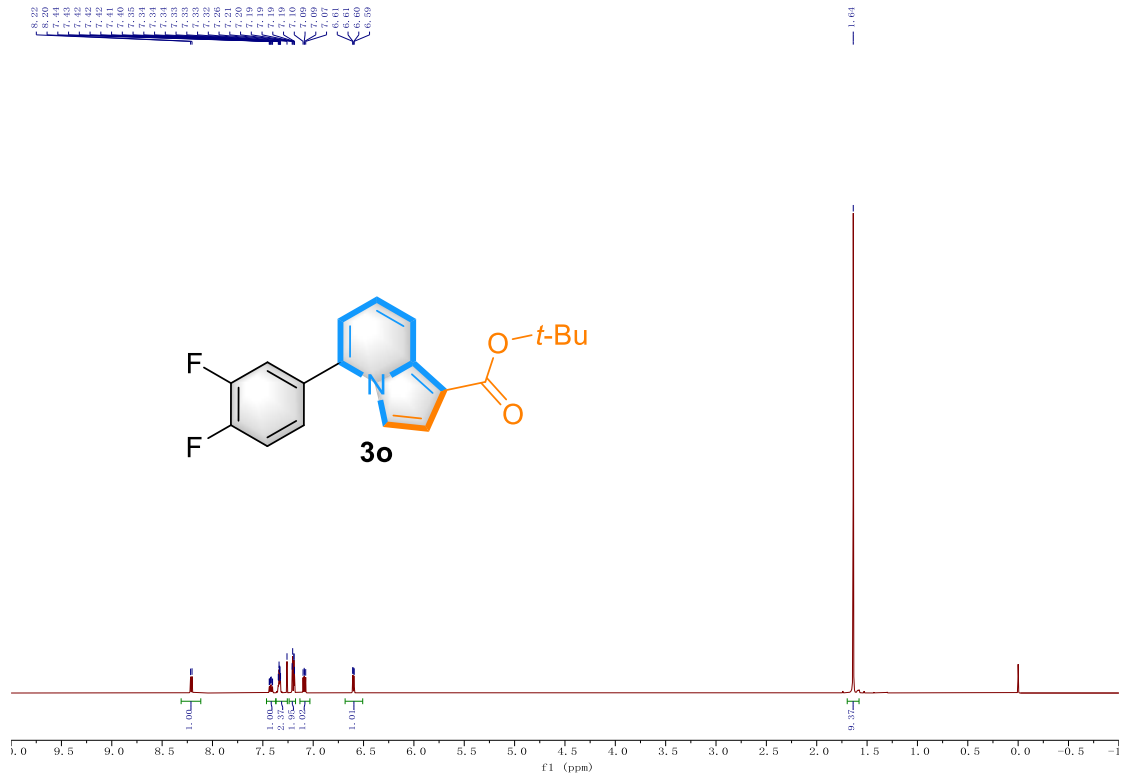

151 MHz <sup>13</sup>C NMR of **3o** in CDCl<sub>3</sub>

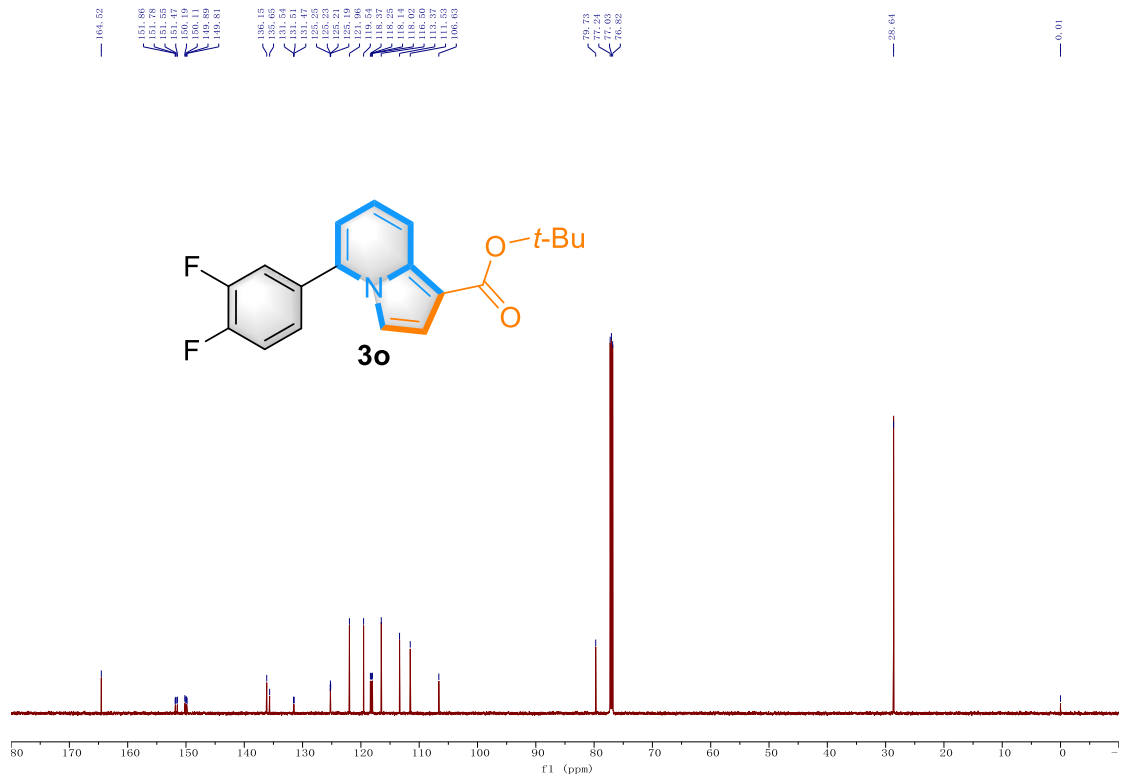

600 MHz  $^1\text{H}$  NMR of **3p** in  $\text{CDCl}_3$

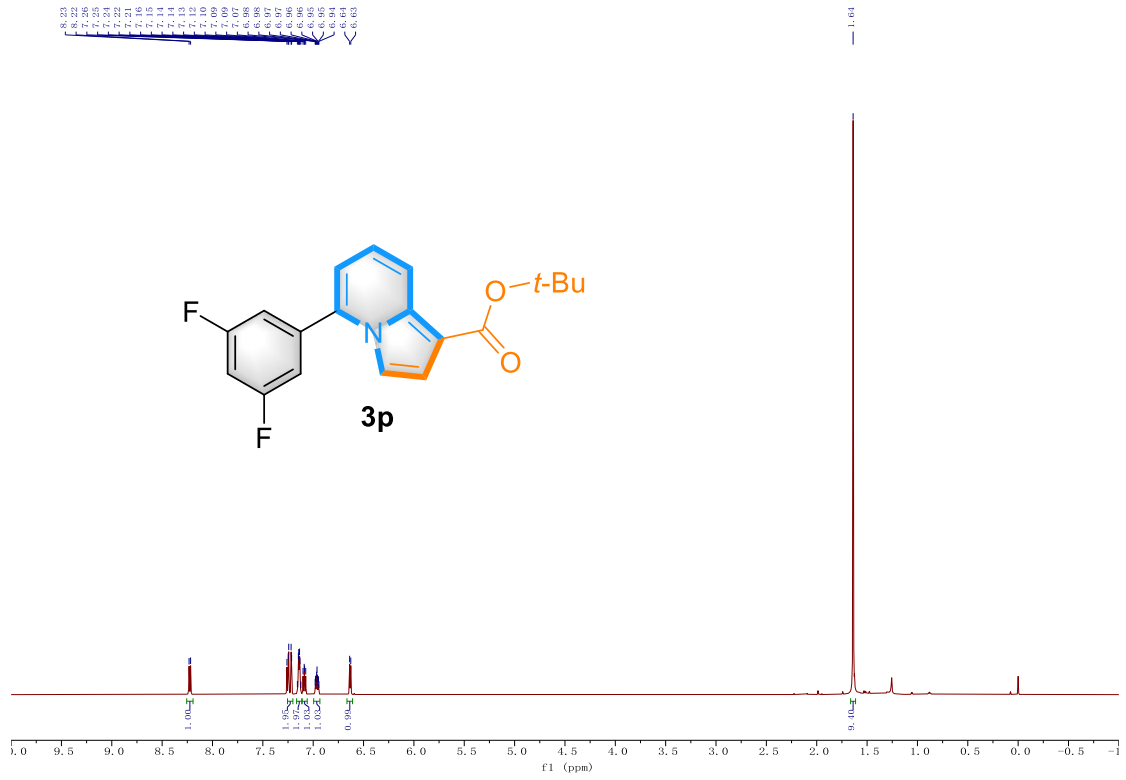

151 MHz  $^{13}\text{C}$  NMR of **3p** in  $\text{CDCl}_3$

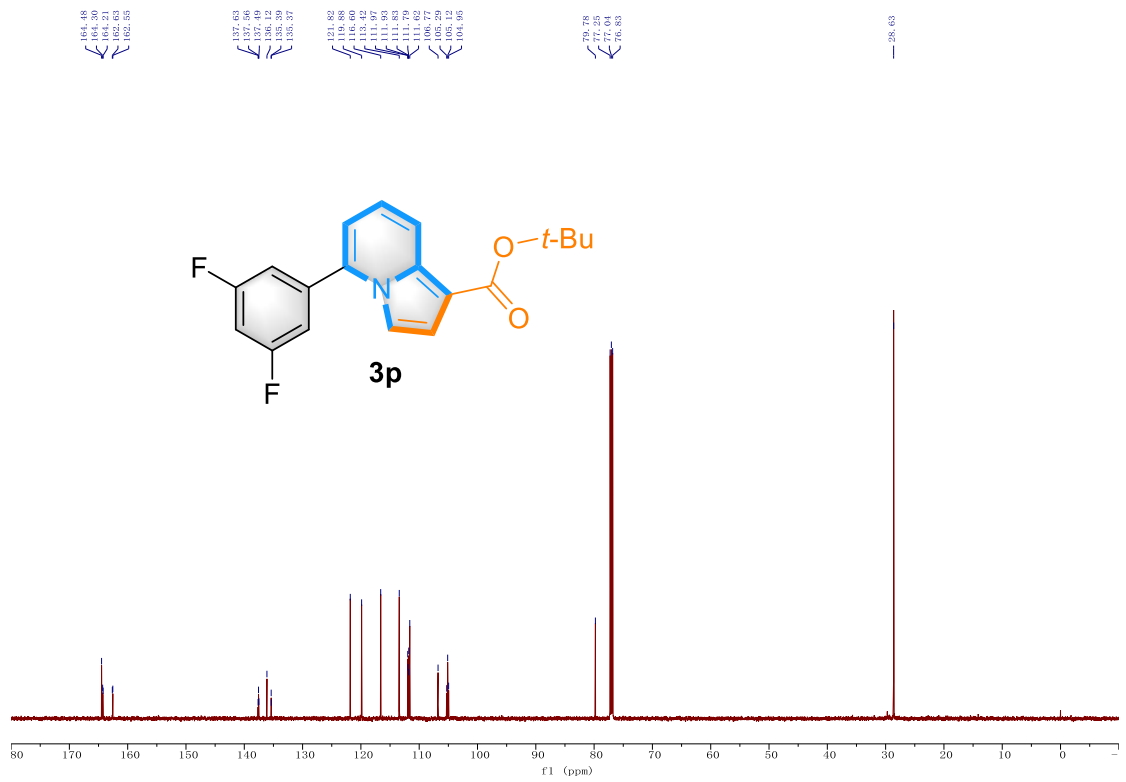



600 MHz  $^1\text{H}$  NMR of **3q** in  $\text{CDCl}_3$

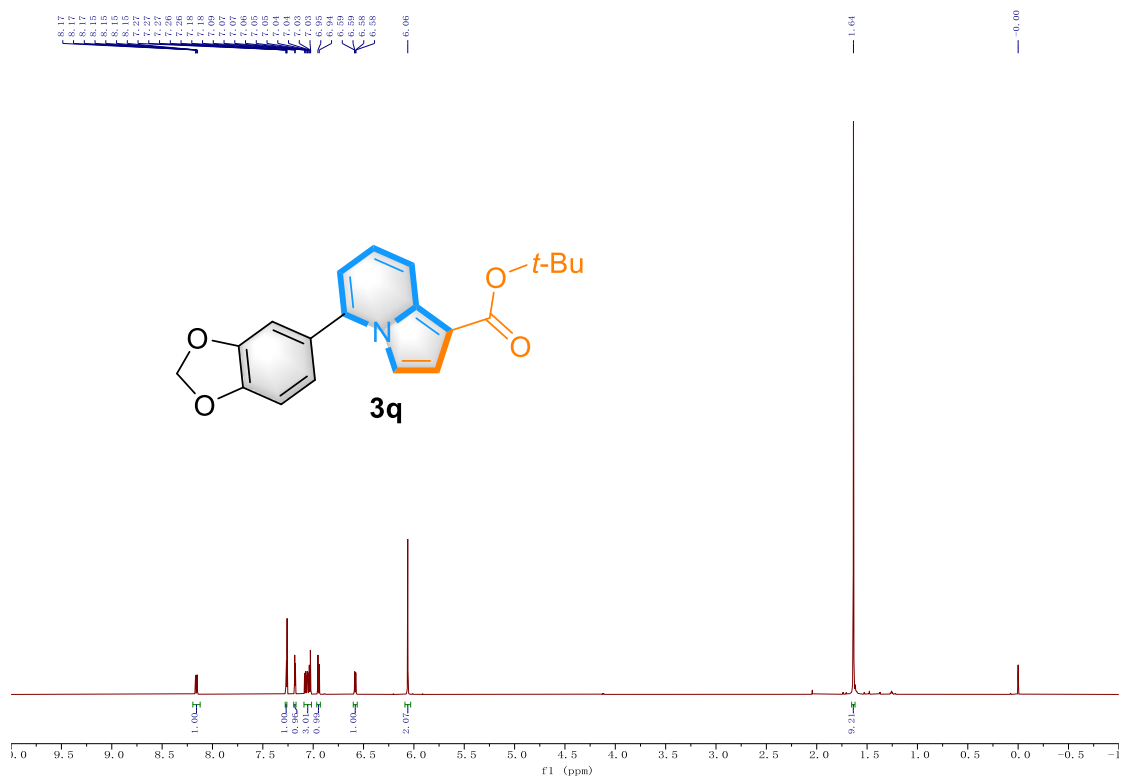

151 MHz  $^{13}\text{C}$  NMR of **3q** in  $\text{CDCl}_3$

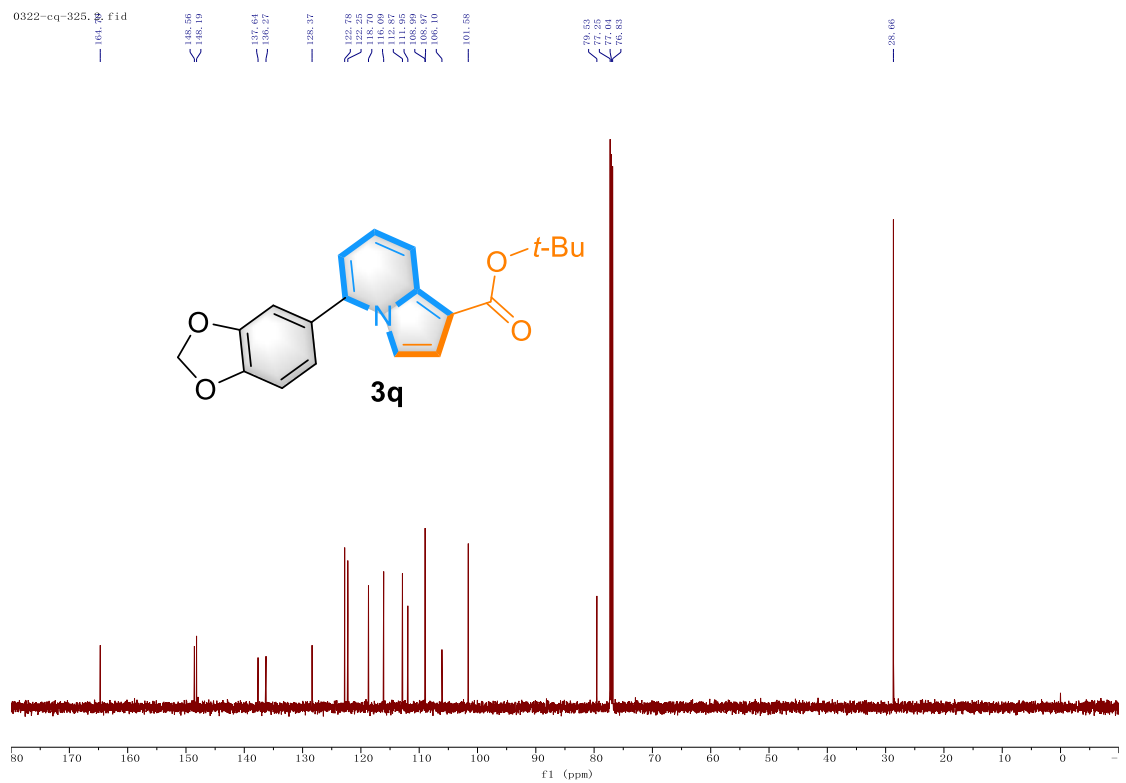

### 600 MHz $^1\text{H}$ NMR of **3r** in $\text{CDCl}_3$

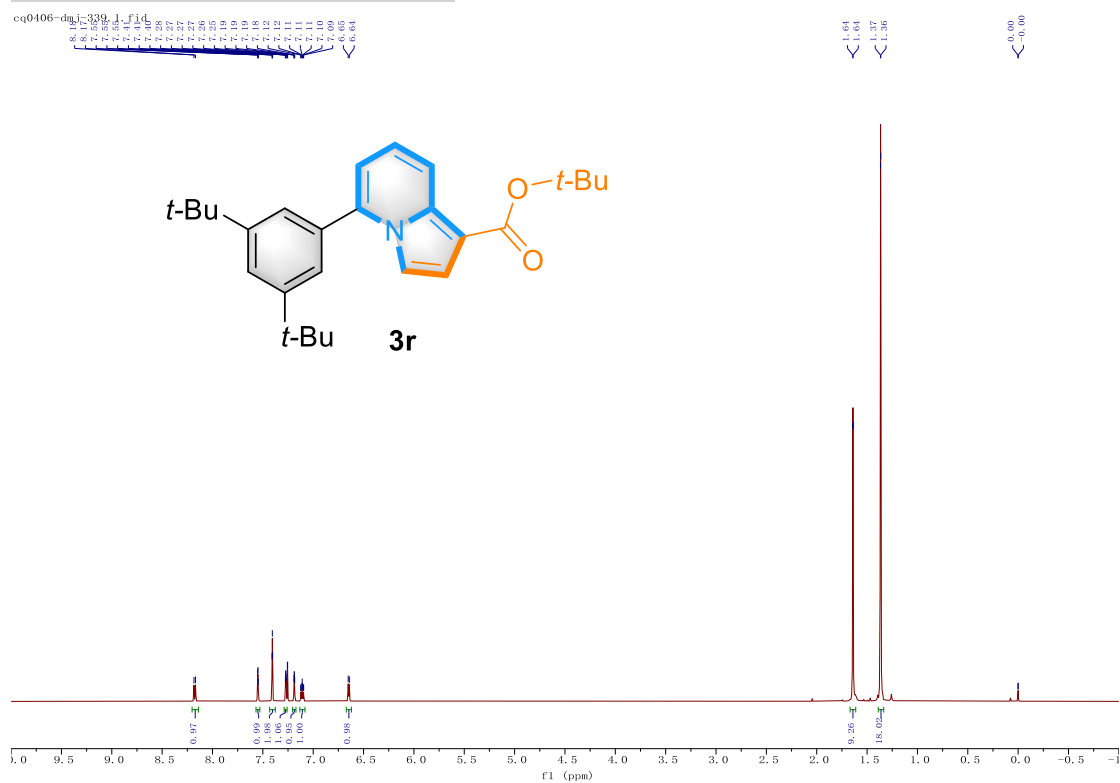

### 151 MHz $^{13}\text{C}$ NMR of **3r** in $\text{CDCl}_3$

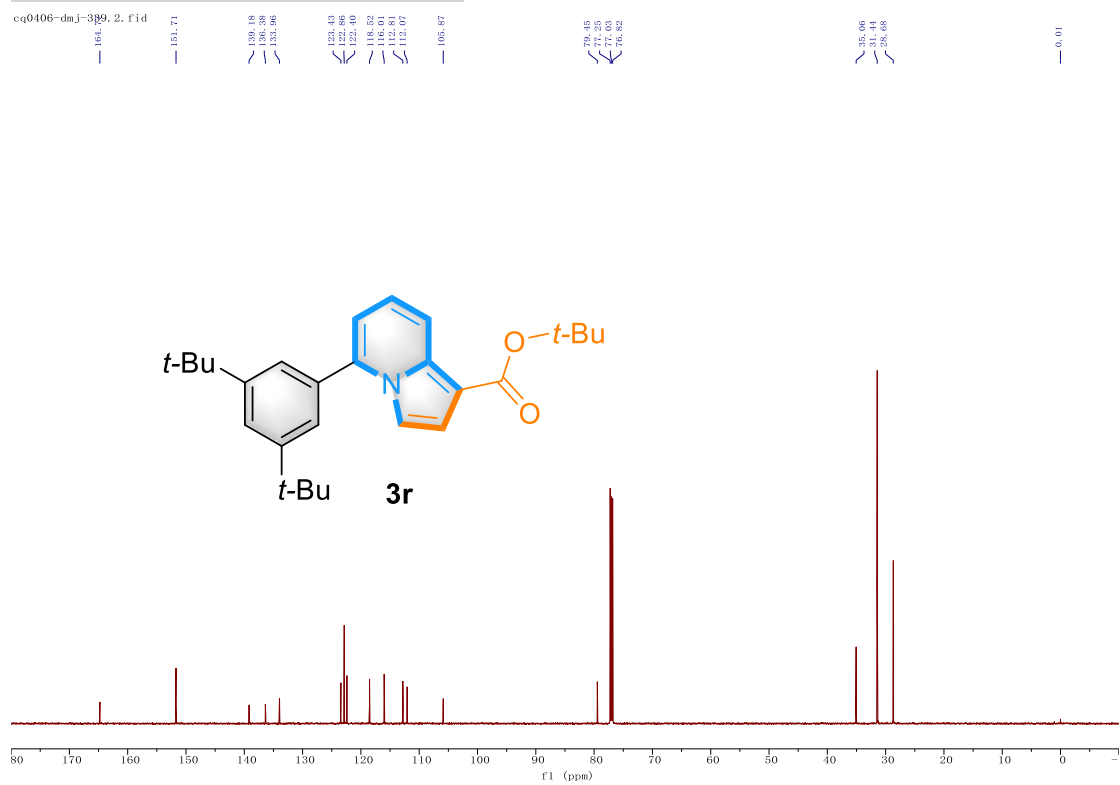

600 MHz  $^1\text{H}$  NMR of **3s** in  $\text{CDCl}_3$

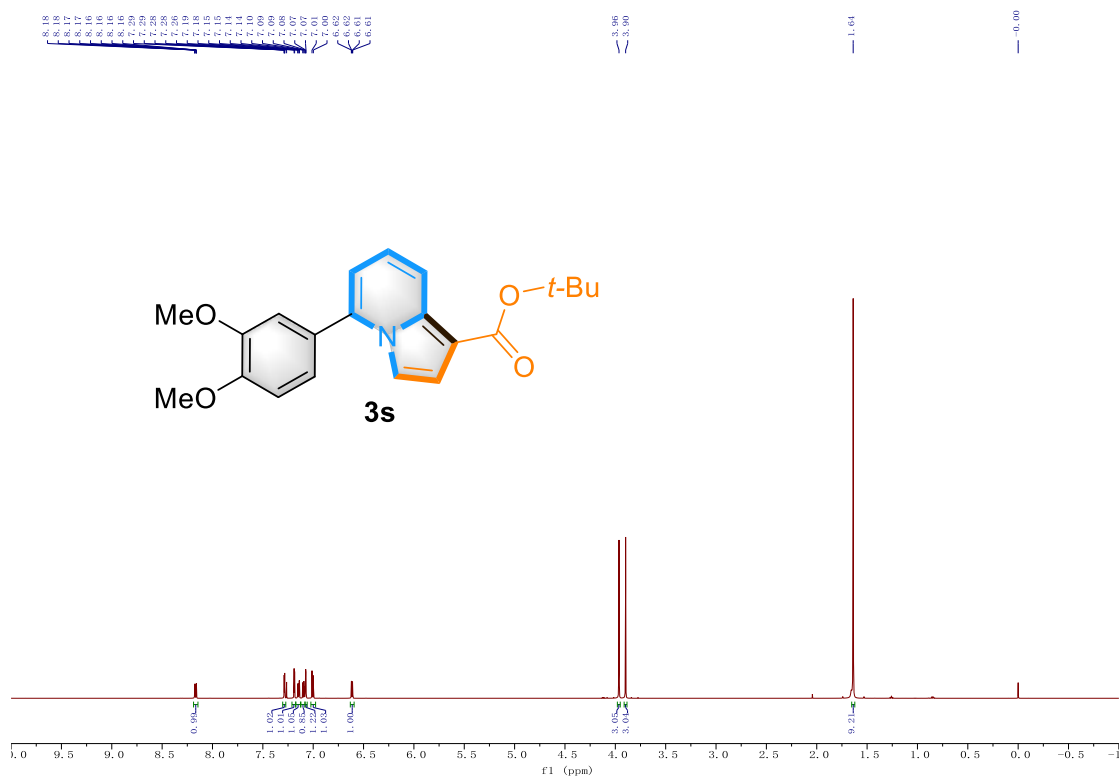

151 MHz  $^{13}\text{C}$  NMR of **3s** in  $\text{CDCl}_3$

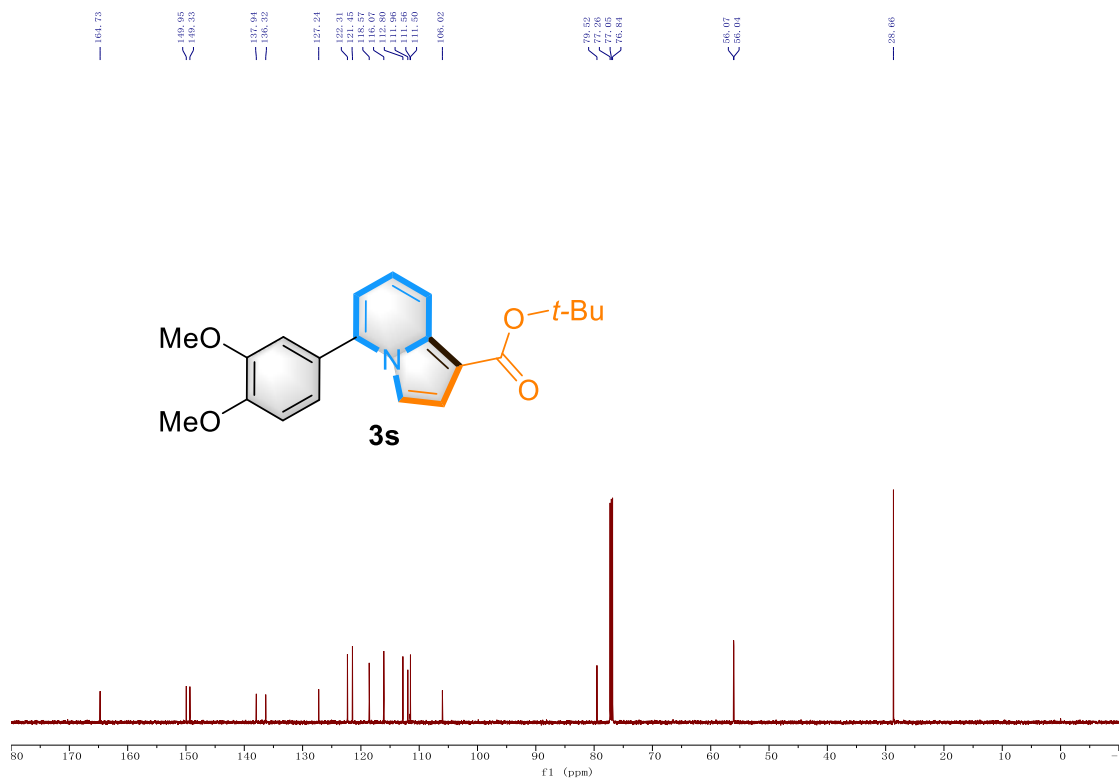



600 MHz  $^1\text{H}$  NMR of **3u** in  $\text{CDCl}_3$

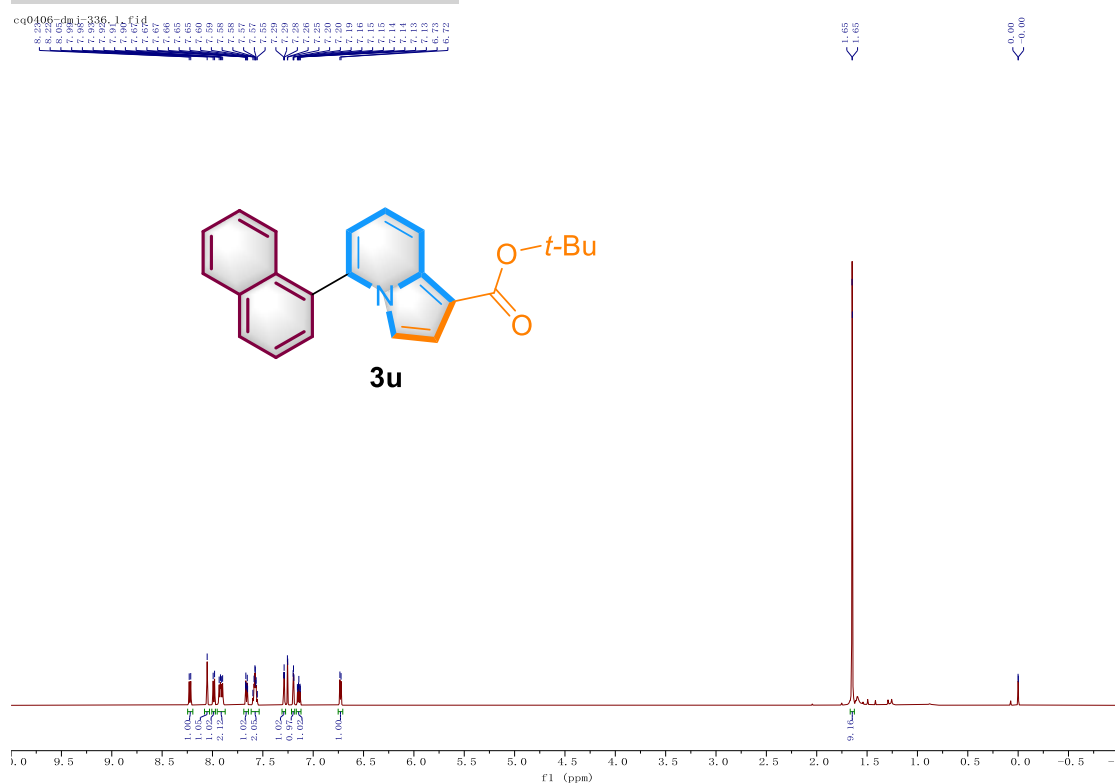

151 MHz  $^{13}\text{C}$  NMR of **3u** in  $\text{CDCl}_3$

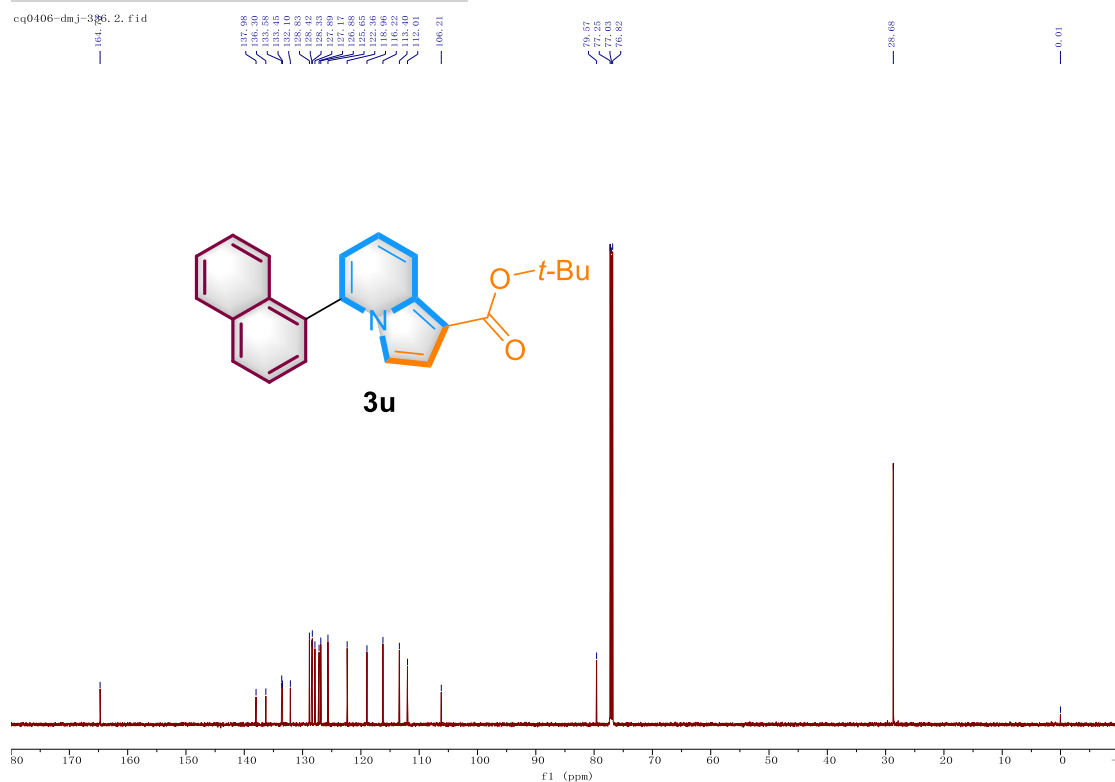

600 MHz  $^1\text{H}$  NMR of **3v** in  $\text{CDCl}_3$

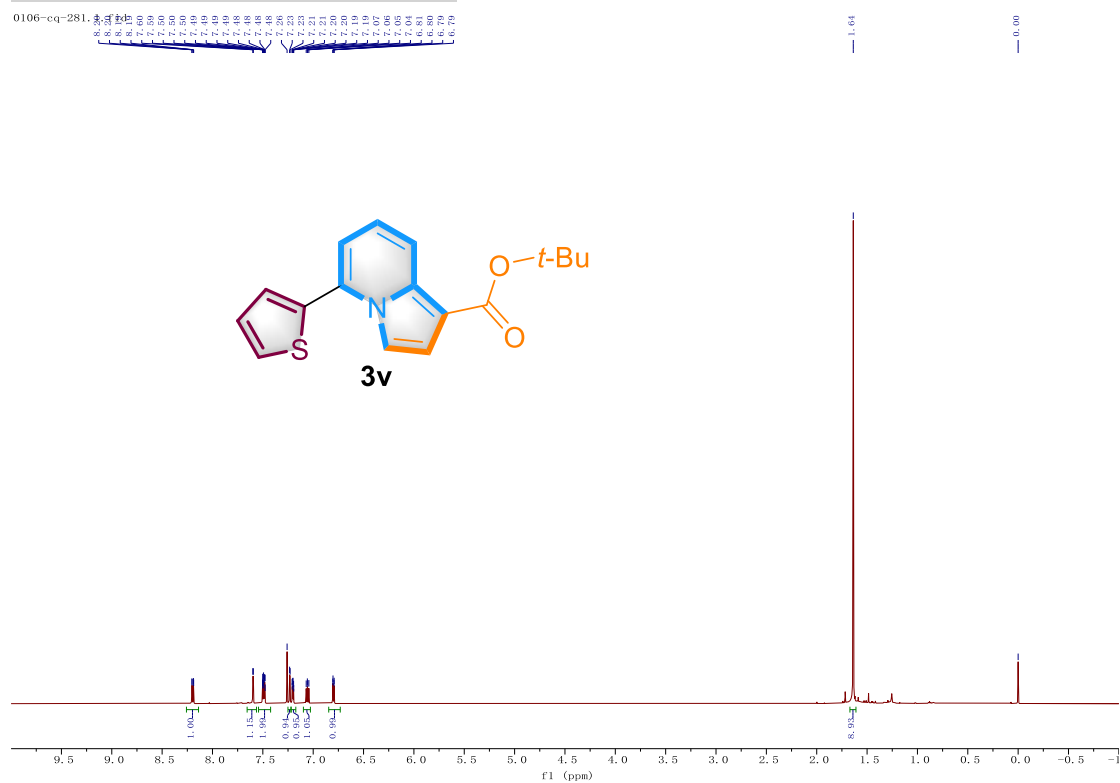

151 MHz  $^{13}\text{C}$  NMR of **3v** in  $\text{CDCl}_3$

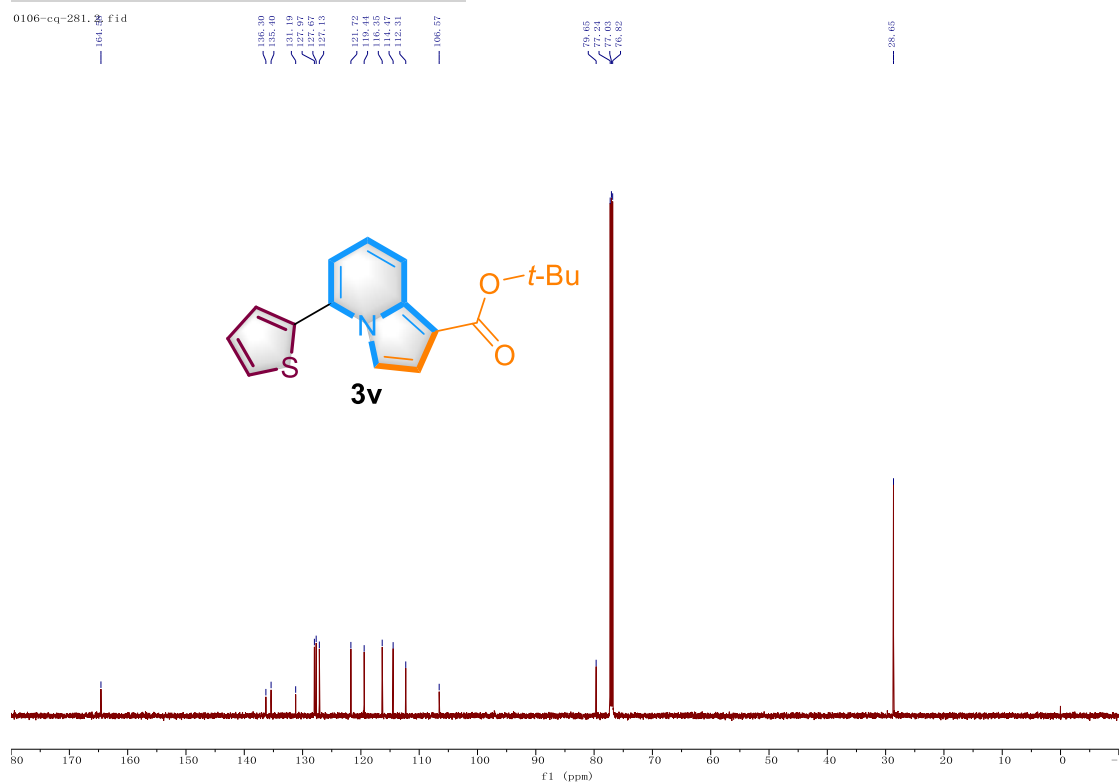

# 600 MHz <sup>1</sup>H NMR of **3w** in CDCl<sub>3</sub>

cq0406-dmj-347.1.fid

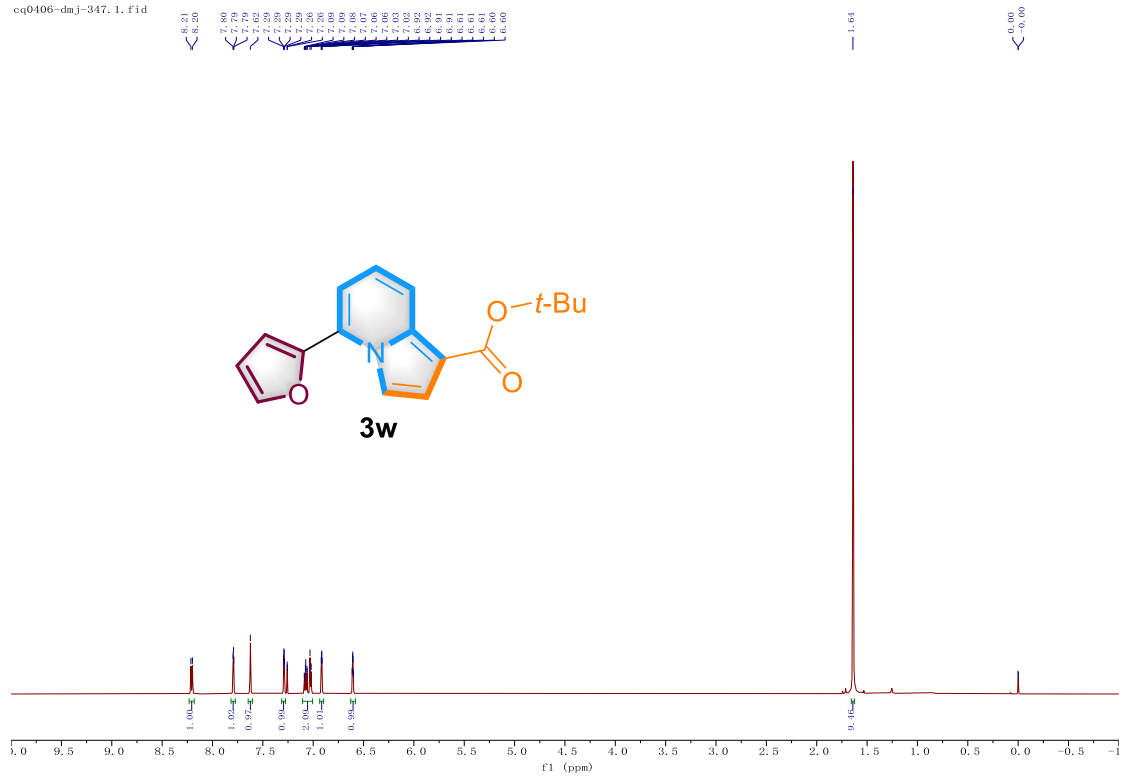

# 151 MHz <sup>13</sup>C NMR of **3w** in CDCl<sub>3</sub>

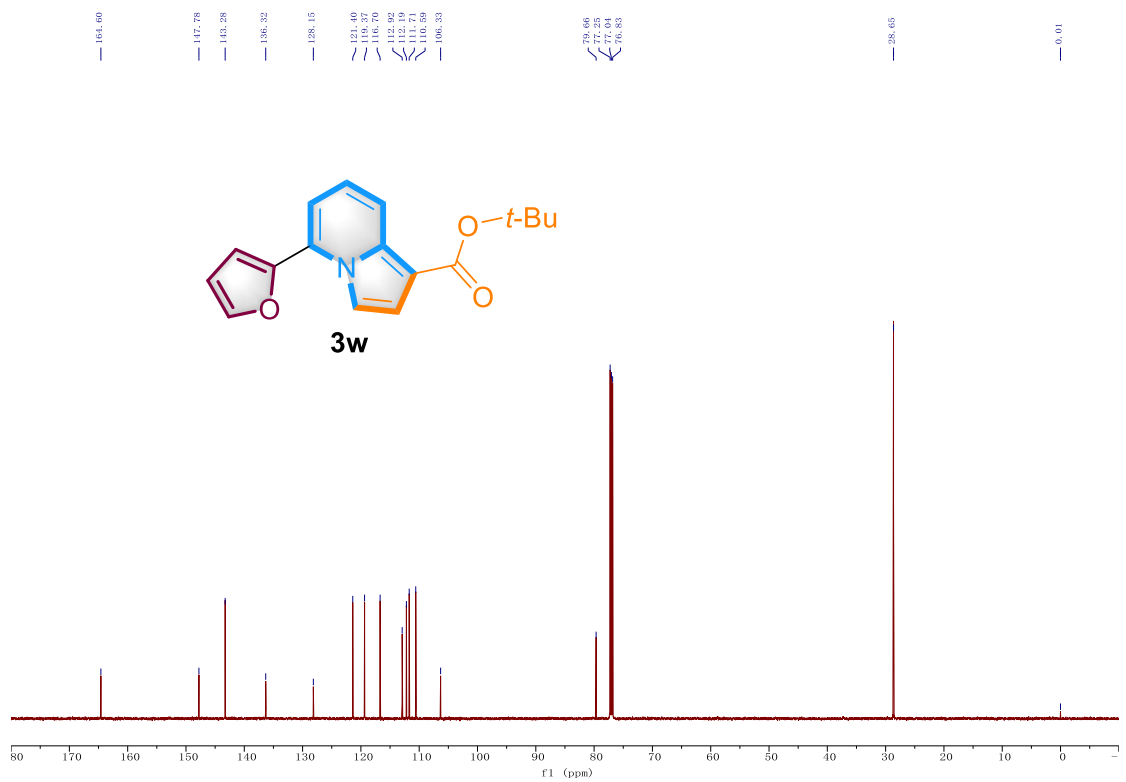

### 600 MHz $^1\text{H}$ NMR of **3ba** in $\text{CDCl}_3$

0106-cq-269.1.fid

8.17  
7.41  
7.41  
7.41  
7.40  
7.39  
7.39  
7.31  
7.31  
7.08  
7.08  
7.07  
7.00  
6.95  
6.94

3.89  
3.72

1.63

0.00

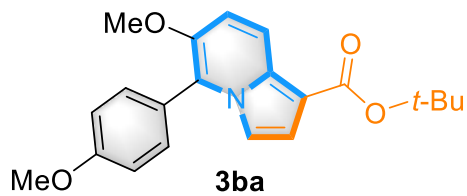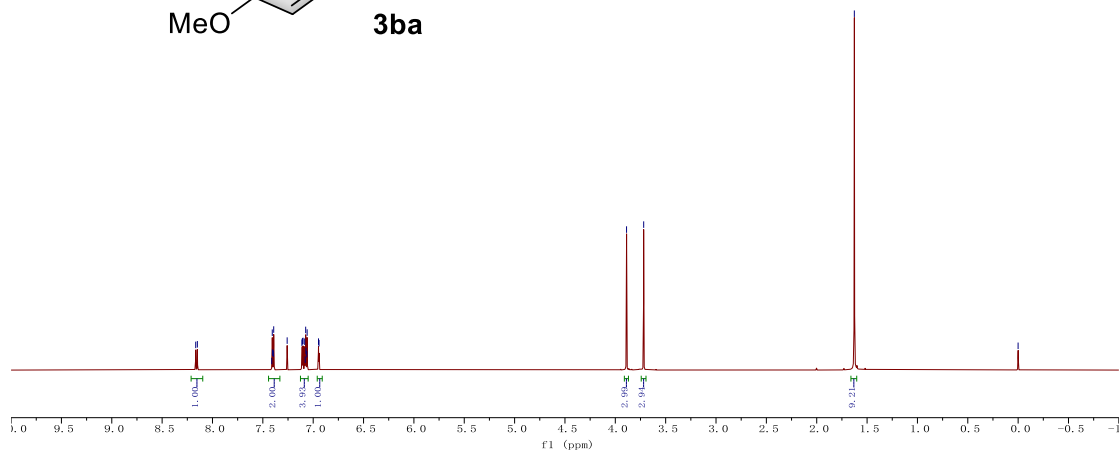

### 151 MHz $^{13}\text{C}$ NMR of **3ba** in $\text{CDCl}_3$

0106-cq-269.1.fid

164.38  
160.38

145.14

135.25  
134.23

126.16

122.96

119.11  
114.86  
114.62  
112.25

105.72

78.40  
77.04  
76.83

58.73  
55.35

28.67

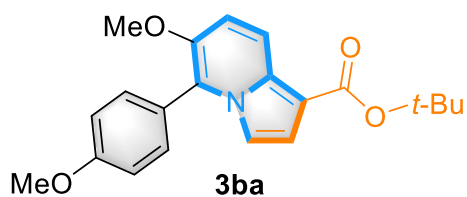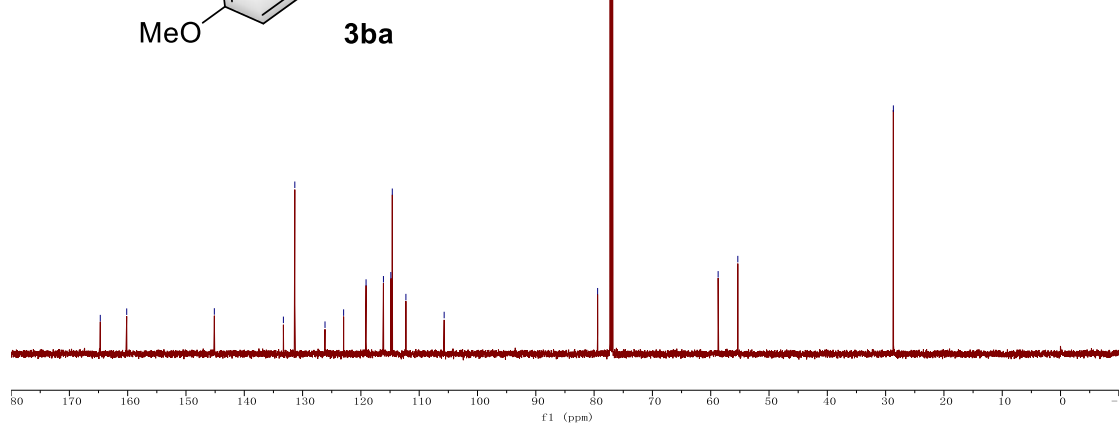



### 600 MHz <sup>1</sup>H NMR of **3ca** in CDCl<sub>3</sub>

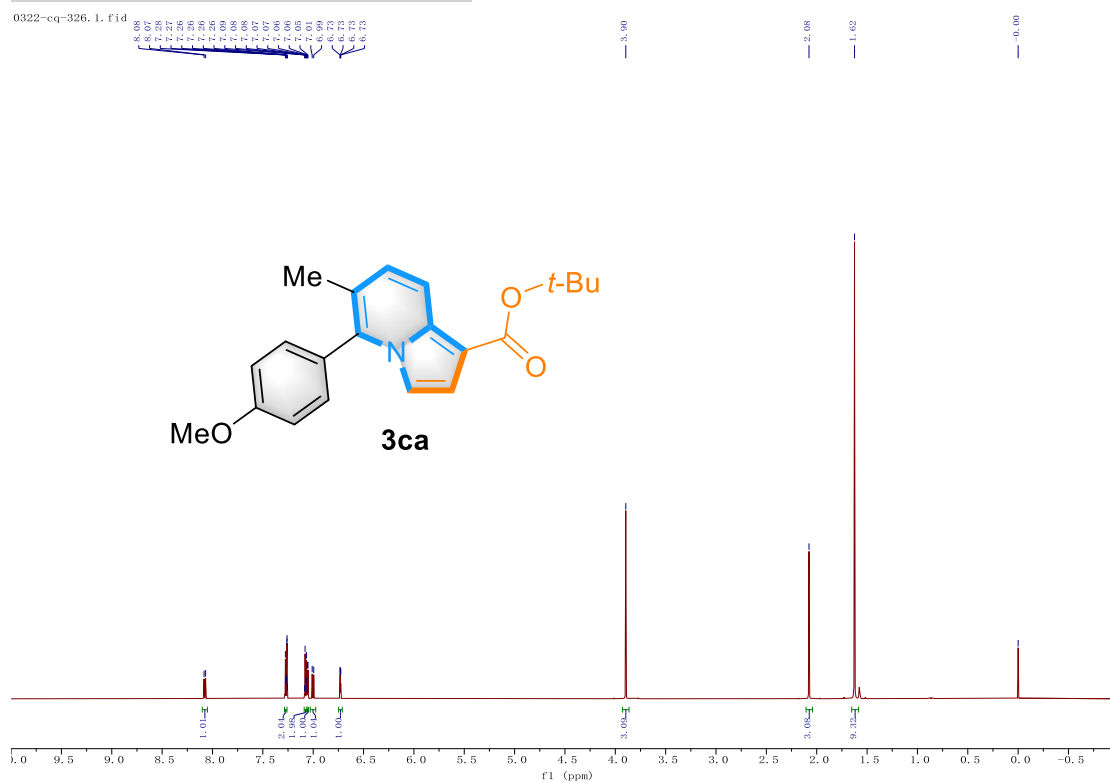

### 151 MHz <sup>13</sup>C NMR of **3ca** in CDCl<sub>3</sub>

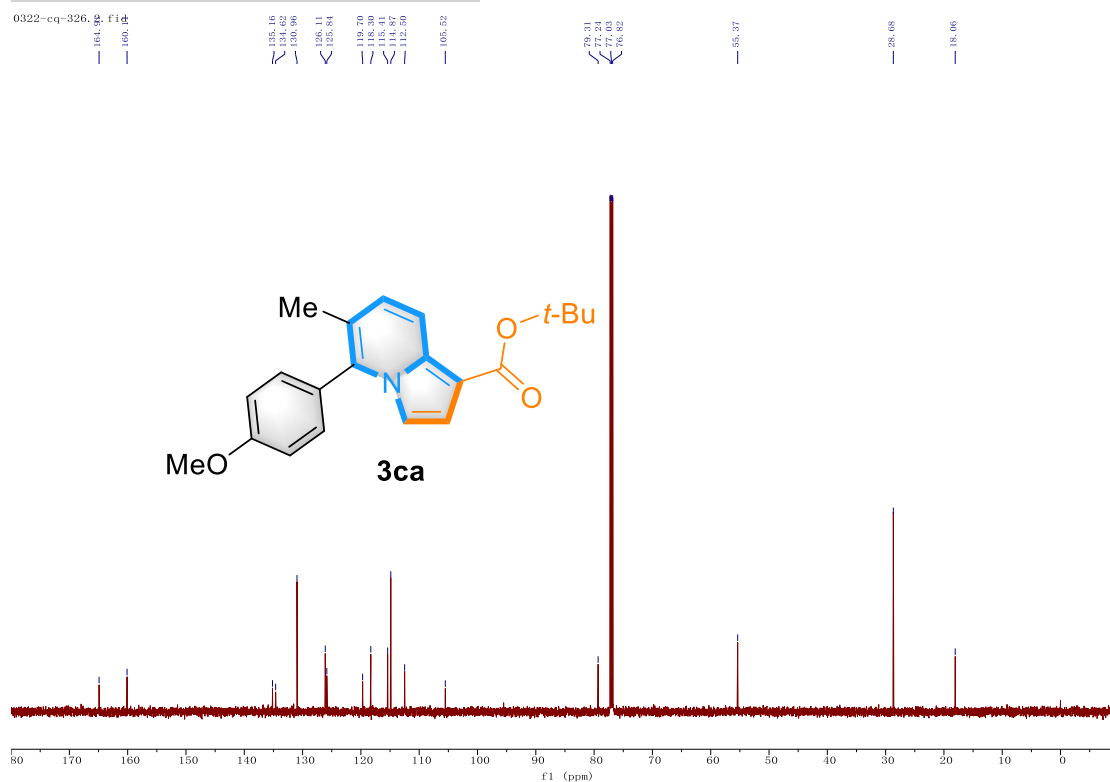

600 MHz <sup>1</sup>H NMR of **3da** in CDCl<sub>3</sub>

0322-eq-314.1.fid

8.09  
7.96  
7.86  
7.85  
7.85  
7.28  
7.28  
7.23  
7.23  
7.20  
7.20  
7.05  
7.05  
7.00  
7.00  
6.74  
6.74  
6.74

2.08

1.63

1.40

0.07

-0.00

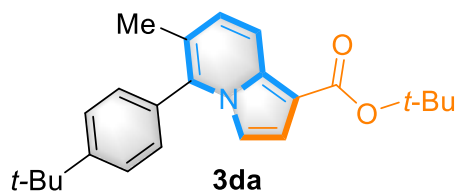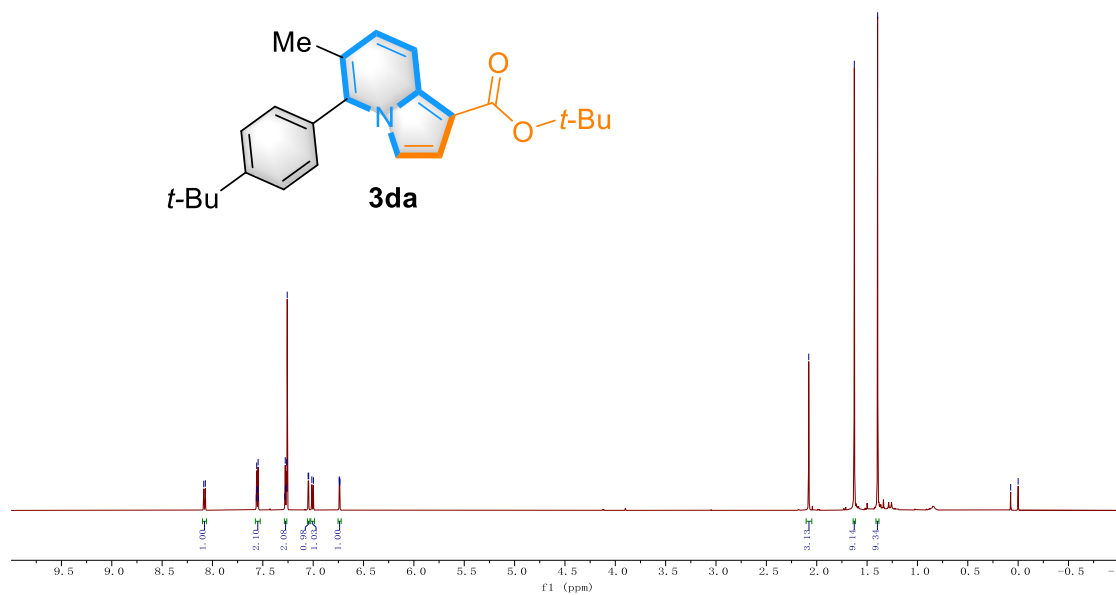

151 MHz <sup>13</sup>C NMR of **3da** in CDCl<sub>3</sub>

0322-eq-314.fid

164.89

152.28

135.33

134.92

130.64

128.25

126.32

124.14

118.52

116.99

115.37

112.67

108.46

79.31

77.04

76.82

34.86

31.34

28.69

18.09

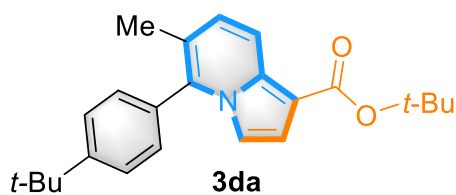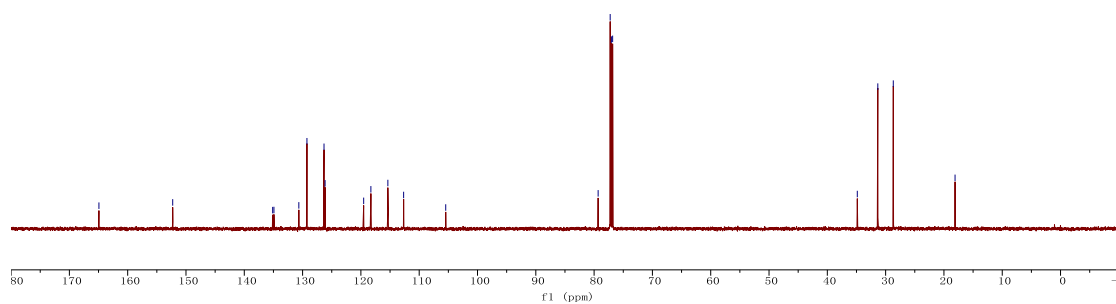

600 MHz  $^1\text{H}$  NMR of **3ea** in  $\text{CDCl}_3$

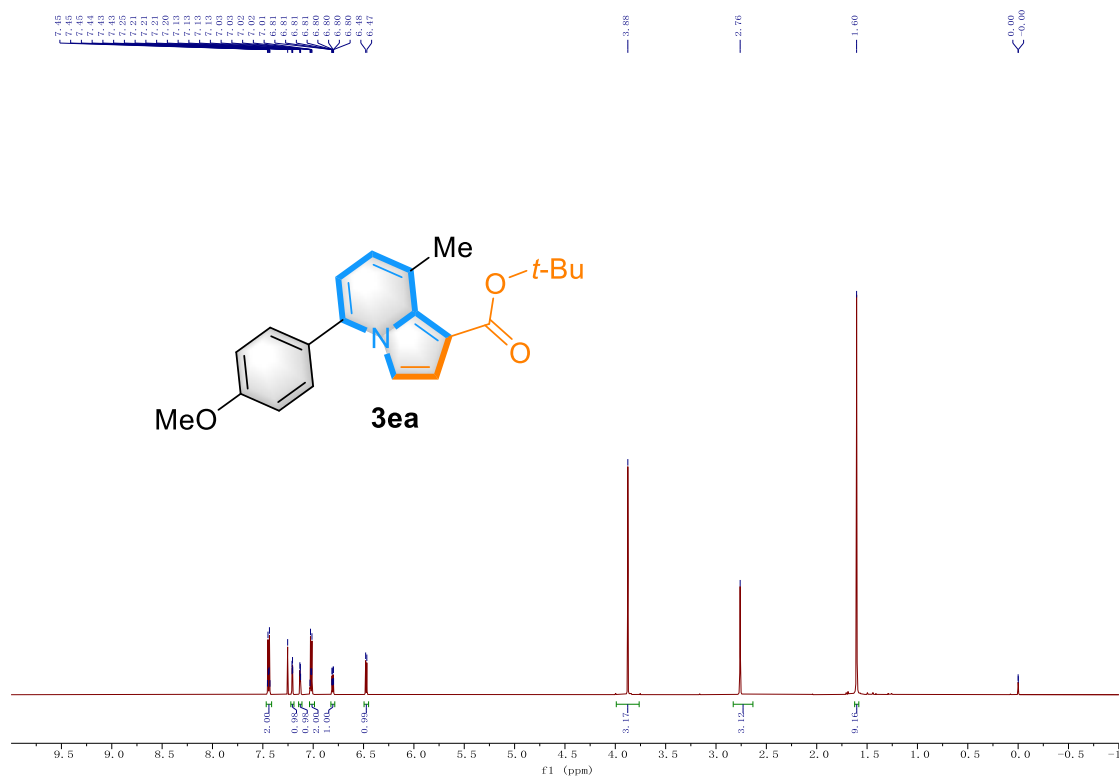

151 MHz  $^{13}\text{C}$  NMR of **3ea** in  $\text{CDCl}_3$

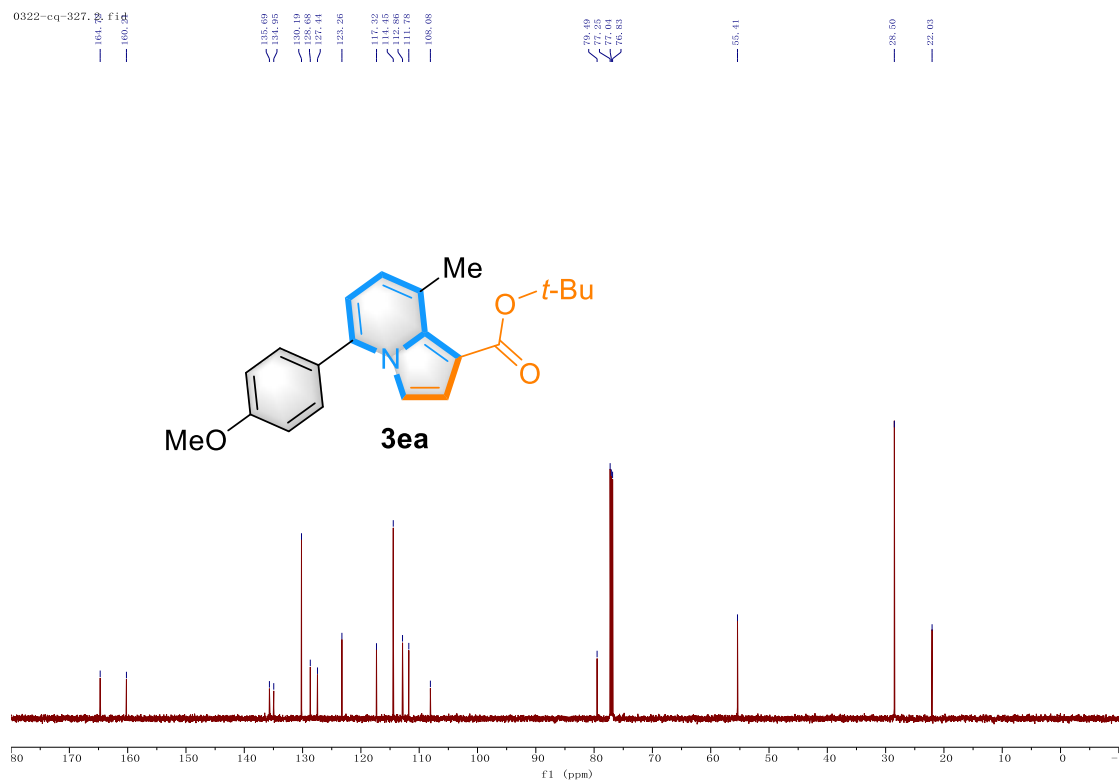

### 600 MHz $^1\text{H}$ NMR of **3fa** in $\text{CDCl}_3$

0423eq-dmj333.1.fid

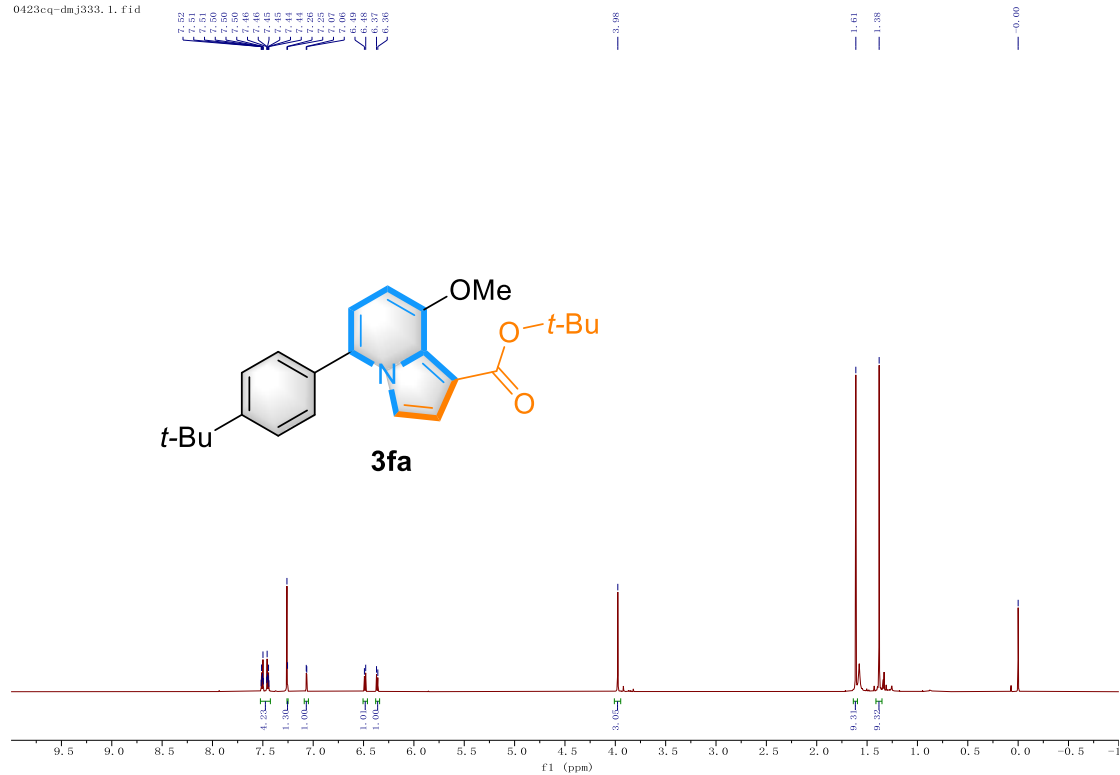

### 151 MHz $^{13}\text{C}$ NMR of **3fa** in $\text{CDCl}_3$

0423eq-dmj333.3.fid

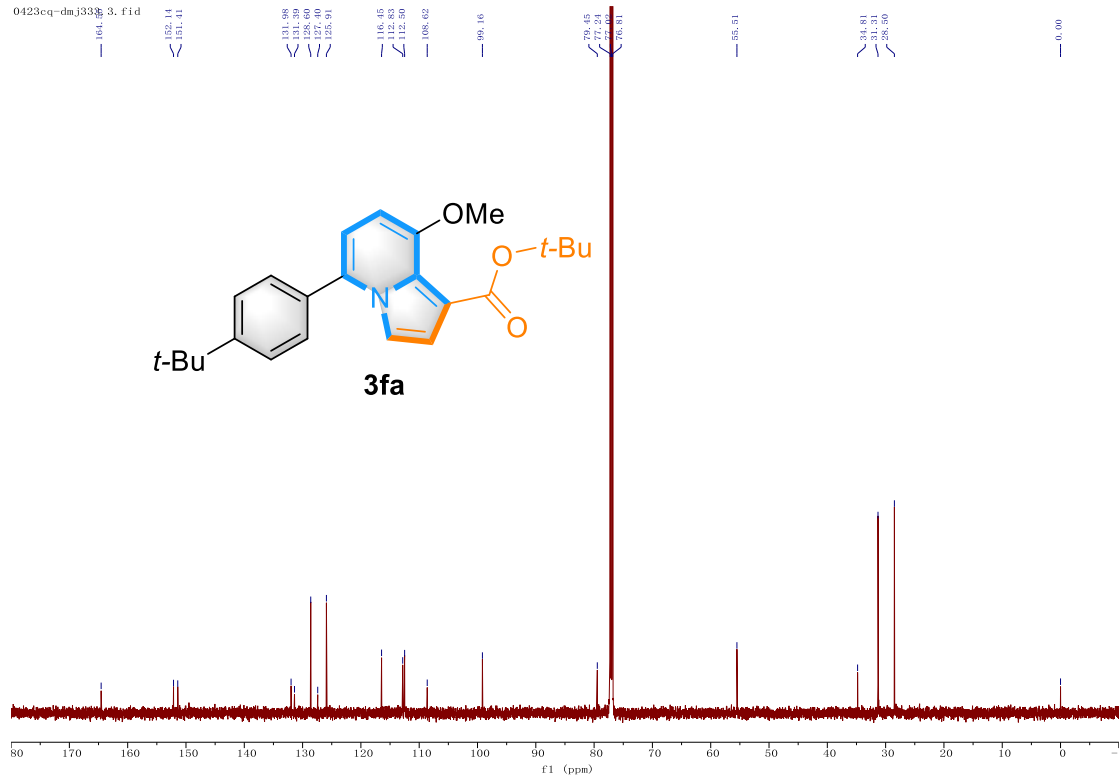

600 MHz  $^1\text{H}$  NMR of **3ab** in  $\text{CDCl}_3$

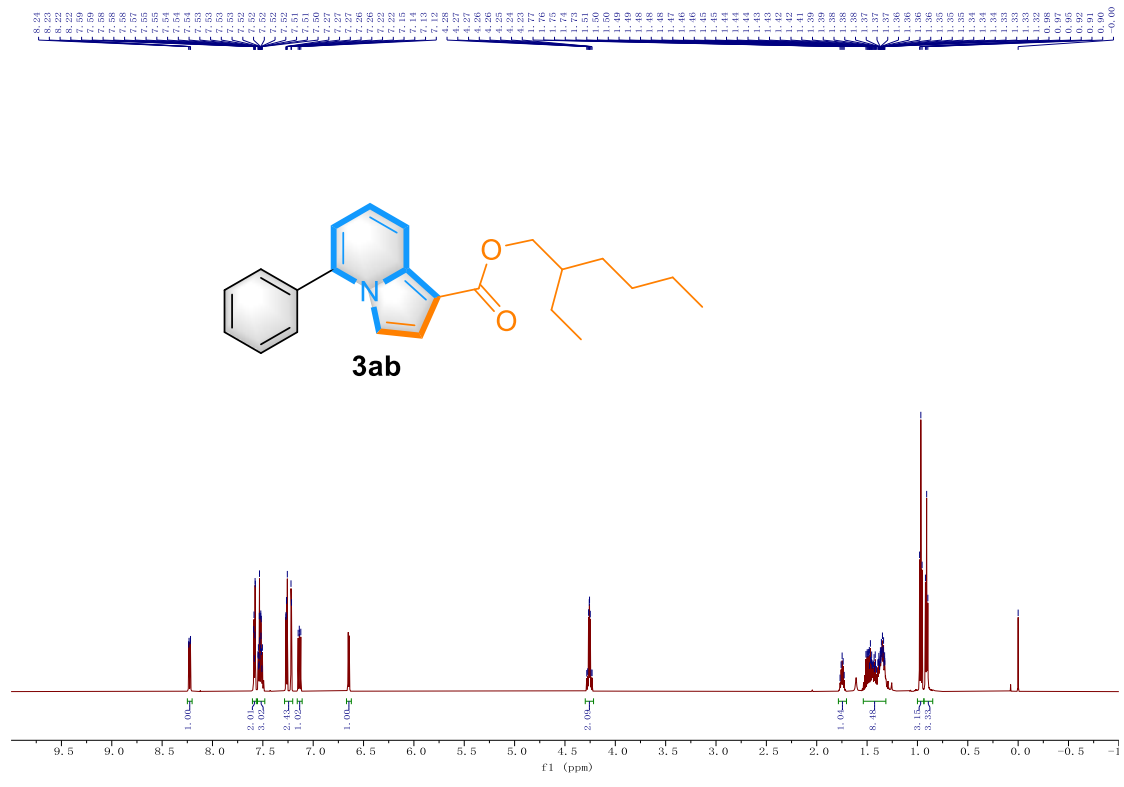

151 MHz  $^{13}\text{C}$  NMR of **3ab** in  $\text{CDCl}_3$

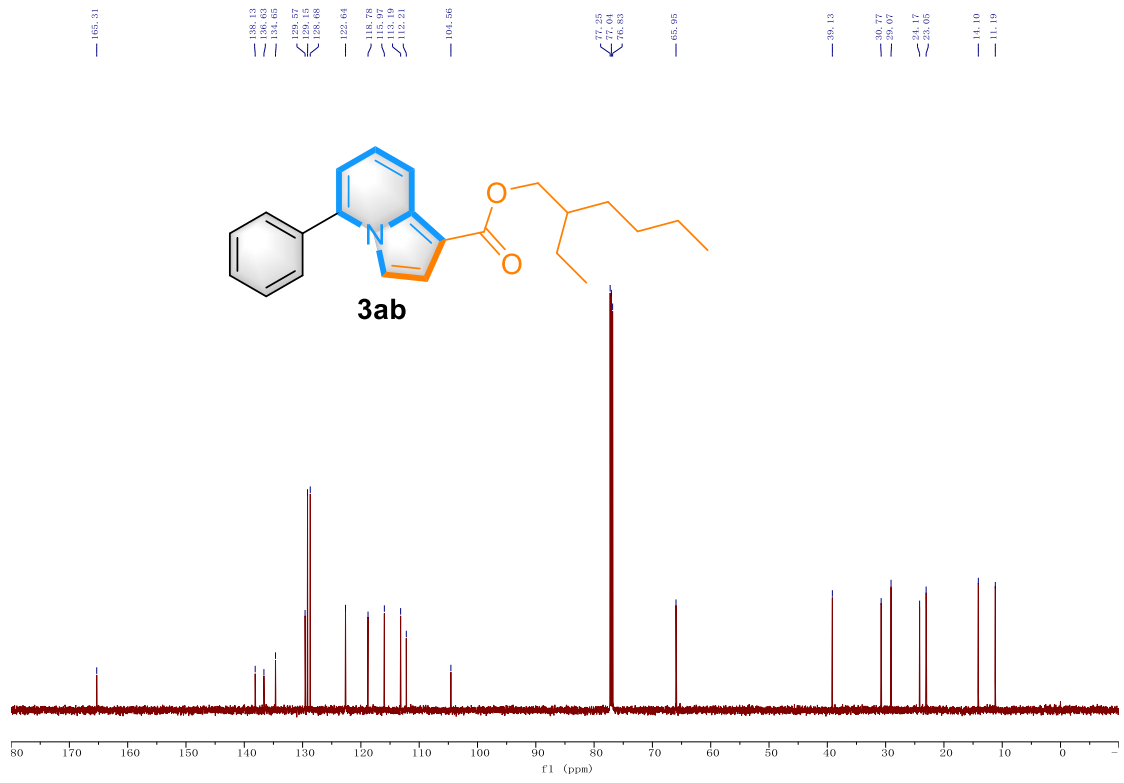

# 600 MHz <sup>1</sup>H NMR of 3ac in CDCl<sub>3</sub>

cq0406-dmj-312.1.fid

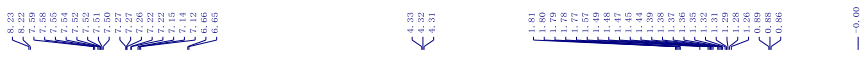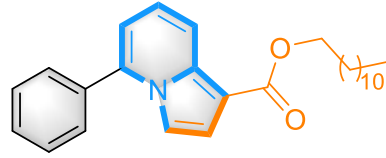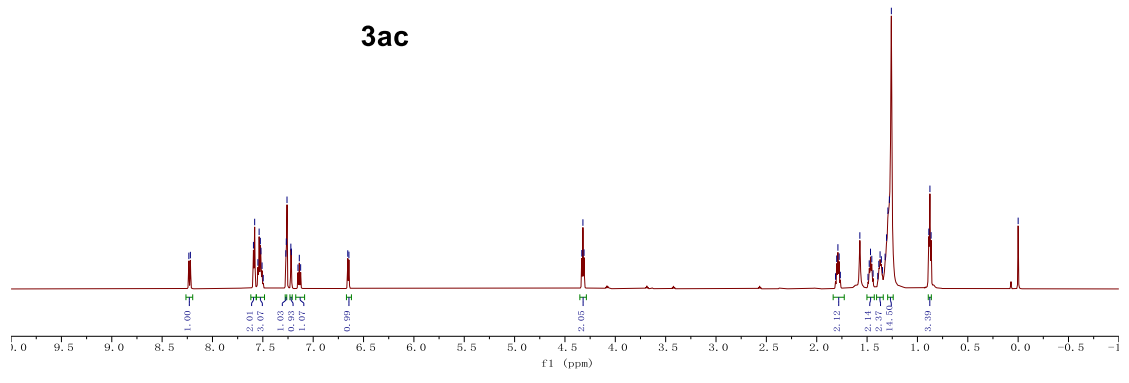

# 151 MHz <sup>13</sup>C NMR of 3ac in CDCl<sub>3</sub>

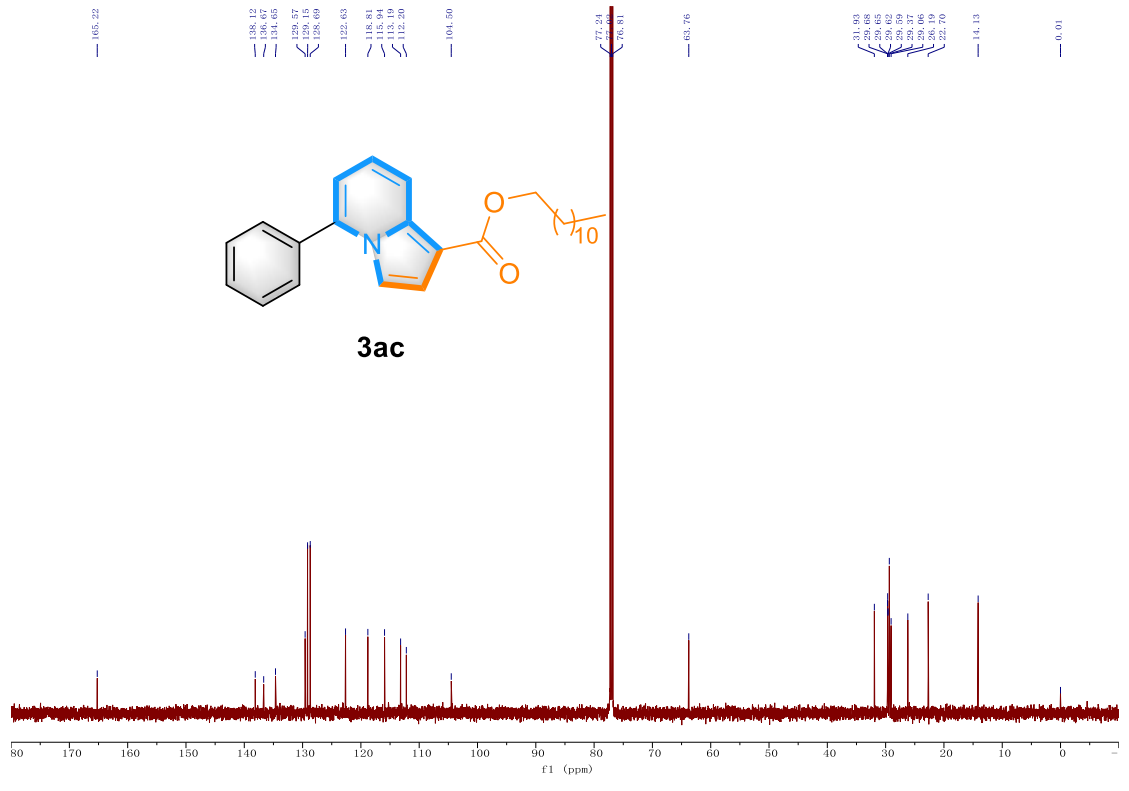



# 600 MHz <sup>1</sup>H NMR of 3ae in CDCl<sub>3</sub>

0106-cq-274.1.fid

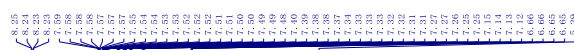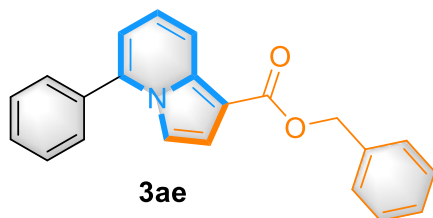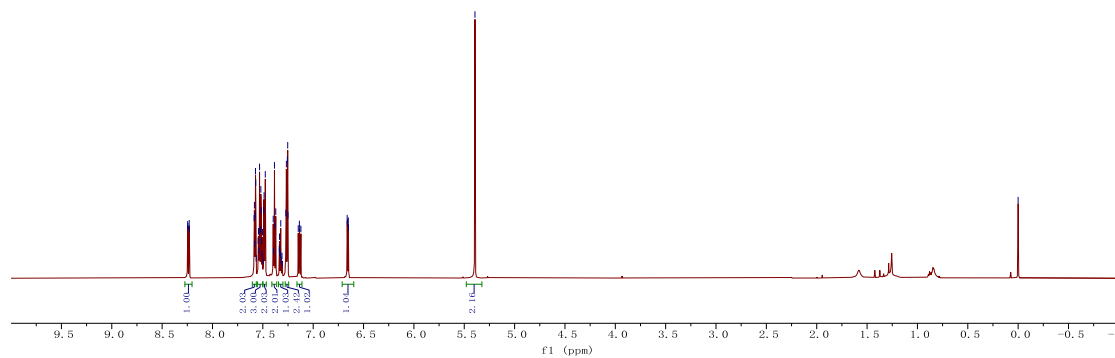

# 151 MHz <sup>13</sup>C NMR of 3ae in CDCl<sub>3</sub>

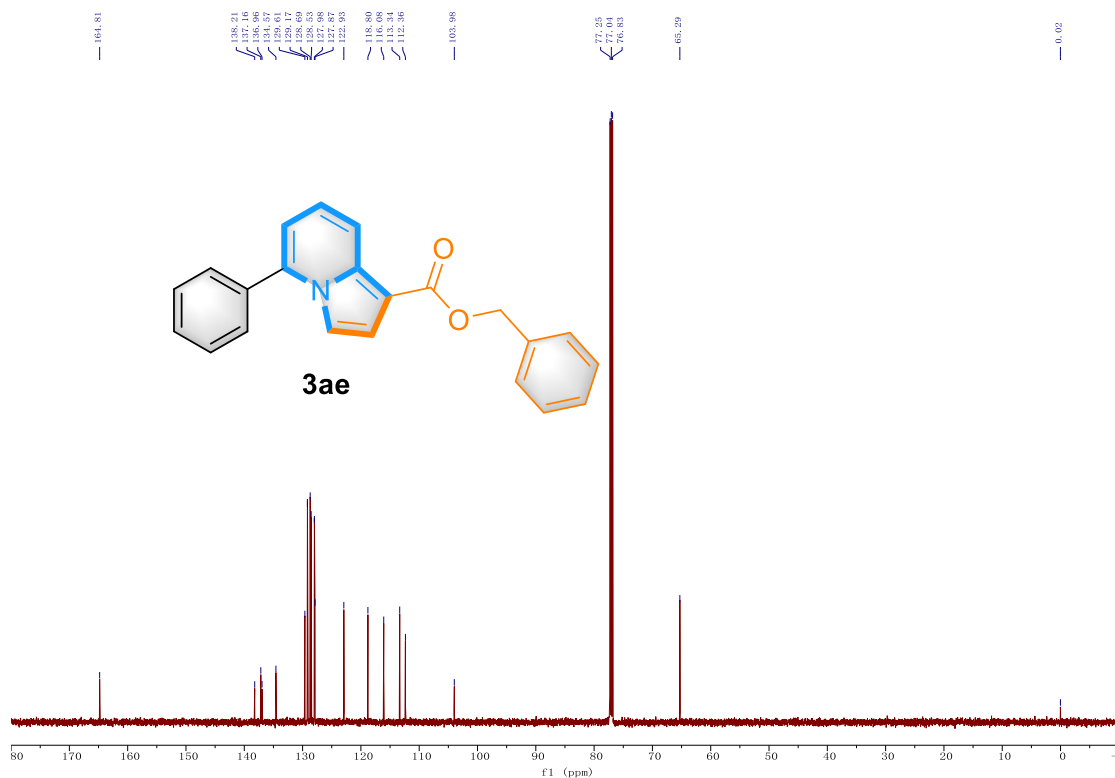



600 MHz  $^1\text{H}$  NMR of **3af** in  $\text{CDCl}_3$

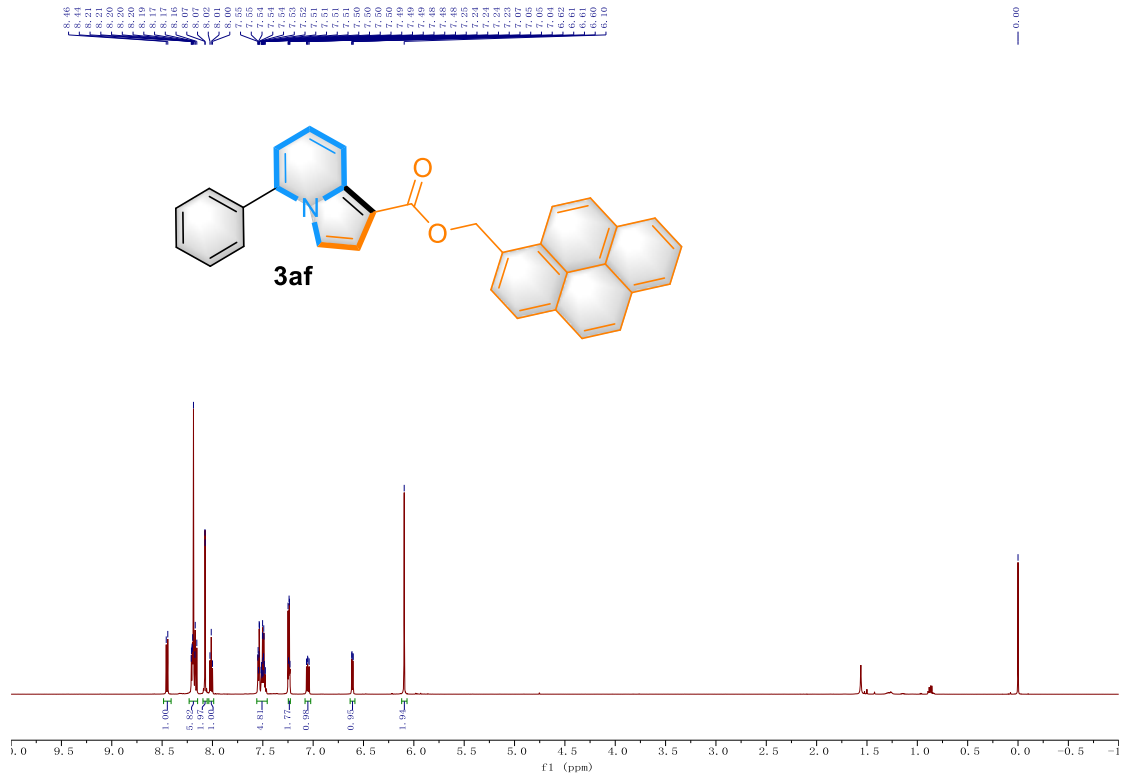

151 MHz  $^{13}\text{C}$  NMR of **3af** in  $\text{CDCl}_3$

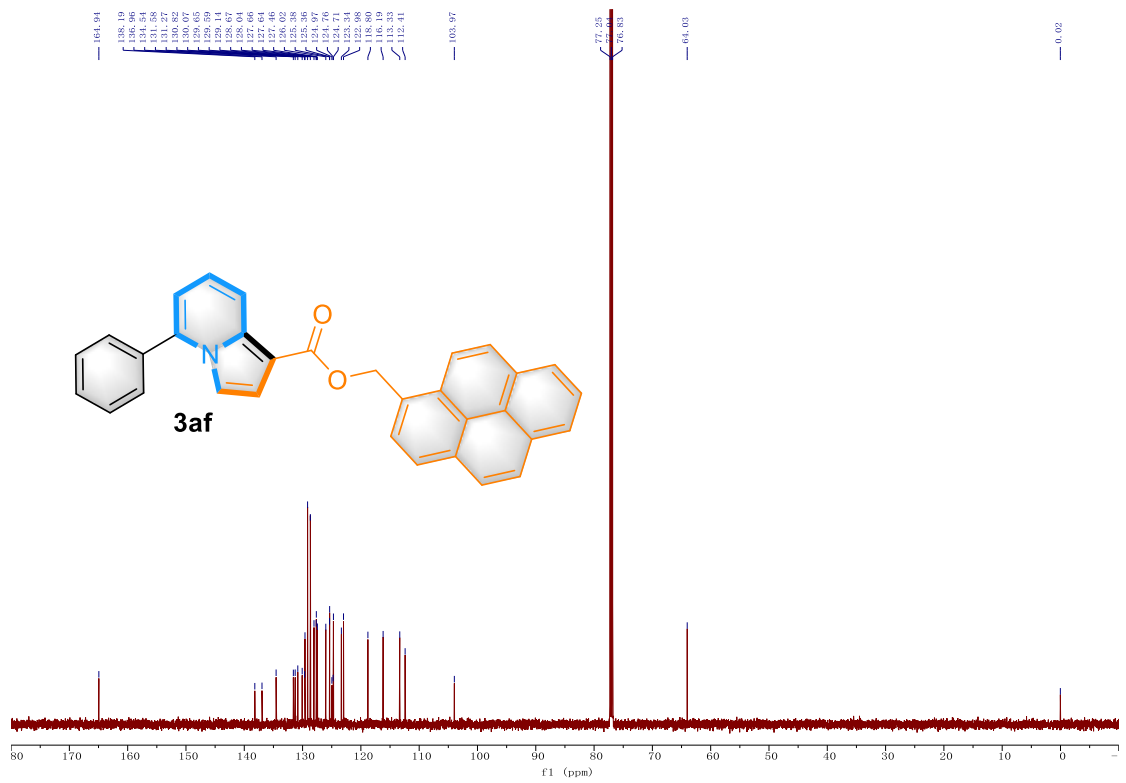

# 600 MHz $^1\text{H}$ NMR of **3ag** in $\text{CDCl}_3$

cq-0113-dmj-282.1.fid

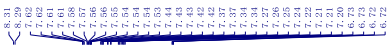

1.85

0.00

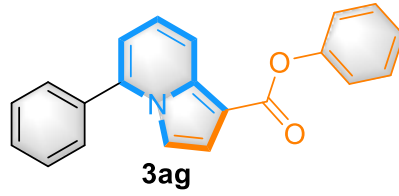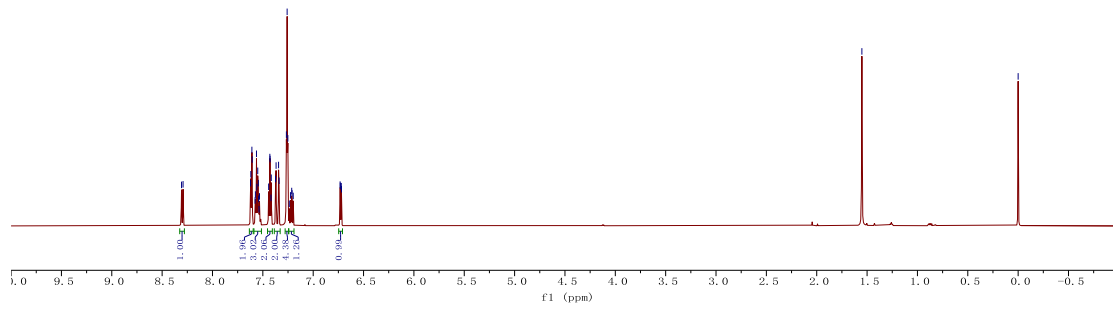

# 151 MHz $^{13}\text{C}$ NMR of **3ag** in $\text{CDCl}_3$

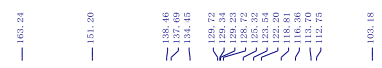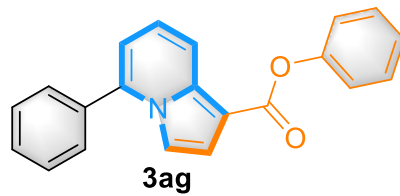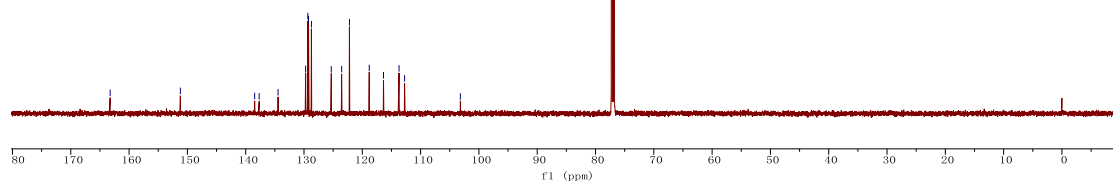

### 600 MHz $^1\text{H}$ NMR of **3ah** in $\text{CDCl}_3$

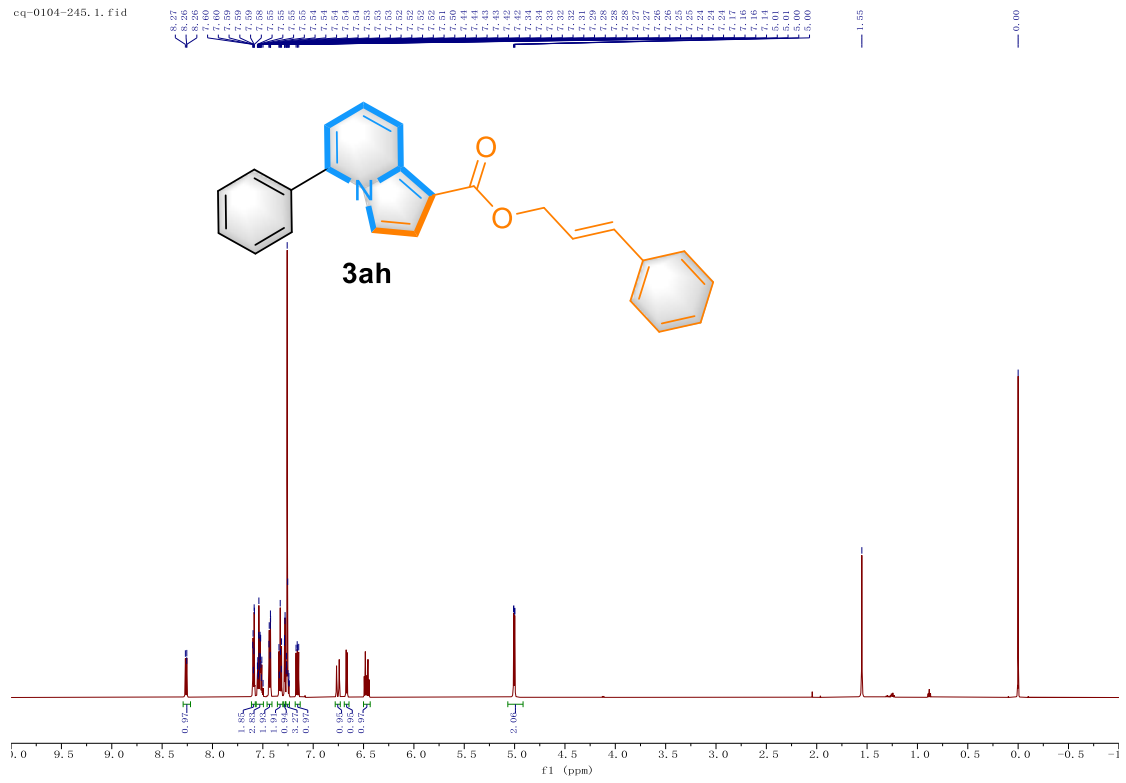

### 151 MHz $^{13}\text{C}$ NMR of **3ah** in $\text{CDCl}_3$

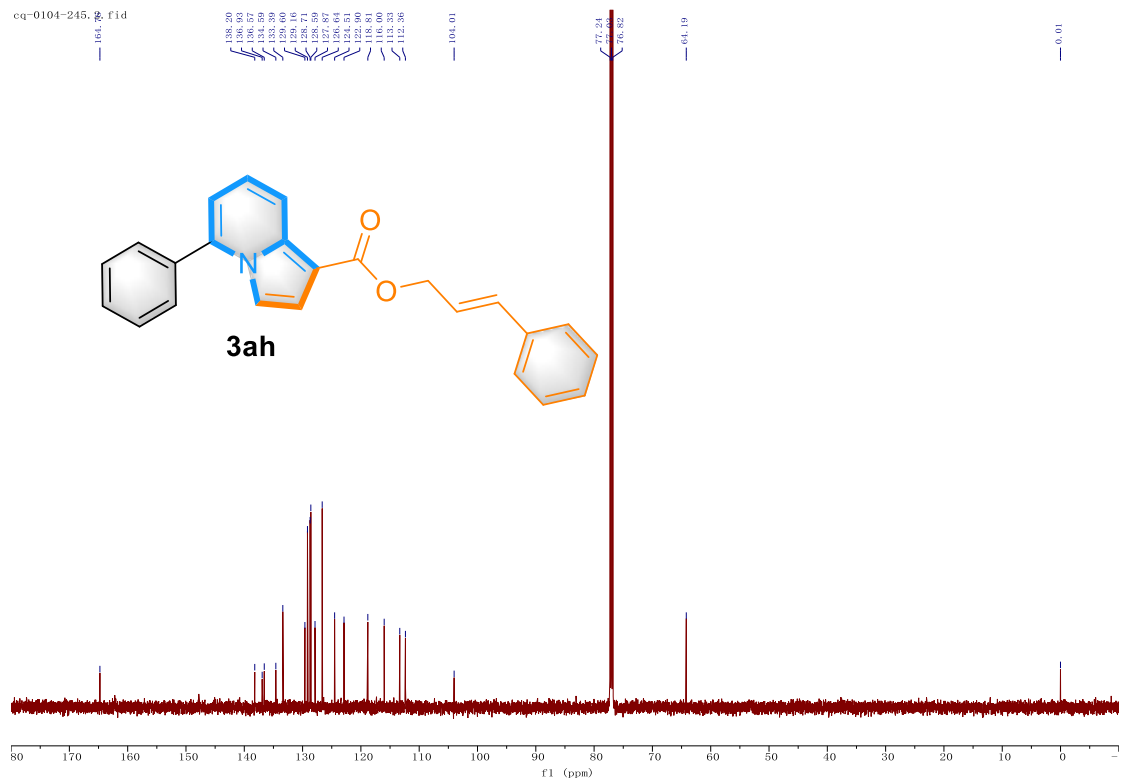

### 600 MHz $^1\text{H}$ NMR of **3ai** in $\text{CDCl}_3$

0106-cq-242.1.fid

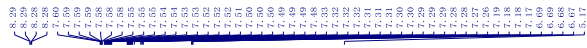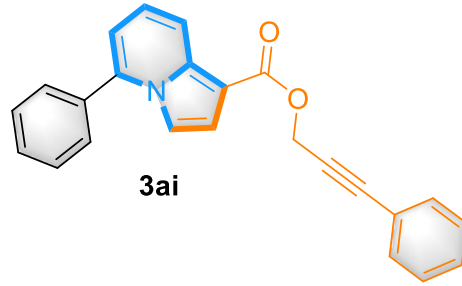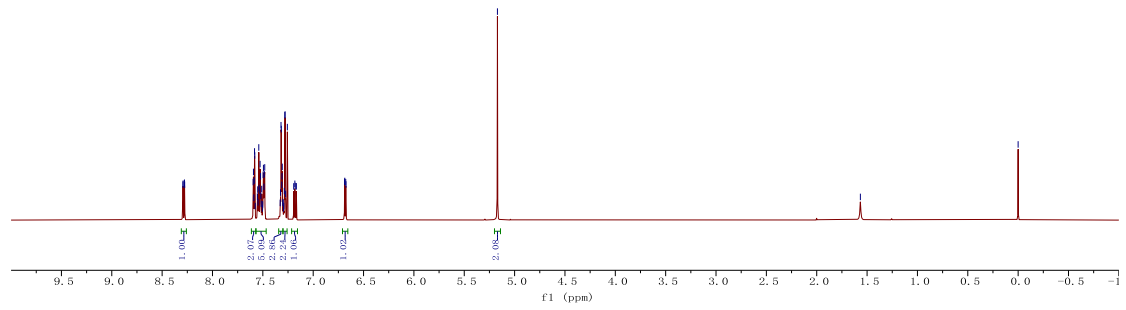

### 151 MHz $^{13}\text{C}$ NMR of **3ai** in $\text{CDCl}_3$

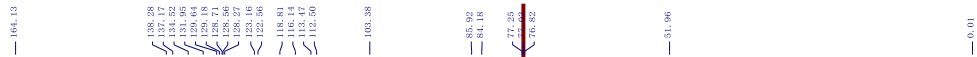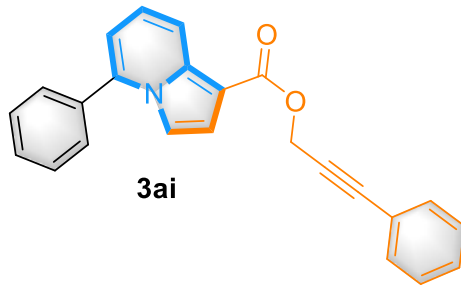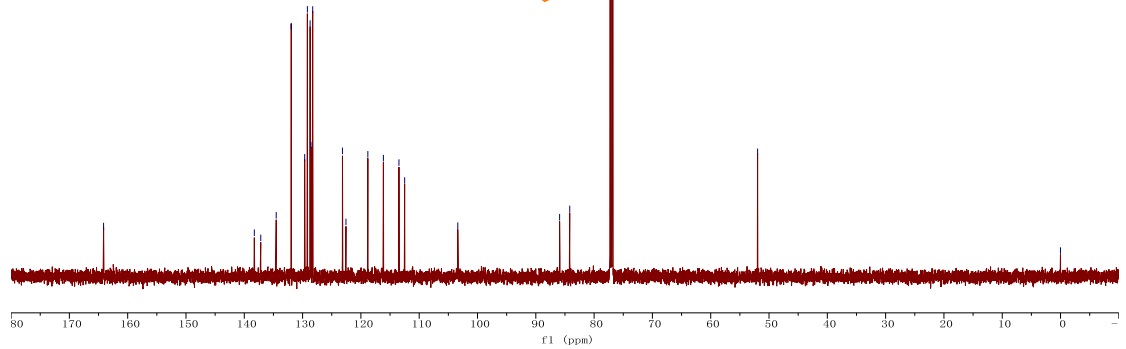

### 600 MHz $^1\text{H}$ NMR of **3aj** in $\text{CDCl}_3$

cq0604-625.1.fid

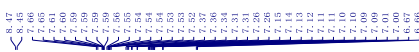

1.00

0.00  
-0.00

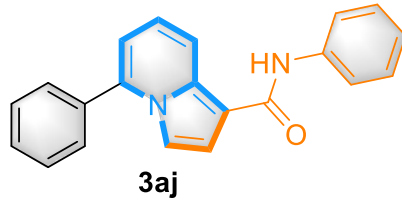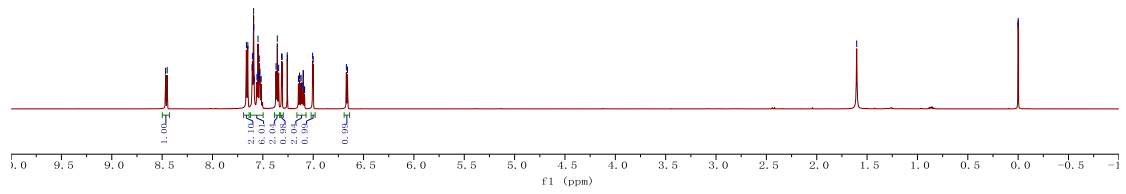

### 151 MHz $^{13}\text{C}$ NMR of **3aj** in $\text{CDCl}_3$

165.25

138.69  
137.82  
136.48  
129.59  
129.19  
128.71  
123.59  
119.94  
119.27  
115.47  
111.92  
111.79  
107.14

77.05  
77.04  
76.83

0.02

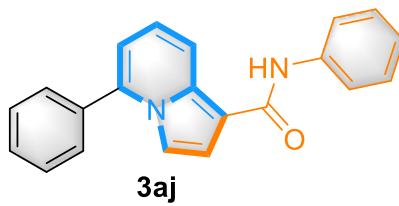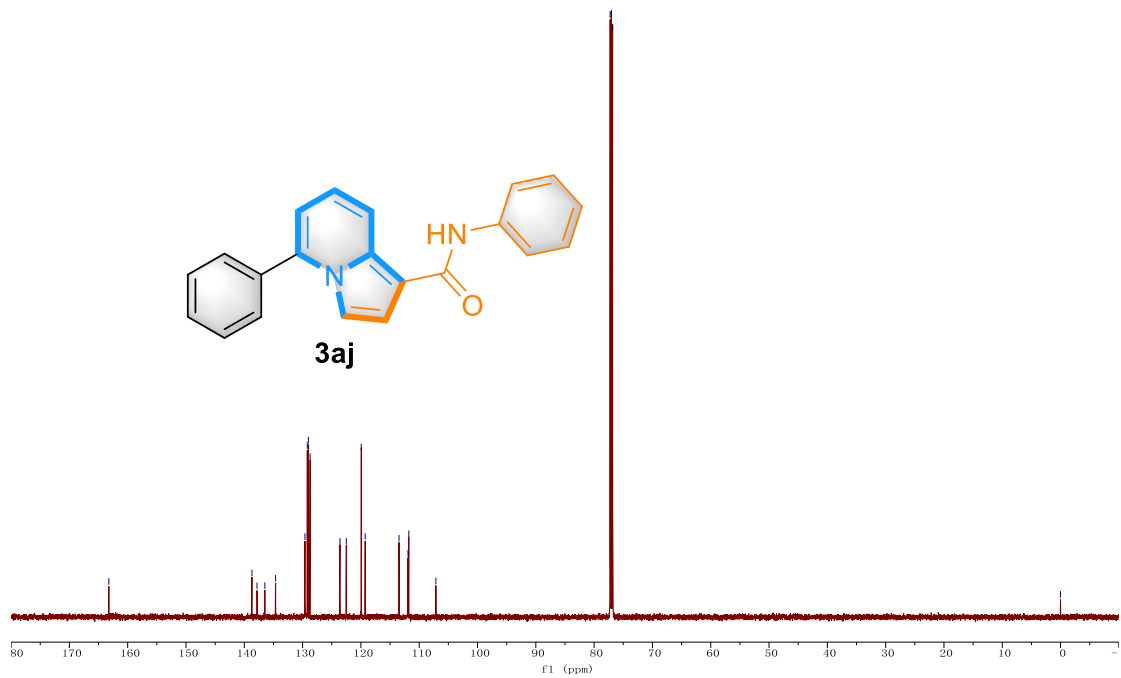



### 600 MHz <sup>1</sup>H NMR of 3al in CDCl<sub>3</sub>

cq1205-dmj584.1.fid

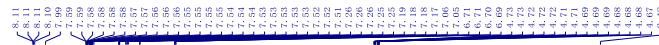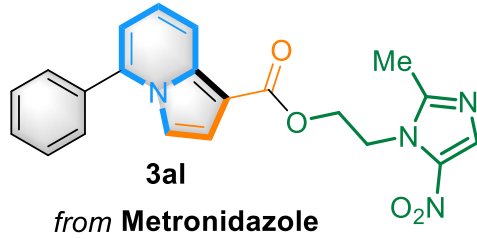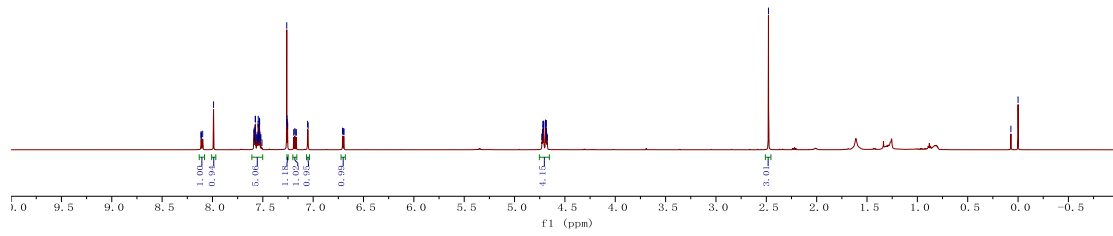

### 151 MHz <sup>13</sup>C NMR of 3al in CDCl<sub>3</sub>

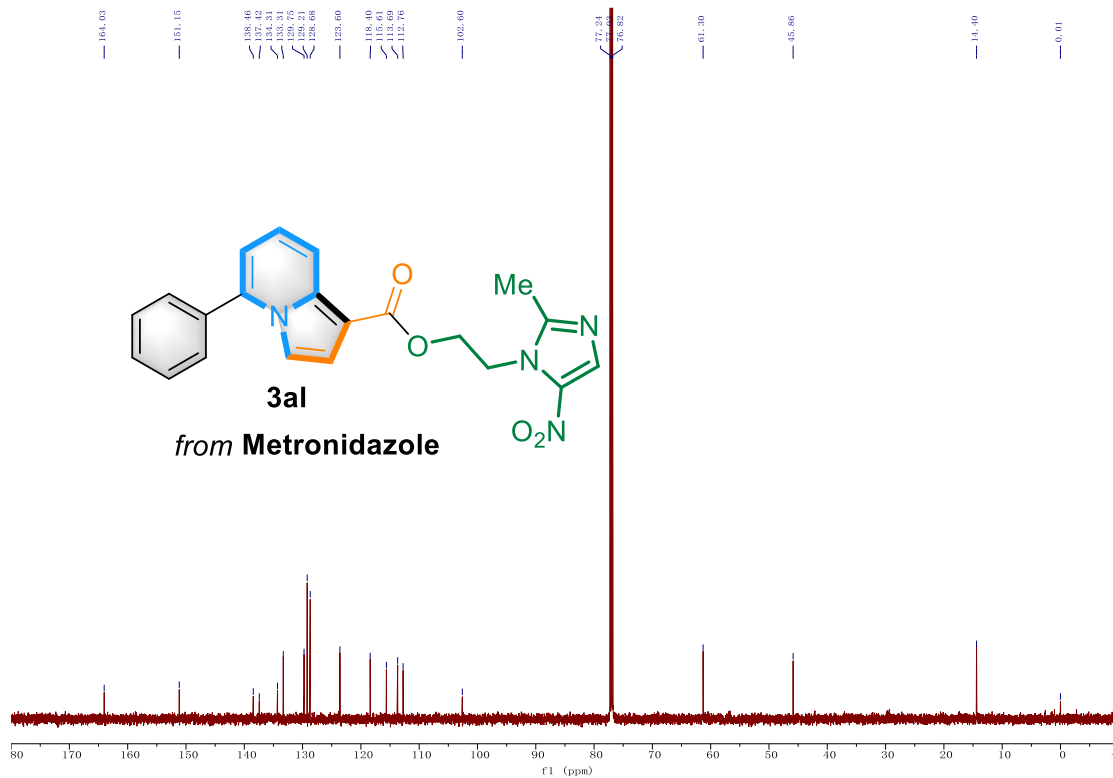





600 MHz  $^1\text{H}$  NMR of **3an** in  $\text{CDCl}_3$

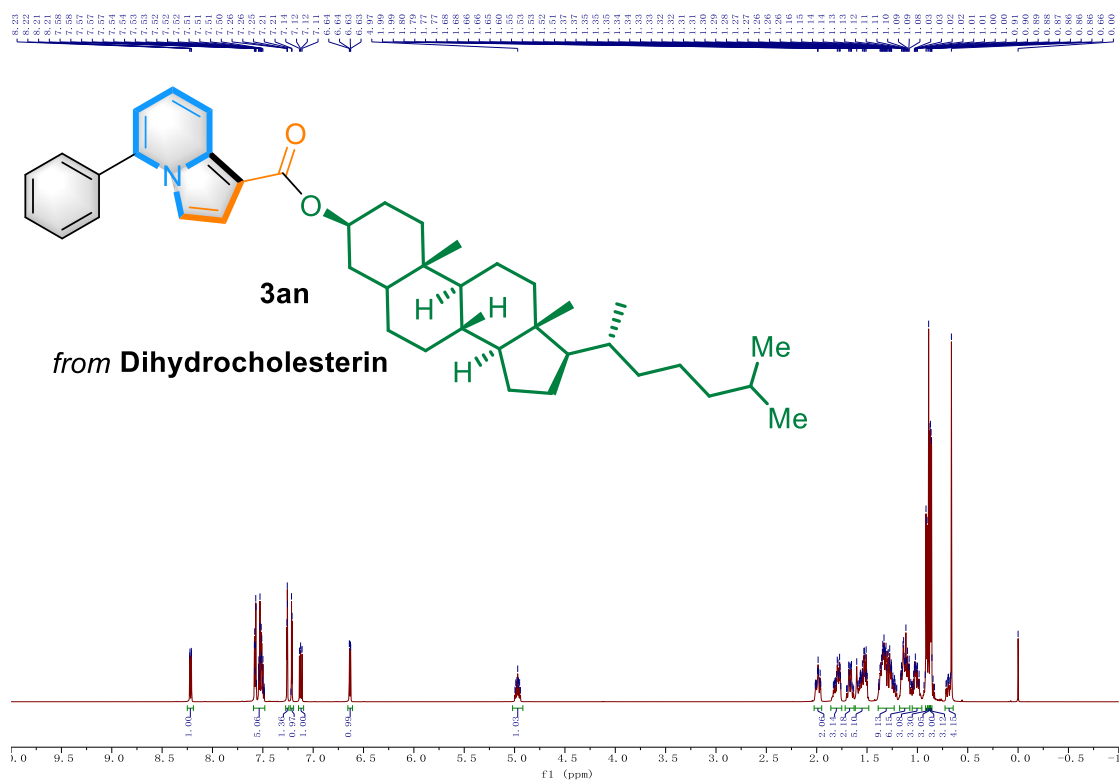

151 MHz  $^{13}\text{C}$  NMR of **3an** in  $\text{CDCl}_3$

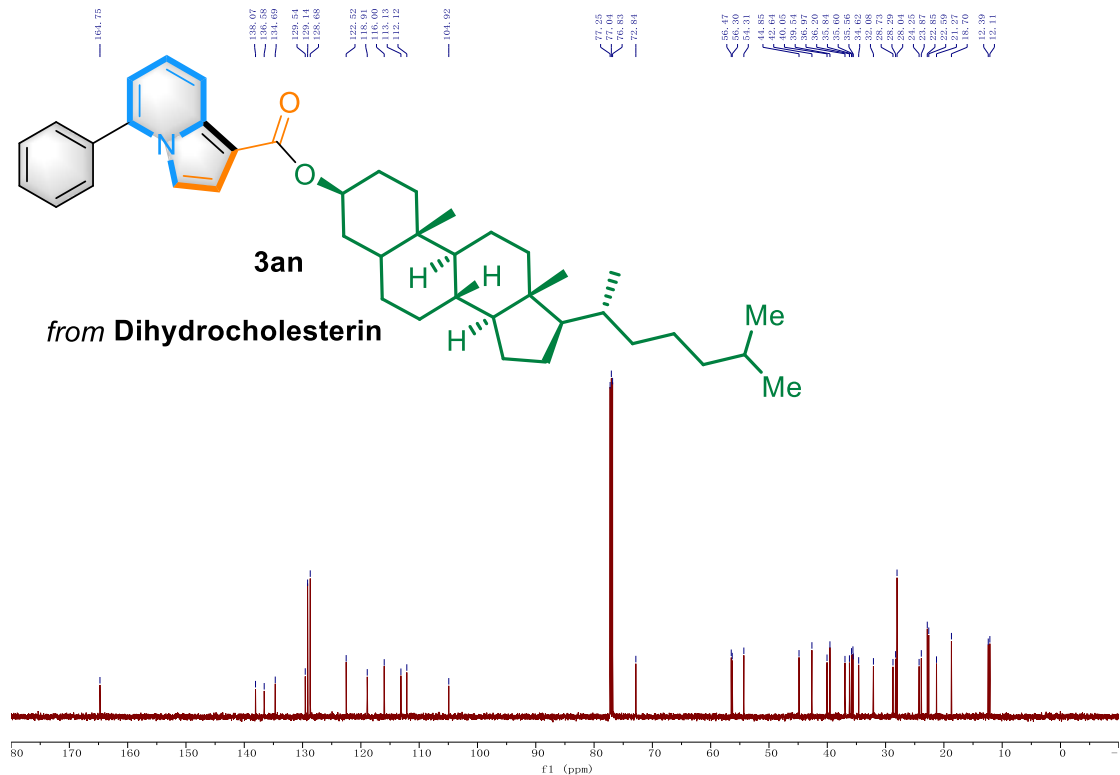

600 MHz  $^1\text{H}$  NMR of **3ao** in  $\text{CDCl}_3$

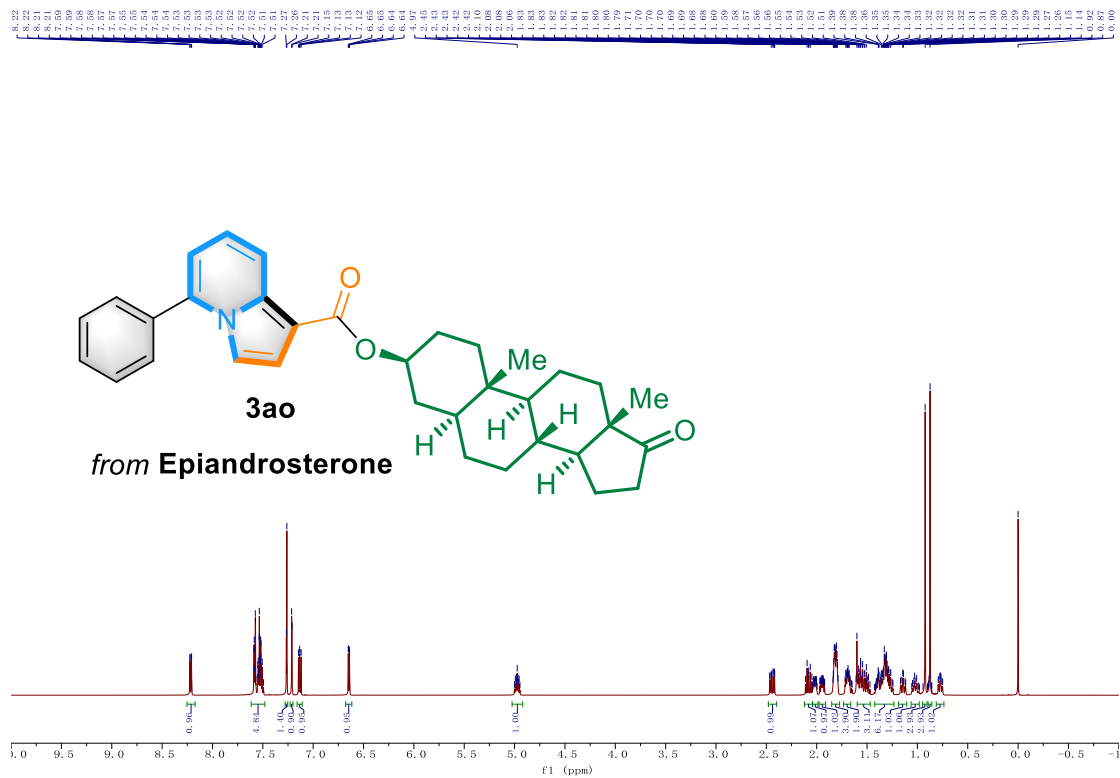

151 MHz  $^{13}\text{C}$  NMR of **3ao** in  $\text{CDCl}_3$

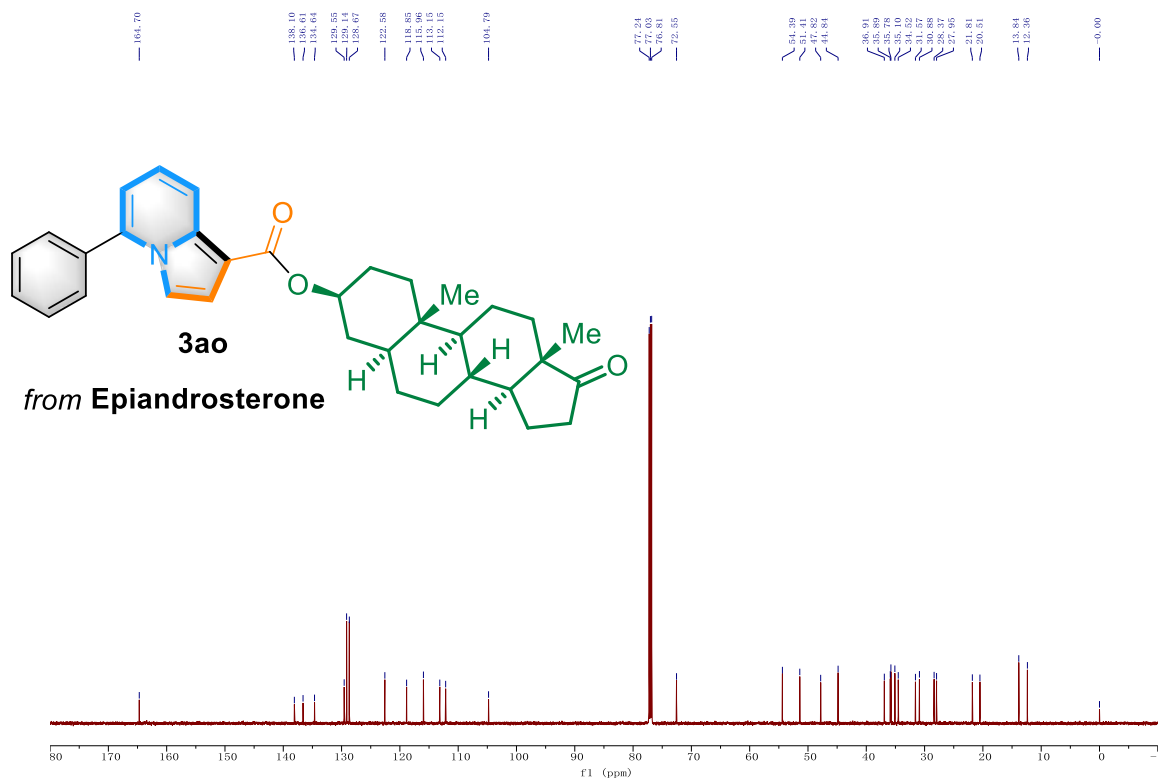

### 600 MHz $^1\text{H}$ NMR of **6** in $\text{CDCl}_3$

eq0423-dmj382.2.fid

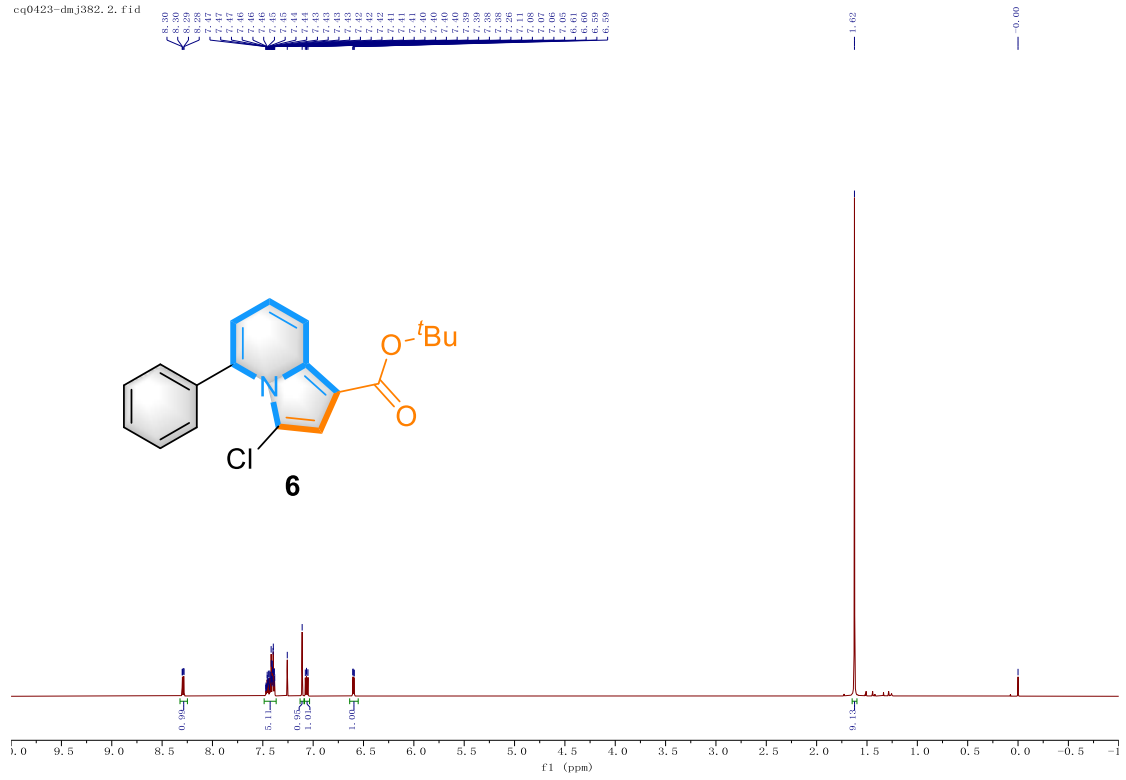

### 151 MHz $^{13}\text{C}$ NMR of **6** in $\text{CDCl}_3$

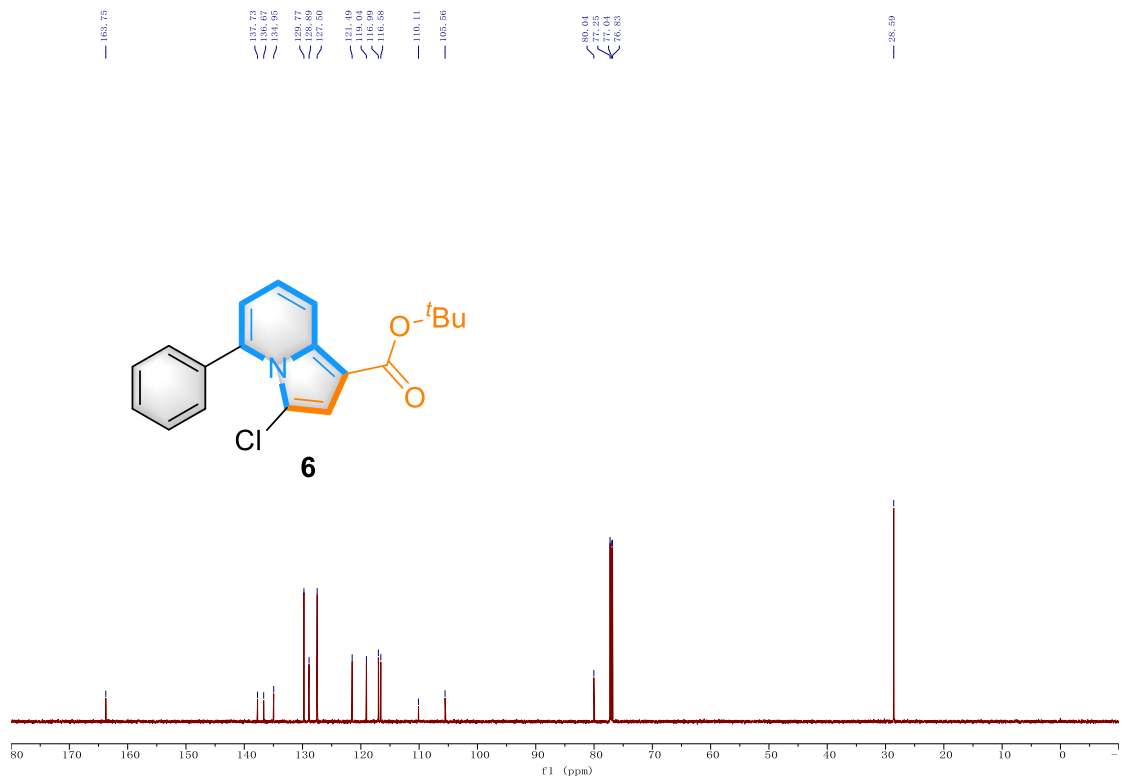



600 MHz  $^1\text{H}$  NMR of **8** in  $\text{CDCl}_3$

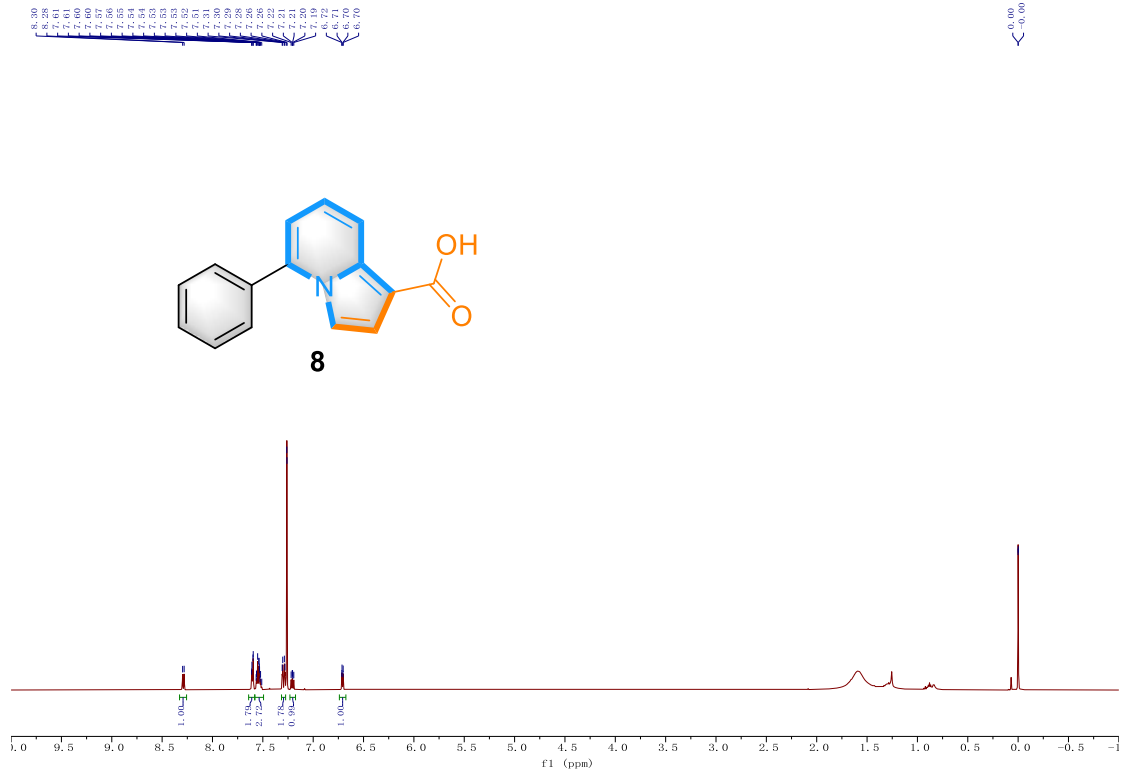

151 MHz  $^{13}\text{C}$  NMR of **8** in  $\text{CDCl}_3$

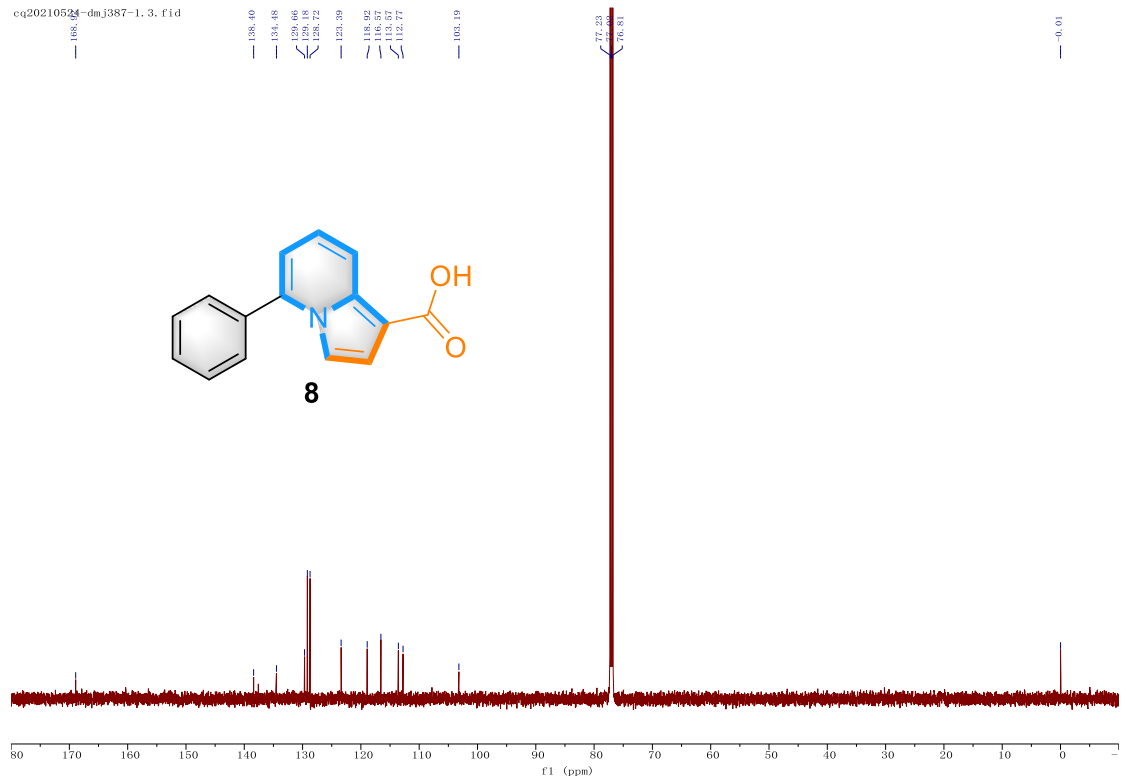

Supplement: d2qo00555g1.pdf [file d2qo00555g1.pdf]
